# Supplementary material
Source: Research Square preprint supplement (doi:10.21203/rs.3.rs-9593389/v1)
Supplement: Supplementary file 1 [file 0a4b4c2e1197c3f8c6352d2d.xlsx]

## Sheet: Sheet1
Supplementary Table S4. Primer sequences used for RT-qPCR.
Target	Species	Primers	Sequences (5′→3′)
RPE	Human	Forward	AAGCCAATGGCTGTAGCAGGAG
		Reverse	CTGAGGTTCCTGGTTTGATGGC
NAA50	Human	Forward	TCCAGTCAGCTACAATGACAAGT
		Reverse	CCTTCGGTAAGGTGCCAGAC
PGK1	Human	Forward	CCACTGTGGCTTCTGGCATA
		Reverse	ATGAGAGCTTTGGTTCCCCG
OGDH	Human	Forward	GGCTTCCCAGACTGTTAAGAC
		Reverse	GCAGAATAGCACCGAATCTGTTG
GRIK1	Human	Forward	GGATGTATGTGCTCTTAGCCTGC
		Reverse	GTTTTCCACCACGTCTGAGTCAG
FKBP5	Human	Forward	GCGAAGGAGAAGACCACGACAT
		Reverse	TAGGCTTCCCTGCCTCTCCAAA
AR	Human	Forward	ATGGTGAGCAGAGTGCCCTATC
		Reverse	ATGGTCCCTGGCAGTCTCCAAA
β-actin	Human	Forward	GTCATTCCAAATATGAGATGCGT
		Reverse	GCTATCACCTCCCCTGTGTG
GAPDH	Human	Forward	AGGCTGTGGGCAAGGTCATC
		Reverse	TCAGGTCCACCACTGACACG
