# Supplementary material
Source: Research Square preprint supplement (doi:10.21203/rs.3.rs-9593389/v1)
Supplement: Supplementary file 2 [file 396b5ae588f4cc8fc190cec5.xlsx]

## Sheet: Human_Metabolic_V2
Supplementary Table S1. Complete list of sgRNA sequences in the custom Human CRISPRko Library-Metabolism Plus.
sgRNA ID	sgRNA Sequence (5' to 3')	Target Gene
sg_00001	AGTTATGTTAGGTATACCCG	A1CF
sg_00002	ACAGGAAGAATTCAGTTATG	A1CF
sg_00003	CACTGGCACAAACCCCTAAG	A1CF
sg_00004	GAATTCAACAATATCAAACC	A1CF
sg_00005	TCATCCTCAAAAAGGTCTCG	A1CF
sg_00006	ACACGTAGTACATCACGCTC	A3GALT2
sg_00007	GCGCATGCGCACGTTGCACG	A3GALT2
sg_00008	AGATAGTCAGCCCAATGGTG	A3GALT2
sg_00009	GACGTGGACCAGCACTTCAG	A3GALT2
sg_00010	AAATAATGGGAGCCCCCCAG	A3GALT2
sg_00011	GCCGCGTACCAGTCGGCCAG	A4GALT
sg_00012	CTGGAGGCGTCGGAGAGCAC	A4GALT
sg_00013	CGGAACCTGACCAACGTGCT	A4GALT
sg_00014	ATGATCTACTGGCACGTTGT	A4GALT
sg_00015	GGATTCGGGGTGAGTTCTGG	A4GALT
sg_00016	GGCAGCAGACTCTACGGAAC	A4GNT
sg_00017	GAAACACAATGCCACGTCTG	A4GNT
sg_00018	GCCATCATCTGGAAATACGG	A4GNT
sg_00019	TGCATTCCCACAAAAAGGGG	A4GNT
sg_00020	TGAAAGAAGGCAAACAGAAG	A4GNT
sg_00021	GTTACCAGGACAGTGATGCT	AACS
sg_00022	GTGCATGGTGCATTCCGCTG	AACS
sg_00023	CACATTCACACCGAAGTCCG	AACS
sg_00024	GTAGACATACTCGTAGCTCT	AACS
sg_00025	AAGGTCTATGTTCTCTCTGG	AACS
sg_00026	GGGCAGGATAAATTAAAGAC	AADAC
sg_00027	TGAATTGGGAAATGATACTT	AADAC
sg_00028	AAGTCTGAAGCACTAAGAAG	AADAC
sg_00029	GGTATTTCTGGAGATAGTGC	AADAC
sg_00030	AGGAGCCATGGAGAATGATG	AADAC
sg_00031	TGACTTCCTGAATAGATGGA	AADACL2
sg_00032	CCCGCAATGCAGATTCGGGT	AADACL2
sg_00033	AAAGAAAGTCAGAAACCCGA	AADACL2
sg_00034	GTGATGTATTCATCTGAAAG	AADACL2
sg_00035	AATCTGTTATCTGTAAGCCA	AADACL2
sg_00036	TCGGGGTCATACTTTAGCGG	AADACL3
sg_00037	GGCATCGTGTACTACCACGG	AADACL3
sg_00038	ACTTATGCTTAGGTAACTTG	AADACL3
sg_00039	GTCACCGCAGACCACAACCC	AADACL3
sg_00040	AAACCCCTTCGTTTCAACAG	AADACL3
sg_00041	CAAGGTAGCAGGGATATCCG	AADACL4
sg_00042	TAGAAGATGATGCCTCGCCG	AADACL4
sg_00043	TTCTCCACAGACCACAACCC	AADACL4
sg_00044	AAGTACAGATTCAGTCTCCC	AADACL4
sg_00045	GTCACGCCAGGAGAGGTCAA	AADACL4
sg_00046	GTAGCTGACATATTGAGCAG	AADAT
sg_00047	TTGACTGGGTGGGTAATGGA	AADAT
sg_00048	ACATCCATGGAAAGAAATGT	AADAT
sg_00049	AATAAGCAGGTTCATCTAGG	AADAT
sg_00050	ATTGATACTTACCCAGCACT	AADAT
sg_00051	GCCCTCCTCGAACCAGCCCA	AANAT
sg_00052	GTTTCGCTGCCTCACCCCGG	AANAT
sg_00053	CCGAGTCCCCGAGCTGTCAG	AANAT
sg_00054	GCCTTTGAGATCGAGCGTGA	AANAT
sg_00055	GGTGCACGGCCAGCACATGC	AANAT
sg_00056	CAAGAGGGTAAGTCTATCCC	AASDH
sg_00057	GTAGCTCGCATTGTGCCAAG	AASDH
sg_00058	TGATGTCAAAAAGTACCCTA	AASDH
sg_00059	GAACTATGATACATTTACAG	AASDH
sg_00060	GTATCACAGAGGTATCAAGT	AASDH
sg_00061	AGTGCGATCGATTCAGCCCG	AASDHPPT
sg_00062	AAATCCTAGTCCAACACCAA	AASDHPPT
sg_00063	GCTGAACCTGAGCTGCAAGT	AASDHPPT
sg_00064	TCAGAAGCTTTAAGGATGAG	AASDHPPT
sg_00065	CCGGGACGCTAAGGCAGCCA	AASDHPPT
sg_00066	TCTTGATACAGCCTTCGAAT	AASS
sg_00067	GGGTAGTGGCATTTGGACAG	AASS
sg_00068	AAACGACTTATGTAGCGCTC	AASS
sg_00069	TGAGCTACCTTGTGAATATG	AASS
sg_00070	TAAATATATCCAGACACTCC	AASS
sg_00071	GGCCCATCGCACCGTTCCCA	ABAT
sg_00072	GAAAGAAGTCATCGGATGCG	ABAT
sg_00073	TGCAATTACGAAGAGAGCCG	ABAT
sg_00074	TTTGTCAACAGACCCGCCCT	ABAT
sg_00075	GCGTTCCATGGGAGGACCAT	ABAT
sg_00076	GTGGCATGGCAGGACTACGT	ABCA1
sg_00077	AACCCCAGAGTCCTTACCGA	ABCA1
sg_00078	CTGGAGTGACATGCGACAGG	ABCA1
sg_00079	CGTACCGCATGTCCTCAAAG	ABCA1
sg_00080	AATGATTCTGACATAGACCC	ABCA1
sg_00081	GACACTTCAGTGAATGCACG	ABCA10
sg_00082	ACTCTCTGAAATAACTGACA	ABCA10
sg_00083	GGGTACTGAAGAGGATAAGT	ABCA10
sg_00084	GCAAATGTATGTCAATCCCC	ABCA10
sg_00085	AAAATAATGGAGAATCCCCA	ABCA10
sg_00086	GGTCTTGAGACTCATCCGGA	ABCA12
sg_00087	ATTGCACGATACGAAGAACA	ABCA12
sg_00088	GTCAACGCACCACTTGGACG	ABCA12
sg_00089	GCAGAAGGGTGAGTCCGATG	ABCA12
sg_00090	GACATCATTAACATGCCCGC	ABCA12
sg_00091	AGTCTAGCAACATTATGGGT	ABCA13
sg_00092	CCAAACATGTACTTACACTG	ABCA13
sg_00093	AAAATCTTGGATCGCAGCGG	ABCA13
sg_00094	TGTCATGCGTACCCTTAAGA	ABCA13
sg_00095	ACCTTCAATAAATCAAACTA	ABCA13
sg_00096	GATGTCGTGCCCGTAGATGG	ABCA2
sg_00097	CATGTACGTGGCGATCCGAG	ABCA2
sg_00098	TAGGGGATGAAATTGCCACG	ABCA2
sg_00099	CTTGTGTGGCAACAACCGGT	ABCA2
sg_00100	GCCCAGGCCGCCAGTAGGCG	ABCA2
sg_00101	GAAGTTGGAGACCACAATGG	ABCA3
sg_00102	TGCCGGCTATCACATGACGC	ABCA3
sg_00103	AGAGTCATCCAGTTGTACCG	ABCA3
sg_00104	AAGGGGTCTGCGATGAACGG	ABCA3
sg_00105	CTGGCGCGAGTGGAAAATGG	ABCA3
sg_00106	ACGAATCGTCCACGAAGCAG	ABCA4
sg_00107	AGATTCTTCACGCATACCCC	ABCA4
sg_00108	AGGGTGTTGAGTTGCCACAG	ABCA4
sg_00109	TCTGGACGAACCCACCTCTG	ABCA4
sg_00110	GCAGAGCTTACTGTCTCCGG	ABCA4
sg_00111	GAAATAGATACCTTTCCCCG	ABCA5
sg_00112	TGACAGTGACTATGTATCCG	ABCA5
sg_00113	AAATTATGAGGAGTTATCAG	ABCA5
sg_00114	TCAAAGTGTATATCTAACTG	ABCA5
sg_00115	ATACAATATGTCGAGAACAG	ABCA5
sg_00116	AACCAATCACCCTGTGATGG	ABCA6
sg_00117	GGACAGTCAACTATCGAACA	ABCA6
sg_00118	ACTGATGGCCTCTCATACAA	ABCA6
sg_00119	TTGTATATGAGTCTCCTGAA	ABCA6
sg_00120	AAAATGCTAAGTCCCAGCTA	ABCA6
sg_00121	AGTACGGGATCCCTGAACCA	ABCA7
sg_00122	TGTACTGAGGACAGACGCCC	ABCA7
sg_00123	AGGACGCACACGCTGATGTG	ABCA7
sg_00124	GATGCCCTATCCGTGCTATG	ABCA7
sg_00125	CACCTGAGCACCGTACATGG	ABCA7
sg_00126	ACCAGCATAGAGCAAACCCC	ABCA8
sg_00127	GGAGCAAGGAAATACAAATG	ABCA8
sg_00128	GAAACCAGTGATTACCCGCC	ABCA8
sg_00129	CAAGCTTAAAATCCACTCCA	ABCA8
sg_00130	ACTGCAATACTTGGTCACAG	ABCA8
sg_00131	ATATCAGAAAAGTTACCCGT	ABCA9
sg_00132	GCCAGCATACATCAAACCCC	ABCA9
sg_00133	TGGCAGGAAGAACAATCATG	ABCA9
sg_00134	GGGACAATTACAAACTGATG	ABCA9
sg_00135	ACACGGAAGGGCTAATCATG	ABCA9
sg_00136	TTTATAGTAGGATTTACACG	ABCB1
sg_00137	TCTACGGGAAATCATTGGTG	ABCB1
sg_00138	TAGGTGATATCAATGATACA	ABCB1
sg_00139	TCAAACCAACTCACATCCTG	ABCB1
sg_00140	CAAACGATGAGCTATCACAA	ABCB1
sg_00141	GGCAGCACCACACAGAAACA	ABCB10
sg_00142	GAGTTCACCCACGGTCATGT	ABCB10
sg_00143	GGCTGGCGTACCCTGAGCGC	ABCB10
sg_00144	ACAGCAATGATTGACACTGG	ABCB10
sg_00145	GTGAACGGCGATAGGGACCC	ABCB10
sg_00146	TTTCAGAATCCTCCTAACTG	ABCB11
sg_00147	GCTGCTCCAATCCCAATGAG	ABCB11
sg_00148	GAGCTCCCCAGATTTAGCAA	ABCB11
sg_00149	TCAACATGGTCATTAAACCA	ABCB11
sg_00150	GGAACTGTTAGTCCATACAA	ABCB11
sg_00151	ACACCACTGAACTCAATACG	ABCB4
sg_00152	TGGCCGTGGAAATGTAACCA	ABCB4
sg_00153	AGGACTGTGATAGCTTTCGG	ABCB4
sg_00154	GAGAATATGACTGAAAATGC	ABCB4
sg_00155	ACAGCCACTACTTCCAACCA	ABCB4
sg_00156	CAAAGGTCGGACTACAATCG	ABCB5
sg_00157	ACTGCCATTGAGACCGACCA	ABCB5
sg_00158	GAAACCTTCGCAATAGCCCG	ABCB5
sg_00159	GGAATCCACCCAATCTAAAG	ABCB5
sg_00160	ATCACTGACCTGATATAACA	ABCB5
sg_00161	TCGTCGTGCTATGAACACAC	ABCB6
sg_00162	GGAACGGGCACTCAATGTGT	ABCB6
sg_00163	GCACGTAGGGAGAGATGCGA	ABCB6
sg_00164	CATGTACAGCTGGATAATGT	ABCB6
sg_00165	AGCGCAGTGAGAGCTCGTGC	ABCB6
sg_00166	TCACAGTTGCAGTCACACGG	ABCB7
sg_00167	TCCCTGCTAGGACAAAGTGA	ABCB7
sg_00168	TTAGATGGTGTATCAAGAGC	ABCB7
sg_00169	GATTAAATACCAAAGCACTC	ABCB7
sg_00170	AAGCAATGCTTTCTTATGTG	ABCB7
sg_00171	AAGTACACAAGGGACCACGT	ABCB8
sg_00172	TCTTTGACGCCAATAAGACA	ABCB8
sg_00173	AAGCGAGACCCCACGACATG	ABCB8
sg_00174	CTTGGAACAAGGCGATGCCG	ABCB8
sg_00175	CGTGAGGCGTGTCGACAGCA	ABCB8
sg_00176	CGAACAGGGCCCAAAACCAG	ABCB9
sg_00177	GCCTACATGTACTACGTCTG	ABCB9
sg_00178	TGGCCAAGAACAGTGCGCTG	ABCB9
sg_00179	CAGCCGACCATGGTGCACGA	ABCB9
sg_00180	TGGACACCATCATGATGATG	ABCB9
sg_00181	GTTGACAATCTCCCCGACCG	ABCC1
sg_00182	AGTACACGGAAAGCTTGACC	ABCC1
sg_00183	GGTACGCAGGAACTCAGCGA	ABCC1
sg_00184	AGCCCCGGACAATCAACCTG	ABCC1
sg_00185	GTTGGGCTGACCAGAAACAC	ABCC1
sg_00186	CGTGTACCAAGCTTACTGGA	ABCC10
sg_00187	GGCAGCCCACAGGTATACAC	ABCC10
sg_00188	CAAGATGAGACCACCCACGA	ABCC10
sg_00189	GCATGCTGAGCTACACCACA	ABCC10
sg_00190	GAGGTAGAAACGGATGTCTG	ABCC10
sg_00191	GCTGATTAAAATGTACACAT	ABCC11
sg_00192	ACGGTCGGAATAGACGGCGC	ABCC11
sg_00193	AATACACATCACCTCAGGAG	ABCC11
sg_00194	TAGGGGTCTGCGGCAACACG	ABCC11
sg_00195	TAAGCTTTGGATCATGAGCG	ABCC11
sg_00196	GAGTCATATGTCGACAATGG	ABCC12
sg_00197	CACGGCCATCCGGTTGAAGG	ABCC12
sg_00198	GGGCAACAGGACCATGTGTG	ABCC12
sg_00199	CAGCAGGTAGAGCTGACGGT	ABCC12
sg_00200	GGTTGGGTGATGTAAGATGG	ABCC12
sg_00201	GATTGGTATATCGAACAGCA	ABCC2
sg_00202	AGGGAAAGTTACCAGGACAA	ABCC2
sg_00203	TCAGGGTATAAATCTTAGTG	ABCC2
sg_00204	TTCGTCGAACACTTAGCCGC	ABCC2
sg_00205	TGAGAGCCGCAGTGAATAAG	ABCC2
sg_00206	GCAGGGCGTACAGTCTTCGG	ABCC3
sg_00207	GGATGACCCACTGTCCGCGG	ABCC3
sg_00208	TGTGTTCTGGGATTATGCCA	ABCC3
sg_00209	CCACGTACACGTACACCCAG	ABCC3
sg_00210	TGAACCACCAGAAAAACAGG	ABCC3
sg_00211	GCGTCACTGCCACGAACACG	ABCC4
sg_00212	CACAGCGTACGCCTATGCCA	ABCC4
sg_00213	GCTGACCAGCCCGTGACTTG	ABCC4
sg_00214	TGAGTCAATTCTGAAAGCTC	ABCC4
sg_00215	AAGGTACGATTCCTTAGTGT	ABCC4
sg_00216	CTGGACACGTTCATCCGTGG	ABCC5
sg_00217	GATCCACACAACCCTTCGCA	ABCC5
sg_00218	TACGGAAAGAGGCACCCATG	ABCC5
sg_00219	GAGGAGCCAACCTGAGCGGT	ABCC5
sg_00220	GCAGTGTCCTCTGTAAGCGC	ABCC5
sg_00221	CAGACCACGATCCAGACGAG	ABCC6
sg_00222	CAGGGCATGAATCTCTCCGG	ABCC6
sg_00223	GGACAGCATCCAATACGGCA	ABCC6
sg_00224	CAGACGGTCAAAGGACACCC	ABCC6
sg_00225	GTAGGAACCCATCTCTGCGA	ABCC6
sg_00226	CAGACCAACGAGATGCTCCG	ABCC8
sg_00227	TCAACGCCAGCGAATCAGTG	ABCC8
sg_00228	GTTGTGATAGTAGACCACGG	ABCC8
sg_00229	GCTGCAGGAAGCGTACCCCC	ABCC8
sg_00230	CTACCGTCAAAGCTCTAGTG	ABCC8
sg_00231	TCACGGCTGGCATAAAGAGG	ABCC9
sg_00232	GACTGCAAATCTGACCACCG	ABCC9
sg_00233	CCAGTAAATCAGCCAGATAG	ABCC9
sg_00234	GAGGATGGCAAGGAGAAGAG	ABCC9
sg_00235	GAGACTGGCATTAACCTCCG	ABCC9
sg_00236	TTGGCCCTCCAGGTAACGGA	ABCD1
sg_00237	GAGGAGATCGCCTTCTATGG	ABCD1
sg_00238	GTCTCCCGGCACAGGACCCG	ABCD1
sg_00239	AGTTCCTCATGAAGTATGTG	ABCD1
sg_00240	GGAGTAGAGGTGGGCCACAG	ABCD1
sg_00241	CCCTGACCAATCTCTTACGG	ABCD2
sg_00242	AGATTAGAGCCACTGAGTGC	ABCD2
sg_00243	CCTTATTGCACTGTTGACGA	ABCD2
sg_00244	CTGGAGCTGATGCTATTGAA	ABCD2
sg_00245	CAGCAGTGGACTAATTATGG	ABCD2
sg_00246	GCTCACTAAATACCTCTATG	ABCD3
sg_00247	GTGGTTTGCAGTGGTATCAT	ABCD3
sg_00248	TTTAAGGATTACTACCAAAG	ABCD3
sg_00249	TGGCAAATATGAGCGCACAA	ABCD3
sg_00250	ATAACTGAGCAAAAGTATGA	ABCD3
sg_00251	AGCCACATCTGAGAGCGTCG	ABCD4
sg_00252	GATCCCCAGTCAGTACTATG	ABCD4
sg_00253	AGGACGTGGAGCGATTCTGC	ABCD4
sg_00254	AGCACATGAGGACAGACCGC	ABCD4
sg_00255	CAGAGATGGAGACCCGCTCA	ABCD4
sg_00256	TTGACATCTAGGTAACTAGA	ABCE1
sg_00257	GACAATTGATAAGGCGCCAA	ABCE1
sg_00258	CCAAAACTTCACCTGGACGA	ABCE1
sg_00259	ATATGTAGACCAGATTCCTA	ABCE1
sg_00260	GTGACAACTCCATAGGCGCT	ABCE1
sg_00261	GTCCTACCAGCCCGTAGCGG	ABCF1
sg_00262	AGATGAGACACCAGCAGTCC	ABCF1
sg_00263	AAAAGGAGCCTCCCAAACAA	ABCF1
sg_00264	TAAGCCAGATGACAGCGTTG	ABCF1
sg_00265	TGTAATTGCCCCTATAGTAG	ABCF1
sg_00266	ATGATCAGTACGTGAAGACG	ABCF2
sg_00267	GGGTCGTGAGCGATAAGGTG	ABCF2
sg_00268	CAGTCCATGCAAGATCCGCG	ABCF2
sg_00269	TGGACCTAGATGCTTGCGTG	ABCF2
sg_00270	AACCAATGAGGCCATAACGA	ABCF2
sg_00271	CAGCGGCTAGATGGTTACCG	ABCF3
sg_00272	GCGGATGTGAACCTGGCATG	ABCF3
sg_00273	GTGTGCGAGAGGATTTGCTA	ABCF3
sg_00274	TCAAAGATAACGGAGAACTA	ABCF3
sg_00275	TCCAGAACCTACAAACATGC	ABCF3
sg_00276	GAGGCCGATCCCAATGTGCG	ABCG1
sg_00277	GTGGCAGCCTTCCATGGACG	ABCG1
sg_00278	CAAGGACAATGTGTGTACCG	ABCG1
sg_00279	TCATCGAAGAACATGACTGG	ABCG1
sg_00280	AGTACGGTGATCAGAACAGT	ABCG1
sg_00281	TAACTTAGGATGTCTAAGCA	ABCG2
sg_00282	GAATTACATCAACTTTCCGG	ABCG2
sg_00283	GGAAGGCTCTATGATCTCTG	ABCG2
sg_00284	AAAAAGGACTAGTATAGGAA	ABCG2
sg_00285	AGCTGATTCAAAGTATCCCA	ABCG2
sg_00286	GAGCACGCCAATAACCACGT	ABCG4
sg_00287	GCTTCCAACACCGTGAGGTG	ABCG4
sg_00288	CAGGTCTCCATACTCGCCAG	ABCG4
sg_00289	GAGCAGGGCTGTCCTCGTGT	ABCG4
sg_00290	TGGAGCTGTCCTATTCCGTG	ABCG4
sg_00291	CAAGATGTGATGTCCCACCA	ABCG5
sg_00292	GGACGTAGGAGAAGCAGTCC	ABCG5
sg_00293	ATGTGCATCCTAGGAAGCTC	ABCG5
sg_00294	GGCTCCTTCCAGAAGAAGGT	ABCG5
sg_00295	CAGGAGAGTGACAAGAAACT	ABCG5
sg_00296	GAGTCCTACGAAGATGCCTG	ABCG8
sg_00297	GTGGGCAACATGTACGTGCG	ABCG8
sg_00298	GGCCGCCCCTAAGTAGATGG	ABCG8
sg_00299	TGAGCCAGCTGCTCAAACCA	ABCG8
sg_00300	GGTACCTGAGCTCCCTATGA	ABCG8
sg_00301	GCTGTCGTGTTTAACAACCG	ABHD1
sg_00302	AGACTTTCTACCCAACGCTG	ABHD1
sg_00303	GGTGCAAGACGTATGTCTCC	ABHD1
sg_00304	GATTCAGCACCAGTATCCTG	ABHD1
sg_00305	GTGATTACAGAGGCCTCGGC	ABHD1
sg_00306	AGGTCACGCCTGCATAAGGT	ABHD10
sg_00307	TGCACGACCAGAGAAGGTCG	ABHD10
sg_00308	TATGAATGGTACAAAAGCGT	ABHD10
sg_00309	TGGGTACCTTGTCGGAGCTG	ABHD10
sg_00310	CTTAACAAAACAGTCACCTG	ABHD10
sg_00311	GCTGTGGCCAACGACGACGC	ABHD11
sg_00312	GAGCCCGTGCAAAAAGACGA	ABHD11
sg_00313	CCACGGCCCTAGCTTCGCGA	ABHD11
sg_00314	ACGGTGGATGCTCGTAACCA	ABHD11
sg_00315	TGCTGTAGATATCAGCCCAG	ABHD11
sg_00316	GAGTGGCCCCAGATGTACAC	ABHD12
sg_00317	GCAGGTACAGAATGATAGGG	ABHD12
sg_00318	TTTCTCATCAAACTATGTCC	ABHD12
sg_00319	CAGTGGGAACGCCATCTGAG	ABHD12
sg_00320	CCAGAGGAAGACGTGACCAT	ABHD12
sg_00321	TAAATTAGCATGTCTATCAG	ABHD12B
sg_00322	TTGTGTCTATGAGTGGACCA	ABHD12B
sg_00323	TCTACCTGAGAGTTGAACCT	ABHD12B
sg_00324	TAATTGGGTTCCCATCACGA	ABHD12B
sg_00325	GCGGTACTCACCGCAGGTTG	ABHD12B
sg_00326	ATGCAGGCAACATAGGTCAC	ABHD13
sg_00327	TGTGGAATGCCAGTGGGCAT	ABHD13
sg_00328	GAAAATAAAGCAATACATCC	ABHD13
sg_00329	TAGGATTTCAGCCATTATGG	ABHD13
sg_00330	AATAGCCACTGCTCCACCCA	ABHD13
sg_00331	GCATAGTGGCCACTCAGCGA	ABHD14A
sg_00332	GTGCCGAGTTCCCAAAACCT	ABHD14A
sg_00333	ACCGGGCCCAACGGGATGAG	ABHD14A
sg_00334	GGAGCATGAGCAGCAGACTC	ABHD14A
sg_00335	TCCCACTCAACCAGGCACAC	ABHD14A
sg_00336	TGATGGACTGATCACAACCG	ABHD14B
sg_00337	AGAACCTGGGTACACTGCAC	ABHD14B
sg_00338	TGCAGGTCTGGGGCACTCCA	ABHD14B
sg_00339	GGGCCACTGGCACAAAGCCC	ABHD14B
sg_00340	GAGAGGCCCTGCCCGGCAGT	ABHD14B
sg_00341	GGGCGTAGTCAACGAAAGTG	ABHD2
sg_00342	TGCACACAATGTTACCACCC	ABHD2
sg_00343	ACCTCAGTGCACTGTACCCC	ABHD2
sg_00344	GCTCAGCCAAGGGCTCGAAG	ABHD2
sg_00345	AGGTGACCTACCTGTGCGAG	ABHD2
sg_00346	TAGTACGTTTCTGTAACCAC	ABHD3
sg_00347	ACTCCTTGCTTGTTCCCGTG	ABHD3
sg_00348	TACTTCCTGTACTGCACCGG	ABHD3
sg_00349	GTCACTACTTCCAGACGCCA	ABHD3
sg_00350	GTGGGCTTATCCCTTATCCT	ABHD3
sg_00351	TACTACAGGCTACTCACCCC	ABHD4
sg_00352	GACATCGATAGAGACATGGC	ABHD4
sg_00353	GGGGTGCACGGATCTCACTG	ABHD4
sg_00354	TCAGCTGAGACATGGAAGTG	ABHD4
sg_00355	AAACCAGAATAAGATCTGGA	ABHD4
sg_00356	TAAGGTGTGATATAGACGTA	ABHD5
sg_00357	TTGGACGAAGTAGTAGACCC	ABHD5
sg_00358	GTGGAGATGTGCCCTAGGAT	ABHD5
sg_00359	ACTCGCTGAAGTACCCATCA	ABHD5
sg_00360	AGAACATAAGCACTCACCAA	ABHD5
sg_00361	TGTCCACGCAGACCAAGTGC	ABHD6
sg_00362	CAGCAGGACACACGAGACAC	ABHD6
sg_00363	GCAAGTTAAGAGGATACACC	ABHD6
sg_00364	TCTGGGGTAGACGGGATCAA	ABHD6
sg_00365	CAGAGAATCCGTGGAGCATG	ABHD6
sg_00366	TCACCGTGTACCGCAATGGG	ABHD8
sg_00367	GCCGGGCTTGACCTCTACAA	ABHD8
sg_00368	GATGAAAAAGAGCACCACGT	ABHD8
sg_00369	GTGATCATGATCAATGGCGG	ABHD8
sg_00370	GCCAGGGTTCACTTACCCGT	ABHD8
sg_00371	CCGGTCCCCAGCGTCACGCG	ABO
sg_00372	AAACACAGTTAACCCAATGG	ABO
sg_00373	TGCCAGGAAGCCTGGAACGG	ABO
sg_00374	CAGTAGGAAGGATGTCCTCG	ABO
sg_00375	ATGGAGTTCCGCGACCACGT	ABO
sg_00376	TCAATAGACAGTGTTCGTCG	ACAA1
sg_00377	TGCCGAGAGAAGCTCGTCGG	ACAA1
sg_00378	AGCGCGAAGTAATATTTCCA	ACAA1
sg_00379	GCCCTTGTCATCATGGACCG	ACAA1
sg_00380	TGAGCGGTTTGGCATTTCAC	ACAA1
sg_00381	TGCTCGGCCCCAAACCACCC	ACAA2
sg_00382	TACCTGACATCCATTCACAA	ACAA2
sg_00383	CTTGGATCAGATATCAAGGT	ACAA2
sg_00384	ACTGCAGGGAATGCATCGGT	ACAA2
sg_00385	TGAGACTTTGCCAGCAGACA	ACAA2
sg_00386	TGATGGGTCCATGATAACCG	ACACA
sg_00387	AATGCATGCGGTCTATCCGT	ACACA
sg_00388	AGGTACCGAAGTGGCATCCG	ACACA
sg_00389	CCGGATCCCATGGTCAACCA	ACACA
sg_00390	GATGTACATCGGCTGAGTGA	ACACA
sg_00391	TAGCGTCTGGGCGACAACGG	ACACB
sg_00392	ACAACGACATCGACACCGGG	ACACB
sg_00393	CCTGCACAGAGACTTTACCG	ACACB
sg_00394	AGTAGGCAGGACGTCGAAGA	ACACB
sg_00395	GTCATCCTCGGAGTATAGGG	ACACB
sg_00396	AGCTCGATACTGCTTAACCC	ACAD10
sg_00397	GTACTCCATCACATAGAAGG	ACAD10
sg_00398	ATCGCTTGTAGACTCCCTGT	ACAD10
sg_00399	AGAGAGAAAAATGAGTCCAC	ACAD10
sg_00400	AACAAGGTCCTACCACACGT	ACAD10
sg_00401	ATATGGCTGAACGTTCTGCT	ACAD11
sg_00402	AAATGAGCTAAGTCTGACAA	ACAD11
sg_00403	TAAGATGGCTGGAATAGCAC	ACAD11
sg_00404	TGTACAGACTCGGAAAGGTC	ACAD11
sg_00405	CCACTCCGATAGCTGTTGCA	ACAD11
sg_00406	AGCCCAGCTAGGCTTCGGAG	ACAD8
sg_00407	TCGAAGATCACAGCTCGTGT	ACAD8
sg_00408	GTGGTCATGTGCCGAACAGG	ACAD8
sg_00409	GTGGATGCTTATATAGGCTG	ACAD8
sg_00410	TCAGTCCTCTCACGGCAATG	ACAD8
sg_00411	CTTTCCCGACTGCTCCATCG	ACAD9
sg_00412	CTGCTGAGTACGCCTGCACA	ACAD9
sg_00413	CAGGTCTGGATTACTAATGG	ACAD9
sg_00414	TGGCGAAAGCTCGTACAGGC	ACAD9
sg_00415	CTTGCCTAAACTGGCGTCCG	ACAD9
sg_00416	TAAAATGGGATTAAAAGCCC	ACADL
sg_00417	ATGTCCTATATTACAAACCA	ACADL
sg_00418	GGCTGGCACTCACCGCGCGG	ACADL
sg_00419	AAGGCTAATACCATGGGCAG	ACADL
sg_00420	CTCCTCCCAGACAATAGCTG	ACADL
sg_00421	AAGATGTGGATAACCAACGG	ACADM
sg_00422	ATTGTGGAAGCAGATACCCC	ACADM
sg_00423	AATTGGCTTATGGATGTACA	ACADM
sg_00424	ACACACATTCCAGAGAACTG	ACADM
sg_00425	GTATTTGGGGAGAATGACTG	ACADM
sg_00426	ACACACCATCTACCAGTCTG	ACADS
sg_00427	GGCAGGTACCTGGTTCGCTG	ACADS
sg_00428	GTTGACACTCATGATGACTC	ACADS
sg_00429	AGAGCCCTGCAAAACAAGGT	ACADS
sg_00430	GCGGTCCCCACAGCAAACCC	ACADS
sg_00431	AGTATCACGATCTACTAAGA	ACADSB
sg_00432	AAGACCAGAGCTGATAAAGA	ACADSB
sg_00433	AGTGAGCTGAGGCAAATAGG	ACADSB
sg_00434	TCATCTGTAAATGTTTGCAG	ACADSB
sg_00435	GAAGTTGACCCAGAATATGG	ACADSB
sg_00436	GTATGGGAACACCTGATCTG	ACADVL
sg_00437	TATGCTGCAGTATGTAACTG	ACADVL
sg_00438	GTGGAGGAGACCACTTGGCA	ACADVL
sg_00439	GTGCCATCGGAGAACGTGCT	ACADVL
sg_00440	CACCAGATGCCAGCTTGGGG	ACADVL
sg_00441	GAGGATCAACACCATATGGT	ACAT1
sg_00442	GAAGTGAAAGAAGCATACAT	ACAT1
sg_00443	ATTACAGGAAATAAGATATG	ACAT1
sg_00444	TGTTTCTGCGCAGGATGTGA	ACAT1
sg_00445	GCTGCCTAAAAAAGATCCAA	ACAT1
sg_00446	TCTATGTTGCTCCCATGGCG	ACAT2
sg_00447	GCAGTCCAGTCAATAGGGAT	ACAT2
sg_00448	GTTCTCAAGTAAGCCAAGTG	ACAT2
sg_00449	CCTGTTAGACAAGCCAGTGT	ACAT2
sg_00450	TCTAACCTGAAGCATTGGCT	ACAT2
sg_00451	GTAGTTCCCTGGATACTGTT	ACBD3
sg_00452	ACATCAAAGAATCCAACCTC	ACBD3
sg_00453	GGGCCGCGACCGGATCCAGG	ACBD3
sg_00454	TGCGTCCCACAAAATAGAGA	ACBD3
sg_00455	AGAAGAAGAAAGGCTTCGGT	ACBD3
sg_00456	ACCACTTATATCGTCCAATG	ACBD4
sg_00457	GAACCTGCCCAAGAACGGTG	ACBD4
sg_00458	GTGATCGACACAGTGCCCCT	ACBD4
sg_00459	CCACAGAGTCCCATTCACCC	ACBD4
sg_00460	ATTCTACAGTTACTACAAGC	ACBD4
sg_00461	AGGAGTTCTGATATAACCTC	ACBD5
sg_00462	TGGTCATTCCAGTCAACCCA	ACBD5
sg_00463	ACTGGGTGATATGACCAAAG	ACBD5
sg_00464	CTCAAACCTAGTCTCGTGCA	ACBD5
sg_00465	TGACAGTGGAGCCGAGTCTG	ACBD5
sg_00466	GTAGTTAAAAAACTAGATCC	ACBD6
sg_00467	AGCCATCAAATCGAAAAATG	ACBD6
sg_00468	GCCATCACCGGCGACAGCGG	ACBD6
sg_00469	CCTCGATCTCAGGGCTATGG	ACBD6
sg_00470	CCTGCAAGGCCTGATTCAGG	ACBD6
sg_00471	CTGAAAGCAAGACCAGATGA	ACBD7
sg_00472	TCTAGCATTCCTGGACACGC	ACBD7
sg_00473	ACAGGGCTGCAGAAGATGTG	ACBD7
sg_00474	GGAGAACTGAAAGAACTCTA	ACBD7
sg_00475	GGGTACCTGCAGGGCCATGG	ACBD7
sg_00476	GGTGTGGAACGAGTATGCCG	ACE
sg_00477	GTTGTAGAAGTCCCAAGCCG	ACE
sg_00478	GGGCGCTAATACCTGATGTA	ACE
sg_00479	TATGGAAACCACCTACAGCG	ACE
sg_00480	CGTATCGGCGATGCAGTGCG	ACE
sg_00481	CCAAAGGCGAGAGATAGTTG	ACE2
sg_00482	AACATCTTCATGCCTATGTG	ACE2
sg_00483	ACAGTTTAGACTACAATGAG	ACE2
sg_00484	GACTATGGGGATTATTGGAG	ACE2
sg_00485	CAGGATCCTTATGTGCACAA	ACE2
sg_00486	AGGGCGTAGGCGTTGACCGT	ACER1
sg_00487	GGTGGCCGAGTTCTACAACA	ACER1
sg_00488	TGGACGAGATCGCCATCCTG	ACER1
sg_00489	GAGCGTCATGTGGAAATACA	ACER1
sg_00490	CCCAGACAACGTAAATGTAG	ACER1
sg_00491	TATCGCCGAGTTCTACAACA	ACER2
sg_00492	GCTGCAGGCTGGTAGCTCGG	ACER2
sg_00493	TGCAGTGCAAGGAACTCCCA	ACER2
sg_00494	ATTCAGGGGTAGGTTCAAGG	ACER2
sg_00495	GCATCTGACCCAAGAAACTA	ACER2
sg_00496	TGAACTGCACCGAACATTGG	ACER3
sg_00497	AGGAGAACTACTCCGTGACC	ACER3
sg_00498	TAACCCAGTCCTCTAAGCCA	ACER3
sg_00499	TATTAAACTGAATAGAACTA	ACER3
sg_00500	GACTCTGAAATATGAAATGC	ACER3
sg_00501	TATGTGGACACCCTATACCC	ACHE
sg_00502	GGTGTCCATGAACTACCGGG	ACHE
sg_00503	TCCATCTACCACAGGCACGA	ACHE
sg_00504	CACCCCCATAGATCCAGACG	ACHE
sg_00505	CATTCGCCTGAAGACCCCCG	ACHE
sg_00506	CGGTCACCTGTACACGACAG	ACLY
sg_00507	AAGGGGATTGATCTCGAGGT	ACLY
sg_00508	ACCTACCGATGTGCTCCCGC	ACLY
sg_00509	AGAGCAATTCGAGATTACCA	ACLY
sg_00510	GACCAGCTGATCAAACGTCG	ACLY
sg_00511	GCACCGTTGTGAGCTACCCC	ACMSD
sg_00512	GCTAAACATGACAGGAACTG	ACMSD
sg_00513	AGTGGTGCGAGAGAATTGCT	ACMSD
sg_00514	GCAGCTCCAACACCACAGCA	ACMSD
sg_00515	TCAGGTCCCACTCGTTGACG	ACMSD
sg_00516	TAAGACCGTTGGTTCTGACG	ACN9
sg_00517	TTTAGGAGACATAAGACCGT	ACN9
sg_00518	TTTCACGTACTGGTCGCCCA	ACN9
sg_00519	GCTGCACCGTGTTCTGCCCC	ACN9
sg_00520	GCGTTTCTTGCAAGAATGGG	ACN9
sg_00521	CTTGGTGTCTAGGTTTGACG	ACO1
sg_00522	GATGCTGTGAAAAAGTTAGG	ACO1
sg_00523	AGCCTGTAGCCAATCACCTG	ACO1
sg_00524	TCGAGTTCACCCCAACACCC	ACO1
sg_00525	TGGCTCAGGAATCATCCACC	ACO1
sg_00526	GGCATCCTCACGGTGAAAGG	ACO2
sg_00527	GCAGGTGCCAAATATGGCGT	ACO2
sg_00528	ATAGCCGTCCCGCTCAATGG	ACO2
sg_00529	ATTGTCTCCTCACCTCACTG	ACO2
sg_00530	AGCGAGGCAAGTCGTACCTG	ACO2
sg_00531	AGCCCGAGAAACCCTTGGTG	ACOT1
sg_00532	AGTAGCGCTCGTGCCGCACC	ACOT1
sg_00533	CTCCAGGTCCAGCTCGCCAA	ACOT1
sg_00534	GGAGTATCGGGCTAGTCTGC	ACOT1
sg_00535	CTACTTGCTCAGTCATCCTG	ACOT1
sg_00536	CCCTGCCACACCAACCAACG	ACOT11
sg_00537	CGTGTCCTGTAAGCAGACAG	ACOT11
sg_00538	GCCAACTGCGCCATTCAGGG	ACOT11
sg_00539	AATGCCTTCAAACATAGGTG	ACOT11
sg_00540	AATGGCCTTCAGCGTAGGGT	ACOT11
sg_00541	GAAAGGGATGAGCCCAACAC	ACOT12
sg_00542	TAGAGCATTCAGCACAAGCA	ACOT12
sg_00543	ATCCACTGAGGCTGTAACGC	ACOT12
sg_00544	GATGATTTCAGACGCTATCG	ACOT12
sg_00545	AGGAATGGGCCGAGGGCCGA	ACOT12
sg_00546	ACGTGGCTGTCAAACCGCCG	ACOT13
sg_00547	GCAATAGGCACTCTCCACGG	ACOT13
sg_00548	GGTGATAAAGGCCATGACCA	ACOT13
sg_00549	AGTAGATAACATATCAACAA	ACOT13
sg_00550	TGCACGGAAAGGGGAGCACC	ACOT13
sg_00551	CTGAAAGAAGAACTAACCTC	ACOT2
sg_00552	GCTCGCCAAGAGTGTCGGCG	ACOT2
sg_00553	AGCCCGAGAAACCTTTGGTG	ACOT2
sg_00554	TGACCAACCTGCCTCAGCTG	ACOT2
sg_00555	CGGCGCGAGCCGGTGCGCGT	ACOT2
sg_00556	ATAATAAGCTAGAGCCAACG	ACOT4
sg_00557	CAGCGTAACCCGCTGCTCCG	ACOT4
sg_00558	TAGGACCTGGACCCTTCCCA	ACOT4
sg_00559	TCGCGGGACTCGAGCCCATG	ACOT4
sg_00560	AAGGACATGAGGAGAACCTG	ACOT4
sg_00561	CCGCTGCGCATCGCAGTGCG	ACOT6
sg_00562	GGCTGGTGAAGCGCGACGTG	ACOT6
sg_00563	ACAGGCATTGATAAGTACAG	ACOT6
sg_00564	CAAAACCATGTCCGGCCAGG	ACOT6
sg_00565	TGGGCAGACTACTCATCCGG	ACOT6
sg_00566	GCGGCCAGATGATGCCAACG	ACOT7
sg_00567	GCGACAGGGGCACATACCAC	ACOT7
sg_00568	GTCCAGCCAGTCCTCAACCC	ACOT7
sg_00569	TGAGGTGGCGCATGTCAGCG	ACOT7
sg_00570	GCGCTCGACACGAGCCAGGG	ACOT7
sg_00571	GCTGTTTGGTGGTCAGATCG	ACOT8
sg_00572	TCGTGACCAAGACGCTACGG	ACOT8
sg_00573	GCTGCCAGTACTGTACCAAG	ACOT8
sg_00574	GGGACCCTAACCTCCAAAAG	ACOT8
sg_00575	CTGTGAAGGCCGTGCAACAT	ACOT8
sg_00576	TTTATCGATAGTTACAGCCC	ACOT9
sg_00577	TCATCTATACATGTGAATCA	ACOT9
sg_00578	TCTTCCCGACCCAGCTAACA	ACOT9
sg_00579	GAGAAACATCTCATGTATGG	ACOT9
sg_00580	GAGGATCTTGACAGCTTGGG	ACOT9
sg_00581	ACCTATCACCGGATTAACGA	ACOX1
sg_00582	GCGCCGCCGAGAGATCGGTG	ACOX1
sg_00583	CTTGCTTCACCAGGCAACTG	ACOX1
sg_00584	GCATGTCGGATGGCTTGTGG	ACOX1
sg_00585	CAAGCTGACTTACGGGACCA	ACOX1
sg_00586	TGCTGTACCGAGTTTGACGT	ACOX2
sg_00587	GTGTATCACAAACTCCTGGG	ACOX2
sg_00588	GACCATCTTCTAACCAACCC	ACOX2
sg_00589	GCATAACTGATGGCCAGCTG	ACOX2
sg_00590	TGGTCCTGAAGACTCCGGAT	ACOX2
sg_00591	GATCCCAACTGCACATACGA	ACOX3
sg_00592	AAGCCACGGCAGTAATACCA	ACOX3
sg_00593	AGCAAACACCACCGCGTGAG	ACOX3
sg_00594	AGTGCTTGAGTATCCAATGC	ACOX3
sg_00595	GAGAAGAGTCATACATGCCC	ACOX3
sg_00596	TGACAAGGTTCGGATACCCA	ACOXL
sg_00597	ACAGGAACGATGAAACAGTG	ACOXL
sg_00598	GGTCAACAGTCGCTCGCTGC	ACOXL
sg_00599	TGTTGATTCCCTCTAGCCGG	ACOXL
sg_00600	GCCCTGAACATGTTACTAAG	ACOXL
sg_00601	GGAACCCCCCTGACTACCGA	ACP1
sg_00602	ACATAGTATATAATCAAATG	ACP1
sg_00603	GGGGTTCCCTATCTCATACC	ACP1
sg_00604	ACCCAGACACACAAACAGCA	ACP1
sg_00605	ACGGTACCTGCCGGGCAACG	ACP1
sg_00606	GCCGTGATAGCGCTGCCGCA	ACP2
sg_00607	GCGATACACAGCAAACGCAC	ACP2
sg_00608	GCTTCAACCCGAACATCTCG	ACP2
sg_00609	AGGTGGTCGCCATTAGGGTC	ACP2
sg_00610	ACATGGTGGCCAACGAGACA	ACP2
sg_00611	ACCCACGGCTACAAAGCGCA	ACP5
sg_00612	TGCTCGGCTATGGACCACAC	ACP5
sg_00613	ACTCTAAGATCTCCAAGCGC	ACP5
sg_00614	CGTACCAGGGCACTTTGCGA	ACP5
sg_00615	GTCCTGGCTCAAGAAACAGC	ACP5
sg_00616	TGTGCATCGGATGTTCTACG	ACSBG1
sg_00617	GGAGCCCACATCACACATGG	ACSBG1
sg_00618	TCAAAAGAACTTCTATGGAG	ACSBG1
sg_00619	TGTAGACTAGCACACAGCAC	ACSBG1
sg_00620	TCTGGGCGGCAATATGGCTG	ACSBG1
sg_00621	ACACGAGAGTCTTAGCCATG	ACSBG2
sg_00622	TCCATGAAATCATCCCACTG	ACSBG2
sg_00623	GGGACCACAGGCATACCCAA	ACSBG2
sg_00624	ATTCTGGTTGGATATCGTGT	ACSBG2
sg_00625	AGGCTATCCAAACACGGACC	ACSBG2
sg_00626	GGGACCTAACTCCTATGCAT	ACSF2
sg_00627	GACATCTCGACCATGTGTGG	ACSF2
sg_00628	AGGATCATCCGCAACTGCTC	ACSF2
sg_00629	TCAACCTGACGTCTTCATGG	ACSF2
sg_00630	CAGGACGTTGTAGTATTGCT	ACSF2
sg_00631	TAACGATGCCTCCTACGTCG	ACSF3
sg_00632	GCAGCGCGTTGACCACACCA	ACSF3
sg_00633	GCCATAAAGACATTGATCCG	ACSF3
sg_00634	GCACGGCCGCCACACGTACA	ACSF3
sg_00635	TGGCATGACCGAGATCGGCA	ACSF3
sg_00636	CAAGAGCCATCGCTTCAGCG	ACSL1
sg_00637	GGGTCTCGTGGCGTACCAGA	ACSL1
sg_00638	GATGCCAATGAACTGATCTG	ACSL1
sg_00639	GTTTCCGAGAGCCTAAACAA	ACSL1
sg_00640	ATCACGTACATAGTCAACAA	ACSL1
sg_00641	GTGGTGAAGAGTAACCAATG	ACSL3
sg_00642	TATCTAAAGTATCACATCCA	ACSL3
sg_00643	GGAAAGTTCGAAGCTTGCTA	ACSL3
sg_00644	CGAGTGGATGATAGCTGCAC	ACSL3
sg_00645	GGATCCACAGGACTTCCAAA	ACSL3
sg_00646	ACCACTAGTATACATAACAA	ACSL4
sg_00647	ATTCTGTCAGTCCATAACCC	ACSL4
sg_00648	GAATTATCTTACCCCAGTCC	ACSL4
sg_00649	CGGAACAGCAGCCATAAGTG	ACSL4
sg_00650	TCCCAAACTTGGATACAGCA	ACSL4
sg_00651	GTTAAGGAGTCGAGGCACCG	ACSL5
sg_00652	GGCTTGTTACACGTACTCTA	ACSL5
sg_00653	TCTGATAGAGCAGAGTACCT	ACSL5
sg_00654	TGATTGTTCAGGTCAAGAAG	ACSL5
sg_00655	TATGTTTGAGAGGATTGTAC	ACSL5
sg_00656	TCTGTCGTCTATTGCCACGG	ACSL6
sg_00657	GGCACCCATACTCACGAGGG	ACSL6
sg_00658	GCTGAACCGGATGTACGACA	ACSL6
sg_00659	AGCTCCACAATGATCCACTG	ACSL6
sg_00660	GATGCTCACCCATGGGAACG	ACSL6
sg_00661	GGAGCACTGCTATACTGGCG	ACSM1
sg_00662	TATGGGCAGTCGGAAACGGT	ACSM1
sg_00663	TGTGGCTACCATTTGGACCC	ACSM1
sg_00664	CAAGGTCTTTGACTTAACAC	ACSM1
sg_00665	GAATGACTATGAAGTACCGG	ACSM1
sg_00666	TGACGCAGTTCTGTAGATGG	ACSM2A
sg_00667	ACAGGCTCCCGAGAGGACGT	ACSM2A
sg_00668	GTGCATGCTCCTAATGCCCA	ACSM2A
sg_00669	TGTCTGAGAAAAGCTGTGAT	ACSM2A
sg_00670	CTGGACATCCGAGAATCCTA	ACSM2A
sg_00671	CGAGGCAGTTCTGTAGATGG	ACSM2B
sg_00672	ACAGGCTCCCGAGAGGATGT	ACSM2B
sg_00673	TGTCTGAGAAAAGCTGCGAT	ACSM2B
sg_00674	ATGTGGACCATATCAGACAC	ACSM2B
sg_00675	GTATAGGTTGCAGATGTCTA	ACSM2B
sg_00676	AGAGTGGTGGCTTGCAAATG	ACSM3
sg_00677	TGAAACAGGACTTCAAACTG	ACSM3
sg_00678	TGCAACAGCGTCTACTGCTG	ACSM3
sg_00679	GAAATGGAGAAGAGATGCGA	ACSM3
sg_00680	ATAGAAGTCGGCTCAAAACG	ACSM3
sg_00681	AGAGGGTGAACCCAATGCCG	ACSM4
sg_00682	TACAATGGACTCCACCGCTG	ACSM4
sg_00683	GGAGGACATGACTTACGTCT	ACSM4
sg_00684	ACAGGGCTTGGTGAGCACGT	ACSM4
sg_00685	CATGTGTCCCTGGTCAGACA	ACSM4
sg_00686	ATAACTTTGGCATCAACTCG	ACSM5
sg_00687	GTGGAAACACCAGACTGGTG	ACSM5
sg_00688	GAATGATGCTGGTACTCCCA	ACSM5
sg_00689	TGGGCGAAGTTGAAGTACTC	ACSM5
sg_00690	GAAGATGTCAGATTCGGTCA	ACSM5
sg_00691	TGCCTCACCCAAGCGCACAC	ACSM6
sg_00692	CACGGCAGAGTTTACAACTG	ACSM6
sg_00693	GATGACTCAACTCTCCAAGA	ACSM6
sg_00694	AGACTCCACAAGACATCTGT	ACSM6
sg_00695	CCTGCCTAGGACGGACTCAG	ACSM6
sg_00696	ACCAGCATTGGGATAAACTG	ACSS1
sg_00697	GTGGTTATCACCTTCAACCA	ACSS1
sg_00698	GATCAAAGCAACGCTCTCGG	ACSS1
sg_00699	GGCGCGGGACACTCTCGTGT	ACSS1
sg_00700	GGGAGCACCGGAATGCCCAA	ACSS1
sg_00701	GGAGTGCAAAGCCCCAATGC	ACSS2
sg_00702	GGTGCACGGCAGACATTGGT	ACSS2
sg_00703	GTGGCATGAGCTCATGCAAG	ACSS2
sg_00704	AGGATGCCCGGCTATGCCTG	ACSS2
sg_00705	GCATTGTGGTCAAGCACCTG	ACSS2
sg_00706	ACATGGTATACATCGCCTGT	ACSS3
sg_00707	GATACGCTGTCATGCTACAC	ACSS3
sg_00708	CAAGCCCTGGACCAAAACGC	ACSS3
sg_00709	GAGTACCTGTCTTAGACCAT	ACSS3
sg_00710	TGATGCTGTAACAACCACCT	ACSS3
sg_00711	TGTAGGAGCACTGTCGACCC	ACVR1C
sg_00712	TGGTTCAAAGGACAATTGCA	ACVR1C
sg_00713	AGACATACACACTTCAGTCC	ACVR1C
sg_00714	GCATCAGTCATGCTAACCAA	ACVR1C
sg_00715	CCAAGATCTTTCATCTCTGG	ACVR1C
sg_00716	TAGCTTAGTCAGGTTCACGG	ACY1
sg_00717	CCATGCCTCACGCTTCATGG	ACY1
sg_00718	GCTGGACAGTGCGGATACGC	ACY1
sg_00719	GCCACTCCTACCAGGCACAA	ACY1
sg_00720	GACAGGCACCACATCCGTGT	ACY1
sg_00721	TGAGGTCATGGTCCACGTAG	ACY3
sg_00722	CACCTCATATGGGTCGTCCG	ACY3
sg_00723	ACGCATGGCAACGAGATGTC	ACY3
sg_00724	TTCGATGAAGTCCAGAACTG	ACY3
sg_00725	GGAGGACTTCGCGATTAAGC	ACY3
sg_00726	TGGGTCCAGAACACTGACCG	ACYP1
sg_00727	ATTGCAAGGTCCCATCTCCA	ACYP1
sg_00728	TAGGCTGAGGGTAAAAAGCT	ACYP1
sg_00729	ACAGTGCAAGGACAATTGCA	ACYP1
sg_00730	AGGAAACACCCTGATATCAG	ACYP1
sg_00731	GGACGCGCGAGACAATGAGG	ACYP2
sg_00732	TGAAGCTAGGAAAATAGGAG	ACYP2
sg_00733	TCATTGTCTCGCGCGTCCGT	ACYP2
sg_00734	TGTGAGTGAAGAACCATGGA	ACYP2
sg_00735	AAGGTCTCGCTGTTCTACCT	ACYP2
sg_00736	TCACCGTACTGTCCACGCCG	ADA
sg_00737	TGGACATACTCAAGACAGAG	ADA
sg_00738	CACAGACTGGTCCCCCAAGG	ADA
sg_00739	CCTGCTGGCCAACTCCAAAG	ADA
sg_00740	TTACCTGCCATAGTATAAGA	ADA
sg_00741	GCCTTGCACCTCCATGACAT	ADA2
sg_00742	AAGACATAGTCTCTGAACAC	ADA2
sg_00743	CCGAATCAAGTTCCCCACGG	ADA2
sg_00744	TCACTGACCACTCTTCGTCA	ADA2
sg_00745	GGTTTGTGTAAATCACCTCC	ADA2
sg_00746	TTACAACTGTGACTTAATCT	ADAD1
sg_00747	AGGTGAATACAATTACAGCC	ADAD1
sg_00748	AACTGGTGCAAGGCTGACAC	ADAD1
sg_00749	AAGACGATAACTACACCCAC	ADAD1
sg_00750	ACAGGTTCTGCAGGGAAAGG	ADAD1
sg_00751	GTACTCCGTGAGCAAGGACA	ADAD2
sg_00752	GAGGGCGCCACGTAGCACAC	ADAD2
sg_00753	TCCCTCAACACCGAGACCTG	ADAD2
sg_00754	TCACCTACCTACGCTCAGGG	ADAD2
sg_00755	ACAGAGATCCCGCGTGCCAG	ADAD2
sg_00756	GGAGACTGTAAAACTTGCCG	ADAL
sg_00757	TATGTGGAATCTATACTTGA	ADAL
sg_00758	ACTAATGGATCCATTCAAGT	ADAL
sg_00759	TCAGATGACTGTGATTGACA	ADAL
sg_00760	CTTCCTGACAGAATCGGGCA	ADAL
sg_00761	TGTCCGAGGCCAATGCAGAG	ADCK3
sg_00762	CCTGGCTAAGATCTTCGAGC	ADCK3
sg_00763	AGCCGGCCAATCCTCGTCAC	ADCK3
sg_00764	GCTCCTGCCTACGTGGCCAG	ADCK3
sg_00765	GGAGTGTGACTACCAGCGAG	ADCK3
sg_00766	CCCAGACGAAAGGACCACCA	ADCY1
sg_00767	GCTGCATTGAGGACCGACTG	ADCY1
sg_00768	CAAGTTCGATGAATTAGCCA	ADCY1
sg_00769	GCCAGCGACCGCCGAACAAG	ADCY1
sg_00770	GCAGGACGACCACACTCCTG	ADCY1
sg_00771	GCACAGGGAATGTTAACGAA	ADCY10
sg_00772	AGAAAACAGCCTACGAGCTG	ADCY10
sg_00773	GAGACTTTCCCACCAAATGC	ADCY10
sg_00774	AAATAAAGTCATGACACTGT	ADCY10
sg_00775	GATCAGAGAGCAGTTAAGGT	ADCY10
sg_00776	TGAAGCGGCATACAAACGTG	ADCY2
sg_00777	GTCACATAATACTTGAACGC	ADCY2
sg_00778	GAATGGCGCTTATAAAGTGG	ADCY2
sg_00779	TGAGAGAGATCCGTGGCCAG	ADCY2
sg_00780	AAGAGGAAGAACGATACCTA	ADCY2
sg_00781	CCACCGTGTCACTAGCCGCG	ADCY3
sg_00782	AGAAAAGTGCCTCTTACCCG	ADCY3
sg_00783	GGCGGACTCTCGCTCAAGCA	ADCY3
sg_00784	GGATCTTAATCCGCAGCTGG	ADCY3
sg_00785	GGCTGACCGCAAGCACCGCA	ADCY3
sg_00786	TGGAGGCAGGCGGTGTACCA	ADCY4
sg_00787	GCCACCAGGCCAGACAGTGC	ADCY4
sg_00788	TTCATCATCTAGTCCCCGGG	ADCY4
sg_00789	GCCCAGCGCGCACAGCACAG	ADCY4
sg_00790	GTGGCCCAAGATACAGCCCG	ADCY4
sg_00791	GGATACTCACTGGGGCACGA	ADCY5
sg_00792	TAGACGCATCCACATCACCA	ADCY5
sg_00793	GATGAGGATCACGCCGACGG	ADCY5
sg_00794	GGGAGACCTCAGCCGGATAG	ADCY5
sg_00795	GACCCACCTCCACCGAGCGA	ADCY5
sg_00796	TTGGCCTGGCAACTTAACCG	ADCY6
sg_00797	AGGCAACGTAGGCTCCGAAG	ADCY6
sg_00798	GCAGTGTTGCCCGAGTGATG	ADCY6
sg_00799	CACCATGAGCCCCACGAACA	ADCY6
sg_00800	AAGCATGACAATGTCAGGTA	ADCY6
sg_00801	GGTGTTCGACGCATGGACAA	ADCY7
sg_00802	AGAGGCACCAGAATGTCAGG	ADCY7
sg_00803	GCGTGGGTAGGCAGCGACAC	ADCY7
sg_00804	CACTGCTCACGCTCTCACGG	ADCY7
sg_00805	GGAACTTGGAAAGGCATCAG	ADCY7
sg_00806	ACCTGACGTTCTCATAGCGA	ADCY8
sg_00807	GATTATGCTGCACTCGGCTC	ADCY8
sg_00808	GATTGGAATCCACTCCGGCT	ADCY8
sg_00809	GCTGCAGGTCATCCTCCAAG	ADCY8
sg_00810	TGGGGGCTATAGCTACCGAG	ADCY8
sg_00811	GGGAGACTGTTACTACTGCG	ADCY9
sg_00812	GCTACCACGTCACTGCATCG	ADCY9
sg_00813	TGGGGCAATCCATTATGCAC	ADCY9
sg_00814	ATACTTGCTTATCTCAAGTG	ADCY9
sg_00815	GAGATCCAGACTGATCGTCA	ADCY9
sg_00816	CCATGGTACCACTAACCACG	ADH1A
sg_00817	ACAGACTTTCTCTAGAGGCG	ADH1A
sg_00818	CACACTGAGGAATAGCGAGT	ADH1A
sg_00819	CCAGTGTAAGCAATCCTCAG	ADH1A
sg_00820	TGGGGCAGCCAGAATCATTG	ADH1A
sg_00821	TGGAGCAGCCAGAATCATTG	ADH1B
sg_00822	CACCTTCTCCCAGTACACGG	ADH1B
sg_00823	CCAGGTTGCCACTAACCACG	ADH1B
sg_00824	TCGAGAATCCACAGCCAATG	ADH1B
sg_00825	CGAACTTCATAAGCCTTAGG	ADH1B
sg_00826	AACACAGCACAGGTAGACCC	ADH1C
sg_00827	AGGTGCTGACGCCGACGAAG	ADH1C
sg_00828	AGCAGCCAGAATCATTGCTG	ADH1C
sg_00829	GCCGGCATCGTGGAAAGTGT	ADH1C
sg_00830	AATTGATGCAGCCTCGCCCC	ADH1C
sg_00831	AAGACAGCACAAGTCGAACC	ADH4
sg_00832	AAATTTAGAATCGATAACAG	ADH4
sg_00833	AGTGTACTGAGAGAATGTAC	ADH4
sg_00834	AGAGTTTGTCTGCTTGGATG	ADH4
sg_00835	GGTTGAAGTAGCTCCCCCCA	ADH4
sg_00836	TCAGGGTATAGGCATCGGTG	ADH5
sg_00837	TGCTTCCCGGATCATTGGTG	ADH5
sg_00838	AGTGGGATGACAGTGTCACC	ADH5
sg_00839	GACTCCTCCCAGACCAAAGA	ADH5
sg_00840	CTCCATAGAGGAGATAGAGG	ADH5
sg_00841	AAAGTATGCCTAATTAGCTG	ADH6
sg_00842	CCTTCATGGCCCAAGATGGT	ADH6
sg_00843	GAGGTACATTCTCCACACTG	ADH6
sg_00844	TCCATACAGGTTGTGGCCAC	ADH6
sg_00845	GACATCCACTCCAATGATCC	ADH6
sg_00846	CAGGCCAAAGACGACGCAAG	ADH7
sg_00847	TACATTTACCGAGTACACAG	ADH7
sg_00848	CTTGGGACTGATACACTCAG	ADH7
sg_00849	ACTGGGATTGTAGAGAGCAT	ADH7
sg_00850	GCATTGCATTCTCTACATTG	ADH7
sg_00851	AACCGGGAGTGAAACTACTG	ADHFE1
sg_00852	GGATCAATCAGTCCCAGTGT	ADHFE1
sg_00853	ATCACACGGCCTGCGTACCA	ADHFE1
sg_00854	TGTCGGTGGTGGCTCTACCA	ADHFE1
sg_00855	ATATGGAGCAGCAGTTACAA	ADHFE1
sg_00856	TGGTATATGGACGACGCCCC	ADI1
sg_00857	CTAGATTAAGATGTTCTACG	ADI1
sg_00858	GCAGTGGGTACTTCGATGTG	ADI1
sg_00859	TATGGTTATGATGTCCATCC	ADI1
sg_00860	GCTCGGGGTGCTCTACTGGA	ADI1
sg_00861	TAGGCAAAGTAGTACAGCCC	ADIPOQ
sg_00862	GAATGCTGAGCGGTATACAT	ADIPOQ
sg_00863	TGGATTCCCGGAAAGCCTCG	ADIPOQ
sg_00864	GTGGTTTCCTGGTCATGACC	ADIPOQ
sg_00865	TAAAGCGAATGGGCATGTTG	ADIPOQ
sg_00866	CCTGCAAGCCCACCACGCCA	ADIPOR1
sg_00867	CCAGGACACAGACGATGGAG	ADIPOR1
sg_00868	GACAACGACTATCTGCTACA	ADIPOR1
sg_00869	AACATCTGGACCCATCTGCT	ADIPOR1
sg_00870	GGATTGCTCTTCTAATTATG	ADIPOR1
sg_00871	ACAGGAAGAATACACAACCT	ADIPOR2
sg_00872	CAGTCTGGTAGTACATCATG	ADIPOR2
sg_00873	TGTCATAGACTGGATTACTC	ADIPOR2
sg_00874	ATGATGGGCTTGTAAGAGAG	ADIPOR2
sg_00875	AAGTAGATGAAGCAAGGTTG	ADIPOR2
sg_00876	ACAGCAGAGATGTCAAGCAG	ADK
sg_00877	GTAGTAATGAGCATCCACAT	ADK
sg_00878	AAAGTCGAATATCATGCTGG	ADK
sg_00879	TCTGGAGAAAAACTGGATGT	ADK
sg_00880	CAGCAGCAAGATTAGCTATG	ADK
sg_00881	CTGCATGGACAAGCTAGACG	ADO
sg_00882	CGATGTTCAAGTCCTCGGCG	ADO
sg_00883	CTACATGCACATCTACGAGA	ADO
sg_00884	ATCCCGCTGCACGACCACCC	ADO
sg_00885	CCCGGGAGCGAGAAGCCGTG	ADO
sg_00886	GCTGGCCAGTATGACTAACA	ADPGK
sg_00887	AAGATGAATCGGTTGGCATG	ADPGK
sg_00888	CCATCATGTGCAATCCAGAG	ADPGK
sg_00889	ACTCTCTTACAGCACTATGT	ADPGK
sg_00890	TCCACTTCCTGCAATGACTC	ADPGK
sg_00891	AACATCTGCGATGACGCCAA	ADPRM
sg_00892	TTGTTATGGACATGTTCAAG	ADPRM
sg_00893	ATGAACCGGAATTTAGGGAA	ADPRM
sg_00894	CCATTAAACTGGACAAACTG	ADPRM
sg_00895	CCAAGCTGAAGGACACAACA	ADPRM
sg_00896	CTGTAGCGGGTCCATGACAA	ADSL
sg_00897	AAATGTGTGAAACCTAATGT	ADSL
sg_00898	ACAGGTATAAATTCCGGACA	ADSL
sg_00899	CAGTGGTACCCTTTACTCCC	ADSL
sg_00900	TATGTTGGAGACAATACTGT	ADSL
sg_00901	ACGTCACCTATGTTCTGCGG	ADSS1
sg_00902	AGTGGGAAACGTACCAAGGT	ADSS1
sg_00903	ACTCATCAAAATCTGACAGG	ADSS1
sg_00904	CCTCAAACAAGCCTGGCAAG	ADSS1
sg_00905	GACCGGCTCCCGCGTGACGG	ADSS1
sg_00906	TGACAGAGCTCATATTGGTA	ADSS2
sg_00907	TATGGAAAAGATTAAACCAA	ADSS2
sg_00908	ACTTTGATGGCTTCTCTGAG	ADSS2
sg_00909	GGTGTGGTAATTCATCTACC	ADSS2
sg_00910	GGGCGACGAAGGCAAAGGGA	ADSS2
sg_00911	GCCACTCCCTGTGCCGTCAG	AFMID
sg_00912	TCTGGACAAACGCAACGCTG	AFMID
sg_00913	AGTCGGACAACCCATCGGCT	AFMID
sg_00914	GGCCGACTGGACCAAGCATG	AFMID
sg_00915	CCCCGGCTGAGTGTCCACAC	AFMID
sg_00916	GGGCCAAGTGTTGACGACCA	AGA
sg_00917	TGGAGGGCATTAGCATCTGG	AGA
sg_00918	CCAGATCCCTCAAAATACTG	AGA
sg_00919	TGCAGCACTACTATGGATGT	AGA
sg_00920	CATACTTTGAGCAAATGTGG	AGA
sg_00921	GCAATGACCGGCCTTCGATG	AGK
sg_00922	TGTTCTTCGACGAACAGATG	AGK
sg_00923	GCCAGATAAATGTAAAATCG	AGK
sg_00924	ATAGAGCCAATGGCCTCCCC	AGK
sg_00925	AAGTGGAAACAAAGTCCAGT	AGK
sg_00926	AGTTATCAAGACGTACTCCC	AGL
sg_00927	ATGCGTAATATCCATAAACA	AGL
sg_00928	AAACACGAAACCTTATAGGA	AGL
sg_00929	AAGTTTACTGATAGCACACC	AGL
sg_00930	CAGCACCAACACGTAAAATG	AGL
sg_00931	GACAGTCAATCCTAGCACGG	AGMAT
sg_00932	CCGGCCGGGCCACGAACTCG	AGMAT
sg_00933	TTGCAGACTGACATTACCCA	AGMAT
sg_00934	GTGGTGCAGATTGGCATCCG	AGMAT
sg_00935	CATAGGCCTCTTGAATTCGC	AGMAT
sg_00936	GCTTACCATGAGCCATACGA	AGMO
sg_00937	ATGAACAGCATATACTGAAG	AGMO
sg_00938	GAATCAGTTCCAAAGGACCA	AGMO
sg_00939	TCCATATGGAAAATAAGTGA	AGMO
sg_00940	GACAGACTGTCTCAGTGCTG	AGMO
sg_00941	GAGGGAACGAGAAACCACAA	AGPAT1
sg_00942	CATCGACCGGAAGCGCACGG	AGPAT1
sg_00943	CCTGTACGGGATCCGAGTGG	AGPAT1
sg_00944	GTCCTCGCACGGCACACACA	AGPAT1
sg_00945	TGCCAAGCGCGAGCTACTGT	AGPAT1
sg_00946	GGCCTCATCATGTACCTCGG	AGPAT2
sg_00947	AAAGTGTGGATCTATCCCGA	AGPAT2
sg_00948	GCTGCGTGCAGATCGCCAAG	AGPAT2
sg_00949	GCCGGACGGTGGAGAACATG	AGPAT2
sg_00950	CCGGCCTACCCATCATGTCC	AGPAT2
sg_00951	GAACAGTGTACACTCCGTGC	AGPAT3
sg_00952	GGACTACCCCGAGTACATGT	AGPAT3
sg_00953	TACCACGTCCAGCCGATGAG	AGPAT3
sg_00954	CAAGCACCGCGTTAGCATGG	AGPAT3
sg_00955	CCCCCGGAGGCACTTGACTG	AGPAT3
sg_00956	GTGGGAGCAGGATCGCAAGA	AGPAT4
sg_00957	CCTATGTCCCAATTATCGGC	AGPAT4
sg_00958	ACAGCCCAAAGCGTTCGGAC	AGPAT4
sg_00959	GGTGTTGATGATTAGCCCTG	AGPAT4
sg_00960	CACCTGTTGCCACGAACCAA	AGPAT4
sg_00961	GCAAAGTAACACCCATACAA	AGPAT5
sg_00962	CTACTGCGTCTACCAGAGCA	AGPAT5
sg_00963	AAAATCACAAGATACATCTG	AGPAT5
sg_00964	GACCCCCCAGGCCAACACGT	AGPAT5
sg_00965	TTAGCAAATCATCAAAGCAC	AGPAT5
sg_00966	GTATCATACCAATTGGTGGT	AGPS
sg_00967	TCCATGAGGCGAATAGATGC	AGPS
sg_00968	CAATTTGACAGCTCATGTAG	AGPS
sg_00969	GAATATCTATGGCAATATCG	AGPS
sg_00970	GTACCAATGAGTGCAAAGCG	AGPS
sg_00971	GCTGCTGTTCTTAACCCACG	AGXT
sg_00972	AGGCTCCAGCACATTGACCA	AGXT
sg_00973	TTGCCGGTCCATGTAAAGGG	AGXT
sg_00974	AGCAAGGATATGTACCAGGT	AGXT
sg_00975	AAGTGGCTGGCCAACTTCTG	AGXT
sg_00976	GCACTGGAGAATCTCGACAG	AGXT2
sg_00977	AAACGTAGGGACCTACAAGA	AGXT2
sg_00978	GGGATTGTTACTGTCAGTGT	AGXT2
sg_00979	CAGGACACGGTTGTAGCCAA	AGXT2
sg_00980	CATATTCATGCATTGGAGGG	AGXT2
sg_00981	TGGCTGCCTGCACATGACCG	AHCY
sg_00982	AACATGATTCTGGACGACGG	AHCY
sg_00983	GATGTCAATACAGCCTGTGG	AHCY
sg_00984	GAGGTTGTGGACCCCAGTCG	AHCY
sg_00985	TGACCCCATCAACGCACTGC	AHCY
sg_00986	TCTGGCTGTTCTATAGATCC	AHCYL1
sg_00987	ACTCAGGAAACGTGCTCAGG	AHCYL1
sg_00988	AGATGTTACAAGCAGACCAG	AHCYL1
sg_00989	TGAACTGTAGCTGTCAGTGG	AHCYL1
sg_00990	GATGTTTGGTGGGAAACAAG	AHCYL1
sg_00991	CACCAGCGGCACCGCGACGG	AHCYL2
sg_00992	GGAAAGCAAGTGGTAGTCTG	AHCYL2
sg_00993	TGATGATGAGACATCGCCCA	AHCYL2
sg_00994	TGCAGGCAGCCCATCGGCAC	AHCYL2
sg_00995	TGTACCAACTGTCCAAAGCT	AHCYL2
sg_00996	GAAAGAGGAGGTCGCATGTA	AIFM1
sg_00997	TCAATTACGATTATCGGTGG	AIFM1
sg_00998	CTGCCTCATATTGAGAATGG	AIFM1
sg_00999	GGCCTACAAGACTATGAAAG	AIFM1
sg_01000	ACAAGACAAATGGCTAGCTC	AIFM1
sg_01001	CCAGCGCTCACGGTTCATCG	AIFM2
sg_01002	GAGTGAATGAGAGTGACCTG	AIFM2
sg_01003	TACTCTCGATACTCATTGAG	AIFM2
sg_01004	TTCAAGGACAACTTCCGGCA	AIFM2
sg_01005	CACATTACCTGTCTCCACGG	AIFM2
sg_01006	CAGCCCTCAGGATTGCGTGG	AIFM3
sg_01007	GCCAGAGGATGCCAATCGCG	AIFM3
sg_01008	AGTGGACGTGAGAACTAAGA	AIFM3
sg_01009	CGTGCACAGGACGATCCGGT	AIFM3
sg_01010	GTGCGGACACTTATGGCCCA	AIFM3
sg_01011	GATTGATGGCTACCCGCGGG	AK1
sg_01012	TCCACATACAGCAGCAGTGT	AK1
sg_01013	GCCCTGAGACCATGACCCAG	AK1
sg_01014	CTACACCCACCTCTCCACCG	AK1
sg_01015	ATGTCCAACACTGTCTCCTG	AK1
sg_01016	GTGAGGCAGGCAGAAATGGT	AK2
sg_01017	AGGCTGATTCACCCCAAGAG	AK2
sg_01018	ATGGATGCTGGGAAACTGGT	AK2
sg_01019	TGTCTGCCATTTAGCTACTG	AK2
sg_01020	TTCGGATCAGCAGAGAGTCT	AK2
sg_01021	AATGTTATAGACTCGGCCAC	AK3
sg_01022	GAGCTGAAGCACCTCTCCAG	AK3
sg_01023	AGATGATGTCATGACTCGGC	AK3
sg_01024	GATCTGATAAGCTCTATCTA	AK3
sg_01025	TGTAGTGATGCGCGACGACA	AK3
sg_01026	TCCGAGTTGGAGAACAGGCG	AK4
sg_01027	GAGAACATCAAGGCCAGCAC	AK4
sg_01028	CTGGGCGATCCTCTGGCACA	AK4
sg_01029	ATTAGGACAAGCCGAAGCCC	AK4
sg_01030	GGTCTCCAGCATCTCTCCAG	AK4
sg_01031	CAGGAATACCACCAAATCGG	AK5
sg_01032	AATTATACAGCAGTACCTGT	AK5
sg_01033	TCCTGGAAGTATTTAACCAA	AK5
sg_01034	TGAGACTGCAGAGTTGATTG	AK5
sg_01035	ACCTTACCTCCACTAAATGG	AK5
sg_01036	CAGGGAAGAAATCACAACCA	AK6
sg_01037	GATAACCAAATGAGAGAAGG	AK6
sg_01038	TGTACGAAAGACTTGAAACA	AK6
sg_01039	TTGTCTTACAGGTACACCAG	AK6
sg_01040	GTGGGTGATTTAGCTCGAGA	AK6
sg_01041	ACTGCATCACATCCAACTGA	AK7
sg_01042	CCCGCGGCCTGACTTTGCGG	AK7
sg_01043	AGAAAATGCATACCTAACCA	AK7
sg_01044	ACTGTCGACGGTGATGACTT	AK7
sg_01045	GAGAGCATGGAGCAGAATGC	AK7
sg_01046	TGGTAGAAGACGTCCACACA	AK8
sg_01047	TTCGGGTGGCCAGTCAAAGG	AK8
sg_01048	CTGTGGGCAACTGCTGAAAG	AK8
sg_01049	AGGGGATGGGATCTTCGGGC	AK8
sg_01050	CTGGAGCACTCAGCACAACT	AK8
sg_01051	TACTGCATGGGAGTTAACTG	AK9
sg_01052	ACATATACAGTAGAGACCAG	AK9
sg_01053	GAGGCATCTCACGATACCCG	AK9
sg_01054	AACTATGTGTGGAAGACAGT	AK9
sg_01055	CCTGGTGCCCCAAAATATGG	AK9
sg_01056	GTTAAGTATGCCCTTAGCGT	AKR1A1
sg_01057	CAAGACAGCTGGACGCACGG	AKR1A1
sg_01058	TGTTTGTGACATCCAAGCTG	AKR1A1
sg_01059	GGCTGTCTCTCACTCAGGCG	AKR1A1
sg_01060	CCACTACAAGGAGACTTGGA	AKR1A1
sg_01061	CCCTCTCGCTGGCTTAGCTG	AKR1B1
sg_01062	CATGGGCACAGTCGATGTGG	AKR1B1
sg_01063	TGGACCTCTACCTTATTCAC	AKR1B1
sg_01064	CCTTCCAGGTACCCAACCCC	AKR1B1
sg_01065	GAGATGATCTTAAACAAACC	AKR1B1
sg_01066	AGAGAAGGCTGTGAAGCGGG	AKR1B10
sg_01067	GATAAAGGTAATGCCATCGG	AKR1B10
sg_01068	AGAGCTTCTCGATCTGGAAG	AKR1B10
sg_01069	TATTTACCTTCCAAGTGCCC	AKR1B10
sg_01070	GTGTCACCCATACCTCACAC	AKR1B10
sg_01071	AGAAATAGGCACAGTCAATG	AKR1B15
sg_01072	GATAAAGGTAATATGATCAG	AKR1B15
sg_01073	GTGTCACCCATACCTCACGC	AKR1B15
sg_01074	AGAGAAGGCTGTGATGCGGG	AKR1B15
sg_01075	AGAGCCTCTCGATCTGGAAG	AKR1B15
sg_01076	AATGAGCAGAATCAATATGG	AKR1C1
sg_01077	CTGGAAAATGAATAAGGTAG	AKR1C1
sg_01078	GGGTGTCCAACTTCAACCGC	AKR1C1
sg_01079	CCAAACACTCACCTCCCATG	AKR1C1
sg_01080	TGGCACCTATGCGCCTGCAG	AKR1C1
sg_01081	CATGTGCAGAATCAATATGG	AKR1C2
sg_01082	GGATCATCTCCAGCAGCCTG	AKR1C2
sg_01083	CTGGAAAATGAATAAGATAG	AKR1C2
sg_01084	GGATCTCTGTGCCACATGGG	AKR1C2
sg_01085	AAGGCTGGTCGGACCAACTC	AKR1C2
sg_01086	AATGAGCAGAATCTATATGG	AKR1C3
sg_01087	AGTGGATCTCTGTACCACCT	AKR1C3
sg_01088	CAACTCTGGTCGATGAAAAG	AKR1C3
sg_01089	GGGTGTCAAACTTCAACCGC	AKR1C3
sg_01090	TGGCACCTATGCACCTCCAG	AKR1C3
sg_01091	GGATCTCTCTGCCACATGGG	AKR1C4
sg_01092	AATAAGCAGAATCAATATGG	AKR1C4
sg_01093	TCCCAATGGCTCTCAAGGTA	AKR1C4
sg_01094	GGGTGTCAAACTTCAACTGC	AKR1C4
sg_01095	AAGGCTGGTTGGACCATCTG	AKR1C4
sg_01096	GATCCACATAATCTAGCTGG	AKR1D1
sg_01097	TTGGCTGGGTGAAATACGGA	AKR1D1
sg_01098	AGGGTACCGACATATTGATG	AKR1D1
sg_01099	TAGGTACCAAGTCCGATGAT	AKR1D1
sg_01100	GACATTTACTCTACAGGCGA	AKR1D1
sg_01101	AGTGGCTTGAACCTCAACCC	AKR1E2
sg_01102	TGAAAGAGGCCATTGACGCA	AKR1E2
sg_01103	ATCCGTTGCAAGATCAAGGA	AKR1E2
sg_01104	CCTGCACTCGAGGATGTGAG	AKR1E2
sg_01105	GAACGGTACCTTGAAACCCA	AKR1E2
sg_01106	AGGCCGTGTCCAGTTCGGTG	AKR7A2
sg_01107	TACCTACACGCACCTGACCA	AKR7A2
sg_01108	GCATGTACAACGCCACCACC	AKR7A2
sg_01109	CCCAGCACCGAGGCGACCCG	AKR7A2
sg_01110	ACCCATGCAGGGCAAGTTCG	AKR7A2
sg_01111	GGCTCTCACCTGGTACACAG	AKR7A3
sg_01112	TTCAGGGAGTTCCCAAACAG	AKR7A3
sg_01113	ACCTGAGCAGGGCAAGTTCG	AKR7A3
sg_01114	ACGGCCTTCGTGTACAGCGA	AKR7A3
sg_01115	CTGGCATATGCAGGTAGAAG	AKR7A3
sg_01116	CAGGTGCATGTAGATAGAAG	AKR7L
sg_01117	TAGGTGGTGACTCTACTGTT	AKR7L
sg_01118	ACGGCCTTCCTGTACAGCGA	AKR7L
sg_01119	TGACCTCGGCCGCCCTCCGG	AKR7L
sg_01120	AAGGACGGGAAACAGCCCGT	AKR7L
sg_01121	GCCCCGTCGGACATGATGGA	ALAD
sg_01122	TAGCTCATCACCGATACCTA	ALAD
sg_01123	AGACTCACGTGACAAAGATG	ALAD
sg_01124	CCCTGCCCCTAGGACGAGCG	ALAD
sg_01125	CACACAGGTATGGTGTGAAG	ALAD
sg_01126	GTCATTGGCCACAAAGCACG	ALAS1
sg_01127	TGGTGCAGTAATGACTACCT	ALAS1
sg_01128	GTGGATGAGGTCCACGCAGT	ALAS1
sg_01129	GCTGCAGTGGACAATGCCCG	ALAS1
sg_01130	GAAACGATCATACTGAAAAG	ALAS1
sg_01131	GTAGGACTGTATGGGTCCCG	ALAS2
sg_01132	ATCCAAGGTATCCGTAACAG	ALAS2
sg_01133	ACTCATATACATACCATCCA	ALAS2
sg_01134	TGTGTGGCTTGCAAGACCTG	ALAS2
sg_01135	AGGGATATGCATCAGCCCAG	ALAS2
sg_01136	ACTGTCTGGATCAACGCCCA	ALDH16A1
sg_01137	GCTGTTCGAGAGGTTCGAGA	ALDH16A1
sg_01138	GACGCCGCCTGGTCCGACCG	ALDH16A1
sg_01139	GCAGGGTTGAGGGAACAGCG	ALDH16A1
sg_01140	CTGTCCCGAAGGTACCTCCG	ALDH16A1
sg_01141	GAAGCATGCCAAGAGAATCG	ALDH18A1
sg_01142	TGCCAATGGAACCCACCCAA	ALDH18A1
sg_01143	GGTAAACATAGCCTCATACA	ALDH18A1
sg_01144	GCAGCTTTGGCTATCGCAAG	ALDH18A1
sg_01145	CAGGCTGTTCAATTTGGATG	ALDH18A1
sg_01146	TGGATGCGGCTATACAACAC	ALDH1A1
sg_01147	GAATGGCATGATTCAGTGAG	ALDH1A1
sg_01148	AGCATCCATAGTACGCCACG	ALDH1A1
sg_01149	AGCCTTCACAGGATCAACAG	ALDH1A1
sg_01150	GCATCAGCTAACACAATGCA	ALDH1A1
sg_01151	AGATATAGACAAAGCAGTGC	ALDH1A2
sg_01152	CTTGATTGAAGAACACACCC	ALDH1A2
sg_01153	ACCATGGAATCCCTAAATGG	ALDH1A2
sg_01154	TGCATTCACAGGGTCTACTG	ALDH1A2
sg_01155	AGTGGCAGAACTCAGAGAGT	ALDH1A2
sg_01156	TGGATGCCCTGAGTCGTGGG	ALDH1A3
sg_01157	TCTGGTCGCTCAGCCCGACG	ALDH1A3
sg_01158	AGGTCAAGTTCACCAAGGTG	ALDH1A3
sg_01159	TGGAGGCTGCCGTGCAACAC	ALDH1A3
sg_01160	CGTCCGCACACACGATGCAG	ALDH1A3
sg_01161	ATTGTCCAAGGTCTCGAGTG	ALDH1B1
sg_01162	TGACCAAGGGGAAGTTCCAC	ALDH1B1
sg_01163	GACGGTCAACCCTACCACCG	ALDH1B1
sg_01164	GATGAGGGAGGCCAAATACA	ALDH1B1
sg_01165	TGCTGACATGGAGCATGCCG	ALDH1B1
sg_01166	ACTGCTCCCTAGGCACCGAG	ALDH1L1
sg_01167	CTGGATGGACATGCCCACGT	ALDH1L1
sg_01168	CGGTATTCAAGTACTCCCGG	ALDH1L1
sg_01169	TCATCAGGGGATAGTTCCAG	ALDH1L1
sg_01170	GCCGTGAGGCTGATCGCTGA	ALDH1L1
sg_01171	ATAATTGATAGTCCAAAGCA	ALDH1L2
sg_01172	TCTGTGCCATTATTATTCCC	ALDH1L2
sg_01173	ATAGACAGCCCCTGAATCAA	ALDH1L2
sg_01174	ACCCGTTGAAAAGTACTGAG	ALDH1L2
sg_01175	TCTTCTGGCTGGGGTATACG	ALDH1L2
sg_01176	ACACACGCCATGAACCTGTG	ALDH2
sg_01177	GCCGCATGGACGCATCACAC	ALDH2
sg_01178	TGGATTACGCGGCCAATCTG	ALDH2
sg_01179	AGCCTTGGCAACTGGAAACG	ALDH2
sg_01180	GGACCATGTCCAAATCCACC	ALDH2
sg_01181	CTGTACCCAGTAATCAATGG	ALDH3A1
sg_01182	AGTTCCAGGTGCCAATGACG	ALDH3A1
sg_01183	ACTGTTCATGAATTTCCCCC	ALDH3A1
sg_01184	TCCCAGCTCCAGCGTGACAG	ALDH3A1
sg_01185	TGAATGGAACGCCTACTATG	ALDH3A1
sg_01186	GCAGCGATGGCTCCTATCAG	ALDH3A2
sg_01187	CCCCTCAGACGCATAACCTG	ALDH3A2
sg_01188	TCCCAGTTCAAGAGTCACAG	ALDH3A2
sg_01189	GATGAGGCCACACGCTACAT	ALDH3A2
sg_01190	TGGTGGTGTTGAGGAAACCA	ALDH3A2
sg_01191	GCAGCGAGGGCTCCCACGAG	ALDH3B1
sg_01192	GCTGCATAGGACGTAGTCGG	ALDH3B1
sg_01193	CCTGCAGTCAGCCTTCGAGT	ALDH3B1
sg_01194	GACAGGTGTCAGGTGCTTGG	ALDH3B1
sg_01195	CGAGGTGCTGCCCCAATACG	ALDH3B1
sg_01196	AAGCCGTCAGAAATCAGCCA	ALDH3B2
sg_01197	TGGTCCTCATCATCGCACCC	ALDH3B2
sg_01198	GCTGCACAGGACGTAGTCAG	ALDH3B2
sg_01199	GCAGCTGCTAGAGCACAAGT	ALDH3B2
sg_01200	AGTTGTCGTCCACGTAGCAG	ALDH3B2
sg_01201	ACCAACAGCACGGTGTACCG	ALDH4A1
sg_01202	GGGTAAGACCGTGATCCAAG	ALDH4A1
sg_01203	GTGACAGTGTCCCCAAATAG	ALDH4A1
sg_01204	TCTACGTGCCGCACTCGCTG	ALDH4A1
sg_01205	GGAAGCCATCCCATGCGTGG	ALDH4A1
sg_01206	TAATGTCTCCGTAAACACGG	ALDH5A1
sg_01207	GGAGTTCATTACTTCGGAAG	ALDH5A1
sg_01208	GCTGCAGTCATCACCCCGGT	ALDH5A1
sg_01209	TGCTACAGCCTGGTCCACGT	ALDH5A1
sg_01210	ATAACATTGTATACACCTGA	ALDH5A1
sg_01211	AGTTAATCACATTGGAACAA	ALDH6A1
sg_01212	CATCTGGCATGACTACCCCA	ALDH6A1
sg_01213	CCATGGGAAACATCCAAAGG	ALDH6A1
sg_01214	GGAACATTAAACATCATCCA	ALDH6A1
sg_01215	AAAAACCTGAGAGTCAATGC	ALDH6A1
sg_01216	TCAATCAGCCCCAGTATGCG	ALDH7A1
sg_01217	ACTCACCAGTCGCCTCGCAG	ALDH7A1
sg_01218	ATTGAGCAGTGGAATCCCGT	ALDH7A1
sg_01219	AAGTGAGCAGGTCTTACCAG	ALDH7A1
sg_01220	TGGTGGAGCAGATATTGGGT	ALDH7A1
sg_01221	TTCTTACGACCCATCAACAG	ALDH8A1
sg_01222	TCTGCGTGCACTCTGACGTG	ALDH8A1
sg_01223	TGGGTGATCCGCTCAGCGGT	ALDH8A1
sg_01224	CAGGCCGAGTCTAAAGACCA	ALDH8A1
sg_01225	AGTAGAGTGGCAAATTCCAG	ALDH8A1
sg_01226	GAGCGGCTGCGACACGACGA	ALDH9A1
sg_01227	TCCAAGAGGCAATCTGAAAG	ALDH9A1
sg_01228	TCTGTGTCAGCATCCCGATG	ALDH9A1
sg_01229	ACTATGGAGTGCATCAACAA	ALDH9A1
sg_01230	ATGGCCAACTTCCTCACACA	ALDH9A1
sg_01231	TGAGACACTCTACCAGAAGG	ALDOA
sg_01232	TGACCCCAACAGGTAGACAA	ALDOA
sg_01233	GGCATAACGGGCCAGAACAT	ALDOA
sg_01234	ACGGAGCTGACTTCGCCAAG	ALDOA
sg_01235	GCACCAGACAGAGTTAGGAA	ALDOA
sg_01236	GCACCTCCTTGGTCTAACTG	ALDOB
sg_01237	TCCATCAACCAGAGCATCGG	ALDOB
sg_01238	AAAACACTGAAGAGAACCGC	ALDOB
sg_01239	GGTACCTATTGTTGAACCAG	ALDOB
sg_01240	TAGCGAGGCTGGATGGACAC	ALDOB
sg_01241	GCCCTGCGGATTGTAGCCCC	ALDOC
sg_01242	CAAGCGGCTGAGCCAAATTG	ALDOC
sg_01243	GGCATAACGGGCCAGCACGT	ALDOC
sg_01244	GTATACATGATGGTCACTCA	ALDOC
sg_01245	CCAGGATAAGGGCATCGTCG	ALDOC
sg_01246	GCATGGCCAACGACAGCGCG	ALG1
sg_01247	GTCATTGACTGGCACAACTA	ALG1
sg_01248	GCATAGCATTGGTAACACAC	ALG1
sg_01249	AGCAATGCTAGGCAGACCTG	ALG1
sg_01250	ACTCCGTACTGGAAAACTCG	ALG1
sg_01251	TGATCACTCCAATTGACACC	ALG10
sg_01252	CATTGCACAAAAGTTAACGG	ALG10
sg_01253	TCGCAACGCCCGGCTGAAGG	ALG10
sg_01254	GAAGCCACAAAATCCAAGGA	ALG10
sg_01255	CAAGACTCTCTGGATACTTG	ALG10
sg_01256	TGACCACTCCAACTGACACC	ALG10B
sg_01257	CATTGCACAAAAGTTAACTG	ALG10B
sg_01258	GGCGCTGCGAGAGCCCTACA	ALG10B
sg_01259	CAAGGTACAACCCAGAAACA	ALG10B
sg_01260	AGAAATCCCAGAAGGATGTA	ALG10B
sg_01261	CCCCCTATATACTTAAACAG	ALG11
sg_01262	GCAGCAGTCTGATTCCCCAA	ALG11
sg_01263	ACCGTTGACATTAACATCGC	ALG11
sg_01264	GAAAAATGGATCCTAGACTT	ALG11
sg_01265	CCATACTGCAATGCTGGTGG	ALG11
sg_01266	GCGAAAGCACGTAAACCGCG	ALG12
sg_01267	CTGTCCCTACACCAAAGTGG	ALG12
sg_01268	CAGAAGGACGCACGCGCCGA	ALG12
sg_01269	GCAGCTACGTACCTACAGGC	ALG12
sg_01270	TGACTGACTTACCTAAACAG	ALG12
sg_01271	ATGACTATGGCTTACGGCAA	ALG13
sg_01272	AAAAGGAAAGCCACTCGTAG	ALG13
sg_01273	AAGAGAAGTTATCATAGCTC	ALG13
sg_01274	AGATAATGGCTATGAAGACA	ALG13
sg_01275	GCTCCGAAATGGCCCGAAAG	ALG13
sg_01276	GTTCCATGGACGTTACGCCC	ALG14
sg_01277	TCACCACCTTGCACTCCATG	ALG14
sg_01278	GAAGCACTACCCATATTCGC	ALG14
sg_01279	GCCAGGACTGCTGAACCTCC	ALG14
sg_01280	TGATAGAGACCCTAGTAACA	ALG14
sg_01281	TGGACAGCGCACTACGACCC	ALG2
sg_01282	GGAGAGGGTTCATCTGATCG	ALG2
sg_01283	GCGCACGTAGGCGCAGACGG	ALG2
sg_01284	TGTTCAGGCTGGCTAGACGG	ALG2
sg_01285	GGCCCCAATTGACTGGATAG	ALG2
sg_01286	TATGACTATACCCAACTGCA	ALG3
sg_01287	GCCACCAGCAGCGTGTAGCG	ALG3
sg_01288	GCGGCTCTTCAATGACCCAG	ALG3
sg_01289	AGCGCCAGTTCACTGTCCAG	ALG3
sg_01290	CCGAGGCACTGACATCCGCA	ALG3
sg_01291	CAAAGTACGTGTGATAACCC	ALG5
sg_01292	GTAGGTGAGTCCCATATGCT	ALG5
sg_01293	ATCACTTCATAAGTGAACGC	ALG5
sg_01294	AGCAGTTGTAAATGCAACGA	ALG5
sg_01295	AATCAAATGGCTATAGCATG	ALG5
sg_01296	CAAATAATCCACGATCAACC	ALG6
sg_01297	ATTATTAATTGGATGTGACG	ALG6
sg_01298	TAGTCTATAAGAATAAGGCC	ALG6
sg_01299	TCATAATCACCAAACATAGG	ALG6
sg_01300	AAACTTACACATATGCACAT	ALG6
sg_01301	CTGTAGATGGGTCTATTCGA	ALG8
sg_01302	CGTGCGAGTCCCTTACTATG	ALG8
sg_01303	AAGAGTCGGGAAAAGACTTG	ALG8
sg_01304	TCCTAGAAAAGGCATATGGA	ALG8
sg_01305	GGCAACTTCAGAGTGGACGT	ALG8
sg_01306	GGAGCGAATGGCATATGCTG	ALG9
sg_01307	AGACATATAAGTGGATACAC	ALG9
sg_01308	GTCCATATACCATCCAGTCA	ALG9
sg_01309	CCATAAGAGAAGTCAGTGGT	ALG9
sg_01310	AACTCACCAGAAATAGTATG	ALG9
sg_01311	GAAACCTAATGTATGTAACC	ALKBH1
sg_01312	GATCCTGAATTACTACCGCC	ALKBH1
sg_01313	AAACTGCGTTGGGTGACCGT	ALKBH1
sg_01314	CTTGCTCTGAGAGGAAACCC	ALKBH1
sg_01315	GAGCAGAATGCATATAGAGC	ALKBH1
sg_01316	TGTGCCACTTCCCGAATACC	ALKBH2
sg_01317	AGGCAACGTATGGCGACGCT	ALKBH2
sg_01318	AGATGGCTGTGACCACATCG	ALKBH2
sg_01319	GGACTGTGTAACTGCAGTCC	ALKBH2
sg_01320	GAGGAGACAAAGAAAGCACA	ALKBH2
sg_01321	GTGGAGATGGCTCTTAGCAG	ALKBH3
sg_01322	AACCGCATTGAAGAGAACAC	ALKBH3
sg_01323	CCAGGATACAAACAGACCCT	ALKBH3
sg_01324	ACAATATGTTGACATACGTG	ALKBH3
sg_01325	AGCAACCAAGACTTACAGCA	ALKBH3
sg_01326	GGAGGATGGGCCTCTACCCG	ALKBH4
sg_01327	CAATGGCAGAGCCCCGCTCG	ALKBH4
sg_01328	CCCAGGAGTGATGCTGATCG	ALKBH4
sg_01329	CGACACATGGACAGCACGGT	ALKBH4
sg_01330	AGCTCTCCCAGTCTGGACGG	ALKBH4
sg_01331	ATCAACGACTACCAGCCCGG	ALKBH5
sg_01332	GAGGCGCGCAAGGTGAAGAG	ALKBH5
sg_01333	CCTGTACAACGAGCACACGG	ALKBH5
sg_01334	CGTGGACGAGATCCCCGAGT	ALKBH5
sg_01335	TCCCGGGACAACTATAAGGC	ALKBH5
sg_01336	GGGACATAGTAGATTACAGG	ALKBH6
sg_01337	GGGAGAAAGTTACAGAACTG	ALKBH6
sg_01338	GATGACCCTACAGAACAGGT	ALKBH6
sg_01339	CGTGAACCAGTATCTGCCTG	ALKBH6
sg_01340	CTGACAGTCGGGTAGTACAG	ALKBH6
sg_01341	AGTGATCGTATTCGTAGCGG	ALKBH7
sg_01342	CAGGTCCAGCACGTGCACGG	ALKBH7
sg_01343	GTGCACCAGCCGCATAACGC	ALKBH7
sg_01344	CGGCTACATCAAGCCCCACG	ALKBH7
sg_01345	GAGAGACAGAGAAGTCGCGC	ALKBH7
sg_01346	ATCACCAGCAAACTCCGACG	ALKBH8
sg_01347	AATGAGTACGGCTTGTTAGG	ALKBH8
sg_01348	AAAGATAAGCCATTATCTGG	ALKBH8
sg_01349	ATAGTGGCTGATATTGGATG	ALKBH8
sg_01350	TGATAAAGAAGCCTCACGGC	ALKBH8
sg_01351	TGTGTTGCGCAGGTCACGAC	ALLC
sg_01352	TGGCGGGGCAAAGTCTATGG	ALLC
sg_01353	AATTGACAAGAAAATAGTTG	ALLC
sg_01354	GCTGCTTGAATGGACACTCG	ALLC
sg_01355	ACAGACACCCCCAAAAGCGA	ALLC
sg_01356	ATCACCATTAGATACACCCG	ALMS1
sg_01357	ACATAAGCCAACAAGAGAGT	ALMS1
sg_01358	AAGAACAACTGACTTGTCCA	ALMS1
sg_01359	CTACTAGCTACTCAAATAGG	ALMS1
sg_01360	TAGGAACTAAGGGTAGCTGC	ALMS1
sg_01361	TCCATCTTCAGCATAACGAG	ALOX12
sg_01362	CCCCCATATCCGCTACACCA	ALOX12
sg_01363	ACTGGCTGGTGGACGACGCG	ALOX12
sg_01364	TGAAGCTCTTCCATCCCCGA	ALOX12
sg_01365	GACATCCTGAGCCTGCCCGA	ALOX12
sg_01366	GGACGGTGTATCGGGTATGG	ALOX12B
sg_01367	TCATCCGCCTGCACAAAGAG	ALOX12B
sg_01368	CAAGACGTGGGTACGCTATG	ALOX12B
sg_01369	GATGGATGGCTACGAGACCC	ALOX12B
sg_01370	TGCGATGCCTCCGCACCGGA	ALOX12B
sg_01371	TCCCCACCTGCGATACACCC	ALOX15
sg_01372	TGGAAGTACCGGAGTATCTG	ALOX15
sg_01373	GGATCCGTAGGCAAGAAAAG	ALOX15
sg_01374	GAAATCGCTCATCCACAGGG	ALOX15
sg_01375	TGTCCTTCTAGGCCGCACTG	ALOX15
sg_01376	GACAGCGGCGGATCAGGACA	ALOX15B
sg_01377	GCCGTGATCCACCAAGAACA	ALOX15B
sg_01378	AGGTGGAAGGCTTACAACCC	ALOX15B
sg_01379	GAACTCGGCATTGCGCACCC	ALOX15B
sg_01380	GCACATCAACACACTCGCCC	ALOX15B
sg_01381	GGATTCATACGACGTGACTG	ALOX5
sg_01382	AGATGGATGGAGTGGAACCC	ALOX5
sg_01383	TAGAGCGGGTCATGAATCAC	ALOX5
sg_01384	CTGGATCACCGGCGATGTCG	ALOX5
sg_01385	CAGATGTGTTCGCAGAAGGT	ALOX5
sg_01386	AAGTACTTTGTCGGTTACCT	ALOX5AP
sg_01387	AGAGCACAGCGAGGAAAGTG	ALOX5AP
sg_01388	GGCAGTGTAGACCCGCTCAA	ALOX5AP
sg_01389	ATAAAGTGGAGCACGAAAGC	ALOX5AP
sg_01390	CATCGTCACCCTCATCAGCG	ALOX5AP
sg_01391	GCAGCGTGTATCGAGTGTGG	ALOXE3
sg_01392	AGGGACAATGGCCTTACGCA	ALOXE3
sg_01393	ACGACAACTTGTGTAGACCA	ALOXE3
sg_01394	AAGTGGGATACACTACCATC	ALOXE3
sg_01395	GCGGCTAGATCGAATGGGCA	ALOXE3
sg_01396	TTGTCTACACTGTATGTCTG	ALPG
sg_01397	TGGCTCACTCACCGTCACCC	ALPG
sg_01398	GGAATGGCTGGCGAAGCACC	ALPG
sg_01399	GGCATGCTGCACCCGTGTGG	ALPG
sg_01400	GTTCCTGCTCAGCAGGAGCA	ALPG
sg_01401	CCGTTCGCAGACATACAATG	ALPI
sg_01402	ACCACGCACCCTCCACAAAG	ALPI
sg_01403	GCGGTTCACTGTGTGTGCGT	ALPI
sg_01404	CAGCCACCAGGATCCTAAAG	ALPI
sg_01405	CCTCCGCCAAGGATCACCTG	ALPI
sg_01406	GGCATGGTTCACTCTCGTGG	ALPL
sg_01407	GAGCTTCAAACCGAGATACA	ALPL
sg_01408	CATTGGCCTTCACCCCACAC	ALPL
sg_01409	AGAGACACTGAAATATGCCC	ALPL
sg_01410	CCCGTCACTCTCCGAGATGG	ALPL
sg_01411	TGAGCTGCGTAGCGATGTCC	ALPP
sg_01412	ACTGGGGCCTGAGATACCCC	ALPP
sg_01413	GGCGTGCTGCACTCGTGTGG	ALPP
sg_01414	CCAGGGCCTCGGCTGCCTCG	ALPP
sg_01415	CACAGGGTGCCCGGTATGTG	ALPP
sg_01416	GCGGCGTCTGTGCAAGCGGT	AMACR
sg_01417	GTCCTGTAAGTCGTATAGAA	AMACR
sg_01418	CGGGGCGCGTGTGGTACGCG	AMACR
sg_01419	AAGCCAAATAGTTGATATCG	AMACR
sg_01420	ATCAGCAGCTCGTAGAACTG	AMACR
sg_01421	GGAATTCGTGACCTGATACC	AMD1
sg_01422	AAGCTTGCTAGGGATTACAG	AMD1
sg_01423	CGACGCAAACCAAGGATCTG	AMD1
sg_01424	CAGTCAGCCAGATCAAACCT	AMD1
sg_01425	AGCAGGAAGCTTATGTACTC	AMD1
sg_01426	AGGAGGGATCCACTTTACCG	AMDHD1
sg_01427	CAGAAATGGGGAAATACACG	AMDHD1
sg_01428	GTTACAGATTAACTTCCATG	AMDHD1
sg_01429	CACTGAATGAGCCCCGCAGT	AMDHD1
sg_01430	TCTGGGAAATGTATTCTACC	AMDHD1
sg_01431	GAGGATCTGTGGGTGCGCGG	AMDHD2
sg_01432	CTTGTGATAAACCTCCGGTG	AMDHD2
sg_01433	TGAATCCGGGAGCCAAGATG	AMDHD2
sg_01434	GACATTGTCCAGGGGCCCGT	AMDHD2
sg_01435	TTCATCAGCCGGGAGAAGCG	AMDHD2
sg_01436	ACAGTAAGACCTATACCCAC	AMPD1
sg_01437	GCAGGTACATACTAGATCCT	AMPD1
sg_01438	CATTGAACTTATCAAAACGC	AMPD1
sg_01439	AAAATCAGGCACGGTCTGGT	AMPD1
sg_01440	GAAGGTTGTCTGTTCGGAAG	AMPD1
sg_01441	AGTGACTCGGACCTACAGTG	AMPD2
sg_01442	GACCTGCGCACGTCTATGGA	AMPD2
sg_01443	AGTGATGTGTACCGTACCAA	AMPD2
sg_01444	ATGTTGTAGAAATCTCGGTG	AMPD2
sg_01445	GAGACCCGGACCTATGAACA	AMPD2
sg_01446	TGATCCGGGAGAAGTATGCG	AMPD3
sg_01447	CACCTCACTTACTAAATCCG	AMPD3
sg_01448	CGGAGAAGCTAGCTTACGTG	AMPD3
sg_01449	AAAACTGAAAACTATCTGGG	AMPD3
sg_01450	GGTGGACACACACATCCATG	AMPD3
sg_01451	TGTAGCCACAGCGGGTCACG	AMT
sg_01452	TGACTGTCCCGGTACTGCAC	AMT
sg_01453	ACTGTCGCTGTTTACCAACG	AMT
sg_01454	CAAGATACTTGGTAGTGACC	AMT
sg_01455	CCAGGTACTACAGGCCGGCG	AMT
sg_01456	AACAGTAACTGGTTCCCGGA	AMY1A
sg_01457	AATCAACGAGGACATGGCGC	AMY1A
sg_01458	GACTAGATGCAACAATGTTG	AMY1A
sg_01459	GAACTATAATGATGCTACTC	AMY1A
sg_01460	AGGTCTGAAAGGGTTGTGAA	AMY1A
sg_01461	ATATGTATTGACGTACCTCC	AMY1B
sg_01462	GTCTTCTCGATCTTGCACTG	AMY1B
sg_01463	CAACGAGGACATGGCGCTGG	AMY1B
sg_01464	ATCCCAGAAGGTAAGTATAG	AMY1B
sg_01465	GTGACTAGATGCAACAATGT	AMY1B
sg_01466	TATTCCTCAAATACACAACA	AMY1C
sg_01467	GCTGTAATTAATCATATGTG	AMY1C
sg_01468	GGTCTTCTCGATCTTGCACT	AMY1C
sg_01469	GTGACTACTTTGGTAATGGC	AMY1C
sg_01470	TGTGGTAATGCTGTGAGTGC	AMY1C
sg_01471	ATAAGTATTGATGTACCTCC	AMY2A
sg_01472	GACTAGATGTAACAATGTTG	AMY2A
sg_01473	AGCTCCGAAGGGATTTGGAG	AMY2A
sg_01474	TGACAATCAACGAGGACATG	AMY2A
sg_01475	TGGTCTTCTTGATCTTGCAC	AMY2A
sg_01476	ATATGTATTGATGTACCTCC	AMY2B
sg_01477	GTGACTACTTTGGAAATGGC	AMY2B
sg_01478	GTGACTAGATGTAACAATGT	AMY2B
sg_01479	ATCCCAGAAGGTAAGAATAG	AMY2B
sg_01480	ATGACAATCAACGAGGACAT	AMY2B
sg_01481	AACAGAGGTGAACATACAAG	ANGPTL3
sg_01482	AGACTTTGTCCATAAGACGA	ANGPTL3
sg_01483	CAAAGACCTTCTCCAGACCG	ANGPTL3
sg_01484	ACAAAACTTCAATGAAACGT	ANGPTL3
sg_01485	ACTACAAGTCAAAAATGAAG	ANGPTL3
sg_01486	CACTAGAAACACCTACCGTG	ANGPTL4
sg_01487	GGCTCTCAGGGGCTAACGGG	ANGPTL4
sg_01488	GTGCTACTGAGCGCTCAGGG	ANGPTL4
sg_01489	GTAATTCAGAGGCGCCACGA	ANGPTL4
sg_01490	GAGATGAATGTCCTGGCGCA	ANGPTL4
sg_01491	GAGCACGAGCAACACAGTCA	ANKH
sg_01492	AGGCCGACTGATTCTCTGTG	ANKH
sg_01493	ACCATGTGGACGAGTCGGTG	ANKH
sg_01494	TGGGTCACATGCCATACGGC	ANKH
sg_01495	ACCCGTGAAGAACTTCATGA	ANKH
sg_01496	CAAGTCTCGCGCGTCCACTG	ANKRD23
sg_01497	CCTCCCACTCACCTTAACCA	ANKRD23
sg_01498	GGACCCCAATGCCCATGACA	ANKRD23
sg_01499	GAGCCTGGCCTAGTGACTGG	ANKRD23
sg_01500	GACCAGATGTCCTCCGCGGC	ANKRD23
sg_01501	TCACGGTGGATACCAGCACG	ANPEP
sg_01502	AGCACCCAGGTACTCCACGT	ANPEP
sg_01503	TGGCCGGCTCATCGAAGCAT	ANPEP
sg_01504	GGCCTGCCAGACTTCAACGC	ANPEP
sg_01505	GGTAATAGCCCGTCACATTG	ANPEP
sg_01506	AATCATGGCATATATAACGA	AOAH
sg_01507	GAAATAGTTACCTTCTACCT	AOAH
sg_01508	TGCTCAAGTTCACAACTCGA	AOAH
sg_01509	ACAGACTGTTCCATAGCTCT	AOAH
sg_01510	AAGAAACCACTGTAATCACA	AOAH
sg_01511	GCTGTATGATAAGCCAACTG	AOC1
sg_01512	GTCACTCATGAGTTAGCCCC	AOC1
sg_01513	GTGGCTTCAACTTCTATGCG	AOC1
sg_01514	GGCAACGCTGTGCTCTACGG	AOC1
sg_01515	CAGCATCTCGATGAGAAACA	AOC1
sg_01516	TATATGGATGTCCACCATCG	AOC2
sg_01517	AGTCTGCATAGTAGTGCCCA	AOC2
sg_01518	CATAGGCTATTCGCTCACCC	AOC2
sg_01519	CAACTACAATGGCTCTACCC	AOC2
sg_01520	GTCACATCCCGCATGTACGA	AOC2
sg_01521	TGTGTGTTTGAACAGAACCA	AOC3
sg_01522	TGCCGAGCTGATGTAGCCCG	AOC3
sg_01523	TGTTGCTTCTACAAGCACCG	AOC3
sg_01524	ACGACCCGCTATGTGGATGG	AOC3
sg_01525	TGGGGATAGAACTGTAGAGG	AOC3
sg_01526	GAGTTATGCATCTCATATGG	AOX1
sg_01527	GCCGCTGATACTAACAATTG	AOX1
sg_01528	GGGGTTCTACATACCCACAG	AOX1
sg_01529	GTGTTGGTGGAGCGTTTGGA	AOX1
sg_01530	GCACCATACAGAGAACAGAT	AOX1
sg_01531	GTACGGCGGCCAATACCGGA	APEH
sg_01532	GCAGTATGACTGGTATACCA	APEH
sg_01533	TATTATGTGGACCTCATCGG	APEH
sg_01534	GTGTGTCTCCGAGTGCGACC	APEH
sg_01535	TGCGTGCTGGATGTCGAGAG	APEH
sg_01536	AAAATACCTATAATACCCTC	APIP
sg_01537	GGAGGAATTAGCTTGAAGCA	APIP
sg_01538	TCATGAAAAGAGGAGTACAC	APIP
sg_01539	AAAAGGAACGAATTCAGGTA	APIP
sg_01540	CATCACAGCAGCTTTAGAGT	APIP
sg_01541	GGAGCTCTACCGCCAGAAGG	APOA1
sg_01542	GAGCACATCCACGTACACAG	APOA1
sg_01543	TTAGGGGACACCTACCCGTC	APOA1
sg_01544	GGAGATGAGCAAGGATCTGG	APOA1
sg_01545	TTGGGAAAACAGCTAAAGTA	APOA1
sg_01546	GACCGTGACTGACTATGGCA	APOA2
sg_01547	TGTGGGCAGGAGCTTTGGTT	APOA2
sg_01548	ACAGGCAAAGGAGCCATGTG	APOA2
sg_01549	TCTGGAAGTACTGAGAAACC	APOA2
sg_01550	CCCACCTTCAAGGCTGCAGA	APOA2
sg_01551	AGTCAAGATTGACCAGACCG	APOA4
sg_01552	GGCCAAGATCGACCAGAACG	APOA4
sg_01553	CAGGCGTTCATGCAGCTCGG	APOA4
sg_01554	TGAGGTGAGCCAGAAGATCG	APOA4
sg_01555	GCTGAGCAACAATGCCAAGG	APOA4
sg_01556	GCAACTGAAGCCCTACACGA	APOA5
sg_01557	CCAGGCTCTCGGCGTATGGG	APOA5
sg_01558	GCACCTGCACGCAGCGACTG	APOA5
sg_01559	GCTGCAGGAGCAGTTGCGCG	APOA5
sg_01560	GGAACTTGTTCATATTGTTG	APOA5
sg_01561	AAGTCCATGAGTTAATCGAG	APOB
sg_01562	CCAGTCCTGTCAGTACACAC	APOB
sg_01563	CTCCTACTATCCGCTGACCG	APOB
sg_01564	GGGACTTGGAACTCTCGAGA	APOB
sg_01565	AGGCTGATTACGAGTCATTG	APOB
sg_01566	GACCCCAACTAAGCAACCCG	APOBR
sg_01567	ATGACAGAAGACATGAAGTG	APOBR
sg_01568	TGAACTATCAGAAGTCCCAG	APOBR
sg_01569	GTGAAAGCACTAGGGCATGG	APOBR
sg_01570	CCAGAGGGGCGGAGTCAGAG	APOBR
sg_01571	AAACTCCTTCAGCTTATCCA	APOC1
sg_01572	TGGAAACACACTGGAGGACA	APOC1
sg_01573	GTTCTGTCGATCGTCTTGGA	APOC1
sg_01574	ACAGAACCACCACCAGGACC	APOC1
sg_01575	CAGGCCCAGCCCCAGCCCAG	APOC1
sg_01576	GGAGAGAGATTCCTTCACCT	APOC2
sg_01577	ACTCACCAAATCCCAATACC	APOC2
sg_01578	GGAGGACAAGAAACAGAGCT	APOC2
sg_01579	CTAGGCATCTCATCTTGCTG	APOC2
sg_01580	GTTTCTCATCTACAGCGGGC	APOC2
sg_01581	GGATGCACTGAGCAGCGTGC	APOC3
sg_01582	GCTGCTCAGTGCATCCTTGG	APOC3
sg_01583	TTTAGGGGCTGGGTGACCGA	APOC3
sg_01584	CTGCATGAAGCTGAGAAGGG	APOC3
sg_01585	GCGCCAGGAGGGCAACAACA	APOC3
sg_01586	AGCACGCAGAGGCACAGGGC	APOC4
sg_01587	GTGGTGAACAGGACCAGAGA	APOC4
sg_01588	GAGTCGCTGGAGCCTGGTGA	APOC4
sg_01589	AGTAGGTCTGCATGAAGCCC	APOC4
sg_01590	GGGTGGCAATGGTTCTGGTG	APOC4
sg_01591	GCGGACATGGAGGACGTGTG	APOE
sg_01592	GCTGATGGACGAGACCATGA	APOE
sg_01593	GGCCAAGGTGGAGCAAGCGG	APOE
sg_01594	ACCTGCGCAAGCTGCGTAAG	APOE
sg_01595	ACAGTGTCTGCACCCAGCGC	APOE
sg_01596	GTGTAGCATTCACACCACCC	APOF
sg_01597	CATAATACAAAGCTGTGCCC	APOF
sg_01598	GCCAGGCTTACCAAGAACTT	APOF
sg_01599	CATATGAAGTGGCATCCACA	APOF
sg_01600	GCAGAAATTGGCAGGACAAG	APOF
sg_01601	ACACGAAGTGTTGCAAACGT	APOH
sg_01602	TTCCCATCAAGACCAGACAA	APOH
sg_01603	AAGCCGGGCTATGTGTCCCG	APOH
sg_01604	TAAATCATCTGGCTTGGGAC	APOH
sg_01605	TCCAGCAAAAGGACATACTC	APOH
sg_01606	TGCCAGACCCATGCCGACGA	APOL1
sg_01607	CGGGATTACCAGCAGTACCA	APOL1
sg_01608	GGGGTTCAGAAGGTCCACAA	APOL1
sg_01609	TGAGGCCTGGAACGGATTCG	APOL1
sg_01610	AAGCCTTGACAAATTGAAGG	APOL1
sg_01611	AGGTGGTAGATCCATTTCCG	APOM
sg_01612	ACATGCGGATGGTAGCACGA	APOM
sg_01613	GTTGACTGTGCTCAGGGCAC	APOM
sg_01614	CAGATCTCAGAACTGAAGGT	APOM
sg_01615	GCCAGTGGTACTTTATCGCA	APOM
sg_01616	GAACAGTTGTACCTGACACC	APOO
sg_01617	TGAGGGTCAATCGAAGTATG	APOO
sg_01618	ACCTCCCAAAAATTCCGTGA	APOO
sg_01619	GAAGGTGAGCAAGCTCAGGC	APOO
sg_01620	AGTCTCGGAAAAAATCCAGG	APOO
sg_01621	GCGTGCTCATCCGAAAGCGG	APRT
sg_01622	TCTTACCTTCCCGTACTCCA	APRT
sg_01623	GGCCGCATCGACTACATCGC	APRT
sg_01624	CAGGACGGGCGAGATGTCCC	APRT
sg_01625	GGAGATTCAGAAAGACGCCC	APRT
sg_01626	GCGTGCTGGCTACTACCGAC	AQP1
sg_01627	TACATCATCGCCCAGTGCGT	AQP1
sg_01628	GGTGTCCAAGGGCTACAGAG	AQP1
sg_01629	GCCACGCTGGCGCAGAGTGT	AQP1
sg_01630	TCAACCCGGCTGTCACACTG	AQP1
sg_01631	GAGGCGTCCAACGATGCACA	AQP10
sg_01632	ATCCTGGACAGACGGAACAA	AQP10
sg_01633	CCCTACAGAACTATACAGGT	AQP10
sg_01634	ATTGTTCAGGGACAGATAGG	AQP10
sg_01635	GTTACGATAGCCATCTACGT	AQP10
sg_01636	CCCAGTATCACGTCAGCGAG	AQP11
sg_01637	GTAGACGAGCGTCAGCGTCC	AQP11
sg_01638	GGAAGGTGGCTAGAAACTCC	AQP11
sg_01639	GGCACGTCCAGCAACCCGTG	AQP11
sg_01640	CCGAGTCGACTTGCTCAAAG	AQP11
sg_01641	CCCGCCTGGCCGCCTCACAG	AQP12A
sg_01642	ACTCCTGCAGGGACACAGTG	AQP12A
sg_01643	GCCTCCACAAGCGCCCCGTG	AQP12A
sg_01644	TGGCACGCTGTTGAAGCTGG	AQP12A
sg_01645	GGCCCTGCTGCCTGGAGATG	AQP12A
sg_01646	TGCCACCTTCACCCTCTGTG	AQP12B
sg_01647	GGCCCAGCAGAGGCGCGTCA	AQP12B
sg_01648	GGTGGGCGCGGTGCAGCTCG	AQP12B
sg_01649	GAACTCCTGCAGGGACACGG	AQP12B
sg_01650	CAGATGGAAACAAAAGGCGC	AQP12B
sg_01651	GGCAGGCCACAGTCACGGCA	AQP2
sg_01652	GTGGCCCAGAGCCTGTACCA	AQP2
sg_01653	CACGCCAGCAGACATCCGCG	AQP2
sg_01654	CTGGGCAGCCACGTAGAAGG	AQP2
sg_01655	CGAGGCCAAAGAAGACGAAG	AQP2
sg_01656	CAGCACACACACGATAAGGG	AQP3
sg_01657	TACAACAACCCCGTCCCCCG	AQP3
sg_01658	GTAGATGGGCAGCTTGATCC	AQP3
sg_01659	GATGGTGAGGAAACCACCGT	AQP3
sg_01660	GGTCACGGCAGGGTTCAGGT	AQP3
sg_01661	AACCAGGAGACCATGACCAG	AQP4
sg_01662	CAGTGCTTTGGCCATATCAG	AQP4
sg_01663	GAGATGAGAACCATGTCGAC	AQP4
sg_01664	TGGGAGGTGTGACCAGATAG	AQP4
sg_01665	TCCAAACGGACTGATGTCAC	AQP4
sg_01666	CAGGGTGACAGACAGGCCAA	AQP5
sg_01667	GGTGCGGCGGGAGTCAGTGG	AQP5
sg_01668	GGCTGGCATCCTCTACGGTG	AQP5
sg_01669	CAGAATCAGCTCCACCACCA	AQP5
sg_01670	GCCCTGGGACCCGTGAGCGG	AQP5
sg_01671	GCCACATAGGCCACAGCACG	AQP6
sg_01672	AAAGAACACATACAGCCCCG	AQP6
sg_01673	AGAGACCCTTGGGATCAACG	AQP6
sg_01674	AGGAAGGCCAGCGTCACGGC	AQP6
sg_01675	ATGGCAATCTGTAGCACGGA	AQP6
sg_01676	TCAGCTGTCCACCCGAAAAG	AQP7
sg_01677	ATCCCGGTCAGCCACGCCTG	AQP7
sg_01678	GCCCAGCGCACAGTTAGCAA	AQP7
sg_01679	GTGTCCCTTGGCATGAACAC	AQP7
sg_01680	AGATCCAGGAAATACTGCAG	AQP7
sg_01681	GCTGTGAGACCCAGTACGGG	AQP8
sg_01682	GGCTCGTGATTGCCACGCTG	AQP8
sg_01683	GAGGTTCTGGAATGCATCTG	AQP8
sg_01684	CCCAGCAGTTCGACCAGACA	AQP8
sg_01685	AAGGCCAGGGAGCCGAGCGT	AQP8
sg_01686	GCCCAAGCTATTCTCAGTCG	AQP9
sg_01687	GATTATGAGGAGTATCATGG	AQP9
sg_01688	GGTGGAAAACTGCTGATCGT	AQP9
sg_01689	GACGGTTGCAGCCCCCACAA	AQP9
sg_01690	CGTGCCCAAGAACTCAGAGA	AQP9
sg_01691	AGATATACAGGGAGTCACCC	ARG1
sg_01692	GAAGTGGACAGACTAGGAAT	ARG1
sg_01693	ACTCCACTGACAACCACAAG	ARG1
sg_01694	GAATAAGCTTACTGTTCCCC	ARG1
sg_01695	AGATGACTCCAAGATCAGGG	ARG1
sg_01696	TAGGAGCCCCGTTCTCACAA	ARG2
sg_01697	TCATAGGTACCACAACTCCC	ARG2
sg_01698	TGATCGACTTGGTATCCAGA	ARG2
sg_01699	TTGGCAAGACCCACTGAGCG	ARG2
sg_01700	CATCAACCCAGACAACACAA	ARG2
sg_01701	CAAGCTAACCATCTTACGCA	ARNT
sg_01702	AGATGTCTAACGATAAGGAG	ARNT
sg_01703	GGAACTCTAGCCAAGAACCA	ARNT
sg_01704	GATACCCTCAATGTTGTGTC	ARNT
sg_01705	TGGGGAACCTCACTTCGTGG	ARNT
sg_01706	TGTGATTGGCTACCAACCCC	ARNT2
sg_01707	AGGAGAAGCCCAATATGCTG	ARNT2
sg_01708	GCAGTGTACGTACTTGACGT	ARNT2
sg_01709	GGATGTGCATGGGCTCGCGG	ARNT2
sg_01710	GCTGCATGTGGGGACCATGT	ARNT2
sg_01711	GAGACCATGCGTATGTCCCG	ARSA
sg_01712	GTTCGGATGGGCATGTACCC	ARSA
sg_01713	ACGGGATGCCTAGAAATCGA	ARSA
sg_01714	GCCAAGATCACTTACGTGAG	ARSA
sg_01715	ATGTAGCGGGCCTCTAGTCC	ARSA
sg_01716	GACCTAGGCTGGAACGACGT	ARSB
sg_01717	ACTGTGTTTCAGATAACGGA	ARSB
sg_01718	GTAGGTATCAAATCCTCGGC	ARSB
sg_01719	TATCTCTGTAAGATCCGTAC	ARSB
sg_01720	AGAGCAAGGTAGAGAAACAG	ARSB
sg_01721	TGTGAATTGTGCATCCCGCG	ARSD
sg_01722	TGGCTTATATGGTGATAATG	ARSD
sg_01723	CCAGCGTCGCACAAACCCGA	ARSD
sg_01724	TCGGCTTGGGGTGCAGAGCG	ARSD
sg_01725	ATGGCGGATGATCTAGGCAC	ARSD
sg_01726	AGAGACTGACCTGATCGCAC	ARSE
sg_01727	GATGAGAAACCACACCATCA	ARSE
sg_01728	GCTGTATGGGGACAACGTAG	ARSE
sg_01729	GCTATGGCAACAACACCATG	ARSE
sg_01730	GCTTCCCTGCTACCAGTGTG	ARSE
sg_01731	GTATCTTCCCGTCAAGAACG	ARSF
sg_01732	ACTTTACATCAGATCACGGA	ARSF
sg_01733	GCCAGTGAAATCGTCCGTGG	ARSF
sg_01734	ACCCATAATTATATGGATGG	ARSF
sg_01735	TGGGACTGCCTCCTCATGCG	ARSF
sg_01736	TCCGCTCAACGAGACCACCT	ARSG
sg_01737	AGGTAAGGGCACGTGCATGT	ARSG
sg_01738	TCCAGCCAAGCAGACGACCT	ARSG
sg_01739	TATCAGTACAGCCCATATCA	ARSG
sg_01740	TCTAGGAGACAATGGCCCGT	ARSG
sg_01741	GTAACAGTGATCATTCCGAG	ARSH
sg_01742	GCTACGGTAATAACTCAGTG	ARSH
sg_01743	GTTATGGATTTACTCGACGT	ARSH
sg_01744	AAGGAGGTATCCGTGTGCCA	ARSH
sg_01745	GCTGGCTCAGGATCAAACTG	ARSH
sg_01746	GACCAAGGCTACCACGACGT	ARSI
sg_01747	GCGGTACAGGTACTCACGAG	ARSI
sg_01748	GAGTGTCTGCCCACCCGTCG	ARSI
sg_01749	ACCAGGTACCAGATCCACAC	ARSI
sg_01750	TGGCCGCTCCGAGGACGCAA	ARSI
sg_01751	GCAGCGAGCTTGTCAAGAGT	ARSJ
sg_01752	ACTTATGGTTACCTGTCCTG	ARSJ
sg_01753	TTCATCTAAGCAGGAAAGCA	ARSJ
sg_01754	TCAGCCAGTGAAATGAGAGT	ARSJ
sg_01755	CCAGAGGTAAACAGTTGGGT	ARSJ
sg_01756	GTTACGGATAAGATTAACCA	ARSK
sg_01757	GTCATATACTCCTCAGACCA	ARSK
sg_01758	TAGATCCAAATTATACAACA	ARSK
sg_01759	GGAAGGTTAACATTTCATCC	ARSK
sg_01760	TCTTATACAAAAAACTGCAC	ARSK
sg_01761	AAAGTATCTTGACTATCACA	AS3MT
sg_01762	AGATTGGCAGTGACCAAACG	AS3MT
sg_01763	GGTGAAAAAGGACACGTGAC	AS3MT
sg_01764	TACACGAAGAAGTAGCCCTA	AS3MT
sg_01765	AGACCTACACAACAATATCA	AS3MT
sg_01766	TAAAGGTATATCAGTAACAG	ASAH1
sg_01767	GAACGTTTCAGTATAAATGG	ASAH1
sg_01768	AAATAGGTCATCTAATACAT	ASAH1
sg_01769	TCAAGATTTATGGTGTACCA	ASAH1
sg_01770	TAAGCATCATAGCATACCAC	ASAH1
sg_01771	ACATAGGCATGGTATCACAA	ASAH2
sg_01772	GGACCACGTTGCATCAACAC	ASAH2
sg_01773	AGTGGCTACCATATTGGTGT	ASAH2
sg_01774	CCAGGAGGTAACAGGACCAC	ASAH2
sg_01775	GTTCATGCTGACCGGGTGGA	ASAH2
sg_01776	AGCAAAACCTGAATACAGAG	ASAH2B
sg_01777	ATTGTGGATAGAGCACCAAA	ASAH2B
sg_01778	AGTGTGTAATGATGCCTCCT	ASAH2B
sg_01779	CCTCACTGTGGAGAAATATG	ASAH2B
sg_01780	AATTCAGTACAAAACCAGGT	ASAH2B
sg_01781	ACCTCGGTGGACTAAAGTGG	ASH1L
sg_01782	ATAAACACAAATGTAAGCGC	ASH1L
sg_01783	GACAGAGCATTACTTAATGG	ASH1L
sg_01784	GGAGAAGTGCAATATACAGG	ASH1L
sg_01785	GCAGGCCTAAGAGGCAAATG	ASH1L
sg_01786	CCATGTCACCAAGCTCGACG	ASIC1
sg_01787	TGTCTGGTATCTCATACCTG	ASIC1
sg_01788	AAGTGCTACACGTTCAACTC	ASIC1
sg_01789	CCCAGCTGGTCGATGAAAGG	ASIC1
sg_01790	GACCTGGCATGTGCACCATG	ASIC1
sg_01791	CGGCGCTGATTCCCTCGAAG	ASIC2
sg_01792	GATCGGCACTCACCCCACGG	ASIC2
sg_01793	TCAGCTTCCCGTCACACACG	ASIC2
sg_01794	ACCTCTACTATGCCGGCCAC	ASIC2
sg_01795	GCAGCCCGTGCAGTTTAGCG	ASIC2
sg_01796	GCACACTGGCACGTCGCCTG	ASIC3
sg_01797	TCGGATCCCCACCTCAAACG	ASIC3
sg_01798	TGAGAGGGTGCGCTACTACA	ASIC3
sg_01799	GCTGAACTGCAATCGCCCCA	ASIC3
sg_01800	GAGCTGCTCACCACTACTAG	ASIC3
sg_01801	GAAGTGTTACACCTTCAACG	ASIC4
sg_01802	ACTCGATGTAGATATTTGGT	ASIC4
sg_01803	TCTGCGCGGCAGTTGCCCCA	ASIC4
sg_01804	AGGAGTACCTGCCCATCTGG	ASIC4
sg_01805	ACACCCCGAACCCCAGCTGG	ASIC4
sg_01806	AAGCCTAACCCATCAAACTG	ASIC5
sg_01807	GTTCATCAAGAATACCCTTG	ASIC5
sg_01808	CAATTCCACTGGCTCTAGAG	ASIC5
sg_01809	AAAGTGAGTGTCTCTGGAAG	ASIC5
sg_01810	GAACCGGAGCAAAATTCGCA	ASIC5
sg_01811	GGGACGGAGCCGGAATGACC	ASL
sg_01812	GATACTCCATGGCCTAGACA	ASL
sg_01813	CTACGACCGGCACCTTTGGG	ASL
sg_01814	CGCCTCTGCCCGATCCACCA	ASL
sg_01815	CACAAAGTCCCGCTCACTAG	ASL
sg_01816	AAACGGTGATCTTACATCCA	ASMT
sg_01817	TTGTGACGTCGGGCTGACCG	ASMT
sg_01818	TGGGAACACTGACAGGTCAA	ASMT
sg_01819	GCAGGCGGCGAAGAGAACCT	ASMT
sg_01820	TAGCCGCTCGCCCTCGGACC	ASMT
sg_01821	CTGGGAATACGTCCACAGCG	ASMTL
sg_01822	TACTCCGTATGGGTACGCCA	ASMTL
sg_01823	AGGAGGCGTGTCGGGAACGG	ASMTL
sg_01824	GATGGCGAATACTCTCTGCA	ASMTL
sg_01825	CATTGGAGCGGACACGATCG	ASMTL
sg_01826	CTGAAGTGGATCTTCGTCGG	ASNA1
sg_01827	TGAGGCCATGAGCTATGCCG	ASNA1
sg_01828	CAGGCCCCGCTCCACGATGG	ASNA1
sg_01829	TTGCTAAGTGTAGGCTCCAG	ASNA1
sg_01830	GTTGTCATAGCCTTTGACCT	ASNA1
sg_01831	CTCCATATGTATCTCTACCC	ASNS
sg_01832	TTGTCATAGAGGGCGTGCAG	ASNS
sg_01833	TTCTAGCAGCCAGTAAATCG	ASNS
sg_01834	AACGTTTGATGACAGACAGA	ASNS
sg_01835	GTGAAATCCAAAGCAGCAGT	ASNS
sg_01836	CATCTGGATTGGCAAATCAG	ASNSD1
sg_01837	AGTGTACCAGATCGAATCAC	ASNSD1
sg_01838	GTTTCTTGACTGCTACACTC	ASNSD1
sg_01839	TGATAATATATAAATGACCA	ASNSD1
sg_01840	AGGAATATGACGGTCAGCAA	ASNSD1
sg_01841	AGTGCACCCCATGTTAGAGG	ASPA
sg_01842	GAGGACCAACTTCTATACCT	ASPA
sg_01843	ACAACACCACCTCTAACATG	ASPA
sg_01844	GAGTATTTCTGGTTAAGCAT	ASPA
sg_01845	TACACTTCTTCACTGCTCTG	ASPA
sg_01846	CCAGAGCCTTCGTGTCACCA	ASPDH
sg_01847	TCTACGAAGGCCCTGTCCGT	ASPDH
sg_01848	TTTGTCTGGAATCGTGACCC	ASPDH
sg_01849	TGGTCAGGGACTCACCGAGG	ASPDH
sg_01850	TCTGGTCACTTAGAGCTGAG	ASPDH
sg_01851	AAGGCAAACCCACTCAGCGA	ASPG
sg_01852	GGGCAACCAAGGTAGACGCT	ASPG
sg_01853	AGGCTTCGACATGACATCGG	ASPG
sg_01854	GGGTACAGTTGACGATGACC	ASPG
sg_01855	GGACAGCATCGAGGCAGCAA	ASPG
sg_01856	AACCGAGCATAGTTACCACG	ASPH
sg_01857	ACCTACTCAGGTCATATGAG	ASPH
sg_01858	TCCACGAGCAAGATATGGGA	ASPH
sg_01859	GAAATGGTACACGCAGAACA	ASPH
sg_01860	TCTACAGGATTATCCTCAGG	ASPH
sg_01861	CGGAAGGCCTAGTGAGCCGG	ASPHD1
sg_01862	GGCGTCCCGCGGCACAAAGG	ASPHD1
sg_01863	CCAAGACATGCAGGCCCTAG	ASPHD1
sg_01864	GGGACTACCCCTCCGCCTCG	ASPHD1
sg_01865	TGGCCACGGGAGCATGATCA	ASPHD1
sg_01866	GTGTGGTACTGTTATCACGT	ASPHD2
sg_01867	GTGCGCTGCACCCACAACGA	ASPHD2
sg_01868	GGACGCACAGAAACATGATG	ASPHD2
sg_01869	GGTGAACCACTCCCCGCTGG	ASPHD2
sg_01870	GCCACTCGAGCGACATCTTG	ASPHD2
sg_01871	GACGATCCCGAGTTCAACGC	ASRGL1
sg_01872	GACACGGTGAGTCCCCAACG	ASRGL1
sg_01873	TAATGGGATTTGCTATACAC	ASRGL1
sg_01874	ATGGTCAGAGCCGCCACCGT	ASRGL1
sg_01875	TGGCAGAAACTTGGGAACCG	ASRGL1
sg_01876	TGACCTGATGGAGTACGCAA	ASS1
sg_01877	ACGGCGCCACAGGAAAGGTG	ASS1
sg_01878	ACACCTCGTGCATCCTCGTG	ASS1
sg_01879	CACAGGGGCAAGCATGGCGT	ASS1
sg_01880	CTTTCCCCTCCGCAGCTACG	ASS1
sg_01881	ACACCACTGTCACTCGAGCG	ATIC
sg_01882	TGAATCTGGTCGCTTCCGGA	ATIC
sg_01883	AGTTGGTACATCACAAACAT	ATIC
sg_01884	TACAAAGGGATAGAGATTGC	ATIC
sg_01885	GGGCTGCAGTGTGTACAGCT	ATIC
sg_01886	CGATGTGGCATAGCCCGTCG	ATP10A
sg_01887	ACTGCACGTAGCATAGGCAC	ATP10A
sg_01888	GTGTGACAAGAGCCTAGCCG	ATP10A
sg_01889	AAGCACGCAGTTGTAGGCTC	ATP10A
sg_01890	TTACTACAGGACATGGACTG	ATP10A
sg_01891	CGAGATTGTTGTCTACACCA	ATP10B
sg_01892	AAGCTCATCTCGGTTGTCGA	ATP10B
sg_01893	CAGCTCCAATAAGGCACATG	ATP10B
sg_01894	CCAGATGGCATATCCCATTG	ATP10B
sg_01895	TGCCCATGATGGTGCAACGT	ATP10B
sg_01896	TTCCTGTCTTATCGGAAAAG	ATP10D
sg_01897	GGCTCTCGGCCTCATAACAC	ATP10D
sg_01898	CATTCCAACAAAGAACGCGT	ATP10D
sg_01899	AGTTCTCCATCGCTTAACAG	ATP10D
sg_01900	AATTTAGTCAGATTACACCT	ATP10D
sg_01901	CAGAGTGGAGCGTAACGCAG	ATP11A
sg_01902	TCTGCACATACCTTTCGATG	ATP11A
sg_01903	AGGTCCGACGTGTTCACCAG	ATP11A
sg_01904	GAATGCAGAGATACACAATG	ATP11A
sg_01905	GAAAGGAAGATCAAGTCGCA	ATP11A
sg_01906	ACAGGTGTTGCGGTATACAC	ATP11B
sg_01907	GCATAGTACTCCAACTGCGA	ATP11B
sg_01908	GAGCCACAGCAGTAGAAGAC	ATP11B
sg_01909	GCGAGTGTGCTGAACAATTG	ATP11B
sg_01910	ATTCTCCCTAAATGTATAGG	ATP11B
sg_01911	AAGGTCTGATGTGTTAACCA	ATP11C
sg_01912	CAATTACACTCATACGTCGC	ATP11C
sg_01913	AAGGCGGCAGGCATAGCATG	ATP11C
sg_01914	CCAACTAGCCCAGTTACCAG	ATP11C
sg_01915	GATAGAAGAATAAGATCACA	ATP11C
sg_01916	GGATAACTCATCTCTCACGG	ATP12A
sg_01917	CATCTGGCACGGTGGACCGA	ATP12A
sg_01918	ACATCGCCTCAACATTGCTG	ATP12A
sg_01919	GGGGTCATCCATCTCGTGGA	ATP12A
sg_01920	CAGGGATGCAGACTTGTCGC	ATP12A
sg_01921	TCACGGCCGCGATGTAGCAG	ATP13A1
sg_01922	GAGCACCGTCCCATACCCGG	ATP13A1
sg_01923	TCATACTATCAGAGCAACAG	ATP13A1
sg_01924	GCACCCGCTGTCAACCGCTG	ATP13A1
sg_01925	CCAGTGATGAGATCGTACCA	ATP13A1
sg_01926	ACTGTGCAGAGACACACCGG	ATP13A2
sg_01927	AGGCAGCCCAGCAACTGACG	ATP13A2
sg_01928	TCTACGCCCAGAGCCGACTG	ATP13A2
sg_01929	GGTGGACGTCGTCACAAGAG	ATP13A2
sg_01930	GATAACGAGTGTTTCGGCGT	ATP13A2
sg_01931	GACCATGACGGTGCGAATGT	ATP13A3
sg_01932	TGGGTGAAATAACGAATCTG	ATP13A3
sg_01933	AAGACATAGTAGAAACAAGT	ATP13A3
sg_01934	CTACATGAAAGGAGCGCCCG	ATP13A3
sg_01935	AATGTTTGAGGCTATTGGAT	ATP13A3
sg_01936	AGTATAGATCATCCCAATGG	ATP13A4
sg_01937	AGAGTGAAGCGGATTACAAG	ATP13A4
sg_01938	ATCACGCTACTACCTTGACG	ATP13A4
sg_01939	TATGTGACTCGACGAGATGG	ATP13A4
sg_01940	CACATACGTTGATCCTCTGG	ATP13A4
sg_01941	TGAGATCCATCCTGTACCCC	ATP13A5
sg_01942	TCCCGCAGAAGATTAGTGTG	ATP13A5
sg_01943	GCTTACAGGAAACTTCAGTG	ATP13A5
sg_01944	AGTGCCCAAGAATTTCCCAC	ATP13A5
sg_01945	AGTTAAGCTGCATAACCTCG	ATP13A5
sg_01946	GACACTTACTGCCAAACGCA	ATP1A1
sg_01947	GTAGACAACAATACCACGTG	ATP1A1
sg_01948	GAAAATGAGCATAAATGCGG	ATP1A1
sg_01949	ATCCATTCAGGAGTAGTGGG	ATP1A1
sg_01950	AGCATACCTTAAGAATAGGT	ATP1A1
sg_01951	CAGAGAAGCCAAGGCATGCG	ATP1A2
sg_01952	CTGAGGCGAGAGTAGCTATG	ATP1A2
sg_01953	CCGGTCCAGAATGCGCTCTG	ATP1A2
sg_01954	GTGTGGGCTCACATTGTCGT	ATP1A2
sg_01955	CATGAGAAGAGATGATCCGG	ATP1A2
sg_01956	ACCGCCTACCACCCCAGAGT	ATP1A3
sg_01957	GTCCATGATCGACCCACCCC	ATP1A3
sg_01958	GAGCCCAGCGATGTGAGACA	ATP1A3
sg_01959	CATGACAGTGCGGTCGCCCG	ATP1A3
sg_01960	CTCACCTTCCCGGATCACCA	ATP1A3
sg_01961	GAGCATCGTACTGTCCGTCG	ATP1A4
sg_01962	GCTGAGCACCAAGTACTCCG	ATP1A4
sg_01963	CCGTAGCAATCACAATACCC	ATP1A4
sg_01964	TGGGCCTGACACCTTAGCAA	ATP1A4
sg_01965	AGATCATCCCATTACAGCTA	ATP1A4
sg_01966	TCCAAGGACTCATTCTTGGG	ATP1B1
sg_01967	CCCAGTGAACCGAAAGAACG	ATP1B1
sg_01968	GGCCACTCGGTCCTGATATG	ATP1B1
sg_01969	TGGGCAGGACCGGTGGCAGT	ATP1B1
sg_01970	TAATGATCCCAAGAGCTATG	ATP1B1
sg_01971	TGAGGAACCCATAAAAAACG	ATP1B2
sg_01972	GTTCGTAATAGCGTCCAGGG	ATP1B2
sg_01973	AGGAGTTCGTGTGGAACCCG	ATP1B2
sg_01974	AGTGCTGTAACCATAGTGGG	ATP1B2
sg_01975	CAGGACCGACTGGCCACACC	ATP1B2
sg_01976	CGTGACCAGATTCCTAGCCC	ATP1B3
sg_01977	ACTGAATGTATATTCCAATG	ATP1B3
sg_01978	CCAGGAACCCATAAAAAACT	ATP1B3
sg_01979	GCGCCCCAGGAATTCTCCGG	ATP1B3
sg_01980	TCATTACTTCAAGCATGCAG	ATP1B3
sg_01981	AAGGGTCTGATCATAACTCC	ATP1B4
sg_01982	TCTTGGATGAAGTACTGCCC	ATP1B4
sg_01983	GACGGTGGTGCCCAAATCGG	ATP1B4
sg_01984	GATCATGAGTGAATACCTGT	ATP1B4
sg_01985	AAATAGTGTGTACATGCAGA	ATP1B4
sg_01986	TGTGCGAGTTGGCACCACCC	ATP2A1
sg_01987	TTCAACGACCCCGTCCATGG	ATP2A1
sg_01988	GACAGATACAGACTCGCCTG	ATP2A1
sg_01989	ACCAGCCCGTCATACTGCCC	ATP2A1
sg_01990	CTTGTCGGAACAGATGACAG	ATP2A1
sg_01991	GCTGGATCCTCCGAGAATCG	ATP2A2
sg_01992	AATGGGCAAAGTGTATCGAC	ATP2A2
sg_01993	TAGTACTTCCAACTCGAATG	ATP2A2
sg_01994	GTTCAACTCGAGCAAAACAG	ATP2A2
sg_01995	AGATAACAGAAGTACAACCA	ATP2A2
sg_01996	ATGATCACGGGGGATAACAA	ATP2A3
sg_01997	TCGGCTACCACGAACATCTG	ATP2A3
sg_01998	CCTGTGCAACGACTCGGCTC	ATP2A3
[truncated: 14,462 more rows]
