# Supplementary material
Source: Research Square preprint supplement (doi:10.21203/rs.3.rs-9593389/v1)
Supplement: Supplementary file 3 [file 434cccf93a45cf092ed5cd53.xlsx]

## Sheet: rra_EnzaR.gene_summary
Supplementary Table S2. MAGeCK gene-level summary of the in vivo CRISPR-Cas9 metabolic screen.
Gene Symbol	Total sgRNAs	Negative RRA Score	Negative P-value	Negative FDR	Negative Rank	Negative Effective sgRNAs	Negative Log2FC	Positive RRA Score	Positive P-value	Positive FDR	Positive Rank	Positive Effective sgRNAs	Positive Log2FC
RPE	5	4.8497e-07	1.2987e-06	0.00495	1	5	-2.0477	0.95151	0.95671	1	3004	0	-2.0477
NAA50	5	3.4047e-05	9.9997e-05	0.190594	2	5	-1.461	0.99458	0.99596	1	3147	0	-1.461
PGK1	5	6.3255e-05	0.00017792	0.226073	3	4	-0.90245	0.98423	0.98731	1	3115	0	-0.90245
OGDH	5	0.00015188	0.00043505	0.249646	4	2	0.16215	0.19208	0.40926	1	1164	2	0.16215
GRIK1	5	0.00019604	0.00045583	0.249646	5	5	-1.1258	0.9998	0.99979	1	3162	0	-1.1258
PAFAH1B1	5	0.00021128	0.00045843	0.249646	6	3	-3.2892	0.50731	0.68587	1	2052	2	-3.2892
SLC22A6	5	0.00021726	0.00045843	0.249646	7	5	-0.63088	0.99978	0.99978	1	3161	0	-0.63088
DPEP1	5	0.00034808	0.00093114	0.39549	8	3	-0.66897	0.4604	0.62906	1	1904	1	-0.66897
ABCC9	5	0.00035564	0.00093374	0.39549	9	4	-0.77982	0.17403	0.36597	1	1086	1	-0.77982
SCAP	5	0.00046084	0.0013181	0.502475	10	2	0.16253	0.65488	0.75276	1	2290	1	0.16253
UQCR10	5	0.00058939	0.0017727	0.528124	11	5	-0.48948	0.99941	0.99949	1	3160	0	-0.48948
SLC12A4	5	0.00066861	0.0022298	0.528124	12	5	-0.53171	0.99933	0.99944	1	3159	0	-0.53171
ERO1LB	5	0.00075506	0.0024142	0.528124	13	4	-0.88908	0.92632	0.93768	1	2921	0	-0.88908
CDS2	5	0.00075923	0.0024142	0.528124	14	2	0.24185	0.096763	0.23301	1	672	3	0.24185
AQP8	5	0.00079115	0.0028739	0.528124	15	4	-1.1018	0.69337	0.76856	1	2356	1	-1.1018
MSR1	5	0.00086472	0.0033129	0.528124	16	2	0.061777	0.41558	0.59787	1	1785	2	0.061777
ASNA1	5	0.00090528	0.0034402	0.528124	17	3	-0.53811	0.45984	0.62906	1	1902	2	-0.53811
GSTA2	5	0.00091605	0.0034402	0.528124	18	4	-0.60917	0.087167	0.22309	1	616	1	-0.60917
RPEL1	5	0.0010628	0.0036557	0.528124	19	4	-0.85884	0.98805	0.99115	1	3128	0	-0.85884
LIPI	5	0.0011008	0.0036739	0.528124	20	5	-0.48923	0.9989	0.99901	1	3158	0	-0.48923
PGK2	5	0.0011931	0.0038791	0.528124	21	4	-0.53095	0.50294	0.67803	1	2037	1	-0.53095
PGAM1	5	0.0012684	0.0041155	0.528124	22	3	-0.40707	0.73176	0.78305	1	2425	1	-0.40707
ALDOA	5	0.0013049	0.0042064	0.528124	23	4	-0.66722	0.41162	0.59099	1	1769	1	-0.66722
INPPL1	5	0.0013584	0.0043726	0.528124	24	5	-0.65636	0.99864	0.99864	1	3157	0	-0.65636
DOLK	5	0.0013663	0.0043726	0.528124	25	2	-0.25394	0.86165	0.87761	1	2712	1	-0.25394
GPD1	5	0.0015456	0.0050869	0.528124	26	3	-0.74158	0.057996	0.15731	1	470	2	-0.74158
P4HA3	5	0.0015805	0.0050895	0.528124	27	3	-0.65725	0.91598	0.93006	1	2886	0	-0.65725
CDIPT	5	0.0016697	0.0052115	0.528124	28	4	-0.61457	0.43816	0.61234	1	1836	1	-0.61457
TFAM	5	0.0018301	0.0054557	0.528124	29	5	-0.44132	0.99817	0.99838	1	3156	0	-0.44132
NAMPT	5	0.0018563	0.0054842	0.528124	30	5	-0.53332	0.99269	0.99547	1	3137	0	-0.53332
ZADH2	5	0.001973	0.0055622	0.528124	31	2	-0.15032	0.3078	0.50595	1	1494	1	-0.15032
DPYSL2	5	0.0021247	0.0060894	0.528124	32	3	-0.52891	0.86916	0.88176	1	2739	0	-0.52891
SLC5A9	5	0.0021595	0.0060894	0.528124	33	5	-0.44749	0.99784	0.99833	1	3155	0	-0.44749
PI4KA	5	0.0022763	0.0067465	0.528124	34	3	-0.21905	0.48013	0.65104	1	1965	1	-0.21905
ATP2A2	5	0.0023251	0.0067959	0.528124	35	3	-4.7402	0.38882	0.57507	1	1725	1	-4.7402
SLC35B1	5	0.002445	0.0073673	0.528124	36	2	-0.12045	0.15356	0.32234	1	980	2	-0.12045
HMGCS1	5	0.0024493	0.0073673	0.528124	37	5	-0.52777	0.99755	0.99806	1	3154	0	-0.52777
ACACA	5	0.0025795	0.0074426	0.528124	38	2	-0.10353	0.80528	0.827	1	2560	1	-0.10353
INPP4A	5	0.0027402	0.0082452	0.528124	39	4	-0.72576	0.82343	0.83267	1	2610	1	-0.72576
CD36	5	0.002866	0.0083595	0.528124	40	3	-0.49964	0.0037916	0.016858	1	48	1	-0.49964
PI4K2A	5	0.0028663	0.0083595	0.528124	41	5	-0.61075	0.99713	0.99792	1	3153	0	-0.61075
ALAS1	5	0.0029259	0.0084816	0.528124	42	2	0.071885	0.44407	0.61837	1	1852	2	0.071885
NAA30	5	0.0029532	0.0085465	0.528124	43	4	-0.55441	0.78011	0.81265	1	2506	1	-0.55441
SLC6A14	5	0.0029593	0.0085465	0.528124	44	4	-0.60631	0.92718	0.93848	1	2923	0	-0.60631
POMT2	5	0.0029864	0.0086971	0.528124	45	4	-0.29638	0.79429	0.81698	1	2539	1	-0.29638
INMT	5	0.0030751	0.0089932	0.528124	46	4	-0.64684	0.1826	0.38162	1	1127	1	-0.64684
GSTA3	5	0.0031311	0.0092426	0.528124	47	5	-0.34294	0.99687	0.9976	1	3152	0	-0.34294
ATP6V1F	5	0.0031857	0.0096893	0.528124	48	3	-0.66436	0.68381	0.76575	1	2339	1	-0.66436
CYB5RL	5	0.0032257	0.0096893	0.528124	49	5	-0.73042	0.99677	0.99747	1	3151	0	-0.73042
ATP6V1D	5	0.0032432	0.0096893	0.528124	50	4	-1.5263	0.9667	0.97322	1	3056	0	-1.5263
COX5A	5	0.0034161	0.010118	0.528124	51	4	-0.54178	0.64251	0.75135	1	2263	1	-0.54178
MYC	5	0.0034482	0.010263	0.528124	52	3	-0.18325	0.13282	0.29979	1	877	2	-0.18325
TXNRD1	5	0.0034887	0.010367	0.528124	53	2	0.20424	0.17375	0.36496	1	1083	3	0.20424
LIPH	5	0.0035123	0.01037	0.528124	54	4	-0.42745	0.96493	0.97112	1	3049	0	-0.42745
SLC19A3	5	0.0035513	0.010432	0.528124	55	4	-0.57301	0.98532	0.98823	1	3122	0	-0.57301
SMYD3	5	0.0036686	0.010536	0.528124	56	3	-0.44868	0.37746	0.56296	1	1692	2	-0.44868
SLC36A2	5	0.003759	0.010736	0.528124	57	3	-0.88636	0.12483	0.28989	1	828	2	-0.88636
RPIA	5	0.0038041	0.010806	0.528124	58	2	-0.20188	0.33642	0.52081	1	1573	2	-0.20188
DHFR2	5	0.0039753	0.011066	0.528124	59	5	-0.30575	0.99602	0.99664	1	3150	0	-0.30575
GXYLT1	5	0.0040116	0.011572	0.528124	60	3	-0.35511	0.17765	0.37509	1	1103	2	-0.35511
COX11	5	0.0040944	0.01164	0.528124	61	2	0.12746	0.43167	0.61095	1	1823	2	0.12746
PRDM16	5	0.0043971	0.011965	0.528124	62	3	-0.27249	0.86382	0.87901	1	2723	1	-0.27249
CKM	5	0.0044402	0.012045	0.528124	63	4	-0.7063	0.63075	0.75	1	2246	1	-0.7063
NQO2	5	0.0044424	0.012045	0.528124	64	2	-0.067027	0.66067	0.75415	1	2299	1	-0.067027
COX8A	5	0.0044446	0.012045	0.528124	65	3	-0.63895	0.88808	0.90246	1	2807	0	-0.63895
MAT2A	5	0.0045162	0.012048	0.528124	66	3	-0.50761	0.4877	0.65578	1	1990	2	-0.50761
TRPM7	5	0.0045902	0.012258	0.528124	67	5	-0.34485	0.99541	0.99626	1	3149	0	-0.34485
HS6ST3	5	0.0046998	0.01232	0.528124	68	1	0.4704	0.037317	0.11299	1	343	4	0.4704
DLST	5	0.0047185	0.01232	0.528124	69	5	-0.50366	0.99528	0.99619	1	3148	0	-0.50366
MDH1B	5	0.0049185	0.012526	0.528124	70	4	-0.60067	0.71869	0.7801	1	2402	1	-0.60067
IL1B	5	0.0049436	0.012526	0.528124	71	4	-0.57205	0.71448	0.77723	1	2396	1	-0.57205
UCKL1	5	0.0049974	0.012528	0.528124	72	2	-0.081478	0.28862	0.49106	1	1436	2	-0.081478
FUT7	5	0.0050024	0.012528	0.528124	73	2	0.089155	0.16654	0.35004	1	1045	2	0.089155
ENTPD6	4	0.0050676	0.0096114	0.528124	74	3	-0.60073	0.7583	0.76324	1	2466	1	-0.60073
CA13	5	0.0052297	0.012616	0.528124	75	4	-0.74789	0.98313	0.98661	1	3112	0	-0.74789
DHDDS	5	0.0052599	0.012619	0.528124	76	2	0.12432	0.30063	0.49827	1	1469	2	0.12432
ACE2	5	0.0053049	0.012746	0.528124	77	3	-0.16087	0.66322	0.75416	1	2307	1	-0.16087
UCP2	5	0.0053342	0.012746	0.528124	78	4	-0.47967	0.81658	0.83267	1	2593	1	-0.47967
DPAGT1	5	0.005407	0.012746	0.528124	79	4	-0.56231	0.10898	0.26186	1	751	1	-0.56231
SLC7A5	5	0.0054881	0.012749	0.528124	80	5	-0.36308	0.99451	0.99596	1	3146	0	-0.36308
MGAT4D	5	0.0055124	0.012749	0.528124	81	3	-0.51134	0.94254	0.94714	1	2976	0	-0.51134
CYP3A43	5	0.0056074	0.012855	0.528124	82	2	-0.18771	0.011585	0.039265	1	138	2	-0.18771
NDUFAB1	5	0.0056364	0.012985	0.528124	83	4	-0.62648	0.64504	0.75135	1	2270	1	-0.62648
PCYOX1L	5	0.0058317	0.013505	0.528124	84	5	-0.37654	0.99417	0.99596	1	3145	0	-0.37654
PGS1	5	0.0058598	0.013507	0.528124	85	4	-0.37841	0.86639	0.87902	1	2728	0	-0.37841
PIKFYVE	5	0.0059098	0.013601	0.528124	86	3	-0.30881	0.97058	0.97571	1	3069	0	-0.30881
HCN3	5	0.0059364	0.013726	0.528124	87	3	-0.6592	0.69829	0.76995	1	2367	1	-0.6592
APOL1	5	0.0059722	0.013726	0.528124	88	3	-0.20948	0.95813	0.96533	1	3022	0	-0.20948
GLYR1	5	0.0059768	0.013726	0.528124	89	5	-0.35849	0.99402	0.99586	1	3144	0	-0.35849
MVD	5	0.0060005	0.013728	0.528124	90	2	0.12122	0.19417	0.41202	1	1174	2	0.12122
SV2A	5	0.0060425	0.013728	0.528124	91	4	-0.46265	0.90036	0.91699	1	2845	0	-0.46265
GUCY1B1	5	0.0060856	0.013822	0.528124	92	3	-0.45594	0.34348	0.52967	1	1592	1	-0.45594
PDE1C	5	0.0060872	0.013822	0.528124	93	4	-0.56856	0.93987	0.94548	1	2963	0	-0.56856
VKORC1L1	5	0.0062759	0.014074	0.528124	94	5	-0.40087	0.99372	0.99585	1	3143	0	-0.40087
LDHAL6A	5	0.0064004	0.014141	0.528124	95	5	-0.73142	0.9936	0.99577	1	3142	0	-0.73142
KHK	5	0.0065864	0.014489	0.528124	96	4	-0.4077	0.90672	0.92224	1	2863	0	-0.4077
CARNS1	5	0.0067808	0.014567	0.528124	97	3	-0.56856	0.67178	0.7556	1	2322	1	-0.56856
SLC5A4	5	0.0068165	0.014567	0.528124	98	2	-0.26304	0.078379	0.20968	1	569	1	-0.26304
CEL	5	0.0068447	0.014567	0.528124	99	3	-0.61315	0.24955	0.45695	1	1334	2	-0.61315
ICMT	5	0.0069954	0.01485	0.528124	100	5	-0.58635	0.993	0.99556	1	3141	0	-0.58635
SLC6A2	5	0.0070594	0.015071	0.528124	101	3	-0.45317	0.24844	0.45695	1	1333	2	-0.45317
ATP5PO	5	0.007105	0.015071	0.528124	102	5	-0.39447	0.9929	0.99547	1	3140	0	-0.39447
MANBAL	5	0.0071186	0.015071	0.528124	103	3	-0.19112	0.60918	0.74301	1	2223	1	-0.19112
MPP4	5	0.0071282	0.015071	0.528124	104	5	-0.37858	0.99287	0.99547	1	3139	0	-0.37858
SLC38A2	5	0.0071632	0.015071	0.528124	105	5	-0.67554	0.99284	0.99547	1	3138	0	-0.67554
NAA35	5	0.0073368	0.015162	0.528124	106	4	-0.95041	0.26205	0.462	1	1365	1	-0.95041
DPM2	5	0.0073567	0.015164	0.528124	107	3	-0.69673	0.051316	0.1466	1	432	1	-0.69673
PIGF	5	0.007394	0.015448	0.528124	108	4	-0.60422	0.8909	0.90493	1	2816	0	-0.60422
FAH	5	0.0074206	0.01545	0.528124	109	2	-0.12235	0.45556	0.62398	1	1884	1	-0.12235
ABCA8	5	0.0074646	0.015575	0.528124	110	4	-0.85963	0.78101	0.81409	1	2508	1	-0.85963
CES1	5	0.0074861	0.015687	0.528124	111	4	-0.64911	0.25054	0.45695	1	1337	1	-0.64911
CEPT1	5	0.0075876	0.015783	0.528124	112	3	-0.84449	0.016747	0.056036	1	177	2	-0.84449
SLC5A3	5	0.0076826	0.015931	0.528124	113	3	-0.46516	0.86376	0.87901	1	2722	1	-0.46516
SLC12A2	5	0.0077144	0.015933	0.528124	114	2	0.062938	0.81015	0.82846	1	2575	1	0.062938
ABCC2	5	0.0077226	0.015933	0.528124	115	2	0.0088681	0.049275	0.14605	1	420	1	0.0088681
RETSAT	5	0.00785	0.016071	0.528124	116	4	-0.60323	0.98877	0.99225	1	3129	0	-0.60323
KCNB1	5	0.0081471	0.016861	0.544764	117	3	-0.48147	0.88023	0.89657	1	2779	0	-0.48147
GNE	5	0.0082318	0.016863	0.544764	118	3	-0.30586	0.92859	0.93922	1	2929	0	-0.30586
SATL1	5	0.0083262	0.017325	0.550241	119	3	-0.77178	0.79309	0.81698	1	2536	1	-0.77178
LIPT2	5	0.0083636	0.017328	0.550241	120	4	-0.94515	0.92733	0.93848	1	2924	0	-0.94515
AHCY	5	0.0084298	0.017466	0.550241	121	3	-0.7753	0.90386	0.9202	1	2852	0	-0.7753
ASRGL1	5	0.0085966	0.017681	0.552467	122	3	-0.55932	0.21441	0.4325	1	1238	2	-0.55932
GFER	5	0.0088665	0.018842	0.557388	123	3	-0.33045	0.22363	0.44151	1	1265	1	-0.33045
SLC7A10	5	0.0089296	0.018845	0.557388	124	2	0.071589	0.39661	0.58203	1	1737	2	0.071589
ODC1	5	0.0089584	0.018845	0.557388	125	3	-0.86044	0.12766	0.29247	1	850	1	-0.86044
CIDEA	5	0.0091059	0.019006	0.557388	126	2	0.090153	0.096136	0.23171	1	668	2	0.090153
PIK3R3	5	0.0091111	0.019006	0.557388	127	3	-0.57213	0.87323	0.88864	1	2751	0	-0.57213
PRDX5	5	0.0092312	0.019006	0.557388	128	2	-0.05552	0.88413	0.89893	1	2794	0	-0.05552
ALG5	5	0.009244	0.019006	0.557388	129	4	-0.41657	0.89646	0.91167	1	2835	0	-0.41657
SULT1B1	5	0.0093769	0.019008	0.557388	130	4	-0.39662	0.81191	0.82984	1	2580	1	-0.39662
CYP1A1	5	0.0095327	0.019193	0.558499	131	3	-0.43126	0.93961	0.94548	1	2960	0	-0.43126
SLC16A5	5	0.0096107	0.019544	0.561807	132	4	-0.58656	0.86724	0.87902	1	2732	0	-0.58656
OXCT1	5	0.0097579	0.019746	0.561807	133	4	-0.51259	0.15641	0.32436	1	988	1	-0.51259
FDXR	5	0.0098089	0.019749	0.561807	134	4	-0.40305	0.2119	0.43118	1	1232	1	-0.40305
PRPSAP1	5	0.010057	0.020489	0.578548	135	3	-1.109	0.35938	0.54067	1	1648	1	-1.109
AGMO	5	0.010129	0.021042	0.581474	136	2	0.028631	0.51651	0.69673	1	2074	1	0.028631
UQCRC2	5	0.010135	0.021045	0.581474	137	3	-0.35859	0.93815	0.94548	1	2958	0	-0.35859
GABRG1	5	0.010202	0.021286	0.581474	138	4	-0.39285	0.73234	0.78305	1	2426	1	-0.39285
SLC6A17	5	0.010347	0.021486	0.581474	139	4	-0.7297	0.70442	0.76996	1	2382	1	-0.7297
ALG1	5	0.010437	0.021486	0.581474	140	3	-0.59588	0.77222	0.8071	1	2487	1	-0.59588
FOXRED2	5	0.010492	0.021658	0.581474	141	3	-0.59427	0.5233	0.70286	1	2092	2	-0.59427
FUT11	5	0.010509	0.02166	0.581474	142	4	-0.58229	0.97667	0.98238	1	3088	0	-0.58229
CA9	5	0.010641	0.02251	0.59184	143	3	-0.38444	0.38471	0.56736	1	1714	1	-0.38444
PIGA	5	0.010669	0.022512	0.59184	144	4	-0.6312	0.77948	0.81124	1	2504	1	-0.6312
CYB5R4	5	0.010694	0.022512	0.59184	145	4	-0.48254	0.57264	0.72881	1	2174	1	-0.48254
SACM1L	5	0.010738	0.023141	0.600088	146	3	-0.15815	0.15082	0.31786	1	963	2	-0.15815
GAMT	5	0.010779	0.023141	0.600088	147	4	-0.47764	0.96551	0.97199	1	3052	0	-0.47764
NNMT	5	0.011127	0.030832	0.746029	148	2	0.10767	0.34	0.52828	1	1583	2	0.10767
FDPS	5	0.011141	0.030832	0.746029	149	3	-0.50161	0.98189	0.98629	1	3107	0	-0.50161
AASDHPPT	5	0.011179	0.030832	0.746029	150	4	-0.50363	0.33036	0.52081	1	1553	1	-0.50363
IMPDH2	5	0.011203	0.030834	0.746029	151	2	-0.043454	0.84402	0.85538	1	2665	1	-0.043454
NDUFS1	5	0.011279	0.030834	0.746029	152	2	0.073999	0.73775	0.786	1	2434	1	0.073999
PHF8	5	0.01134	0.031029	0.746029	153	4	-0.4881	0.95273	0.95855	1	3007	0	-0.4881
ABCA12	5	0.0116	0.031231	0.746029	154	4	-0.71372	0.36931	0.55672	1	1670	1	-0.71372
FH	5	0.011623	0.031434	0.746029	155	3	-0.35131	0.33935	0.52682	1	1582	2	-0.35131
ELOVL5	5	0.011641	0.031434	0.746029	156	1	-0.11609	0.35678	0.53553	1	1638	2	-0.11609
DGKI	5	0.011942	0.032052	0.746029	157	3	-0.68873	0.17845	0.37806	1	1109	1	-0.68873
TET2	5	0.011949	0.032052	0.746029	158	4	-0.42684	0.67129	0.7556	1	2321	1	-0.42684
PPIP5K1	5	0.012012	0.032052	0.746029	159	3	-0.35827	0.51939	0.70134	1	2078	1	-0.35827
UQCRHL	5	0.012243	0.032416	0.746029	160	3	-0.3614	0.78074	0.81265	1	2507	1	-0.3614
MMAA	5	0.012258	0.032598	0.746029	161	4	-0.42511	0.69313	0.76856	1	2355	1	-0.42511
ALMS1	5	0.012271	0.0326	0.746029	162	3	-0.61341	0.10377	0.25159	1	715	2	-0.61341
ACAD10	5	0.01233	0.033081	0.746029	163	4	-0.46504	0.96526	0.97199	1	3050	0	-0.46504
FLVCR1	5	0.012419	0.033081	0.746029	164	3	-0.46593	0.90622	0.92224	1	2859	0	-0.46593
ABCE1	5	0.012438	0.033083	0.746029	165	3	-0.75616	0.91374	0.92726	1	2882	0	-0.75616
ATP5MG	5	0.012766	0.034465	0.746029	166	3	-0.24889	0.95099	0.95671	1	3002	0	-0.24889
GRIK4	5	0.012844	0.034465	0.746029	167	3	-0.18903	0.62093	0.74574	1	2237	1	-0.18903
CLCN3	5	0.013049	0.034468	0.746029	168	2	-0.12967	0.73817	0.786	1	2435	1	-0.12967
FHIT	5	0.013145	0.034468	0.746029	169	2	-0.022388	0.32365	0.51683	1	1537	2	-0.022388
UROD	5	0.013217	0.034468	0.746029	170	3	-0.46601	0.38753	0.57295	1	1721	2	-0.46601
COX19	5	0.013352	0.034665	0.746029	171	4	-0.68439	0.069236	0.18438	1	522	1	-0.68439
SLC25A25	5	0.013446	0.034665	0.746029	172	2	-0.23258	0.12111	0.282	1	807	2	-0.23258
SLC37A1	5	0.013745	0.034668	0.746029	173	3	-0.47283	0.45141	0.62208	1	1873	2	-0.47283
AQP4	5	0.013834	0.034668	0.746029	174	4	-0.38525	0.67956	0.76003	1	2332	1	-0.38525
NDST2	5	0.013873	0.034881	0.746029	175	4	-0.33791	0.96883	0.9749	1	3063	0	-0.33791
LIPT1	5	0.014005	0.03513	0.746029	176	4	-0.50216	0.90567	0.92127	1	2858	0	-0.50216
DAGLA	5	0.014046	0.03513	0.746029	177	3	-0.21731	0.30444	0.50335	1	1485	2	-0.21731
ELOVL1	5	0.01421	0.035616	0.746029	178	3	-0.39072	0.38535	0.56944	1	1717	2	-0.39072
UST	5	0.014347	0.035616	0.746029	179	3	-0.21401	0.4488	0.62027	1	1865	1	-0.21401
CYP46A1	5	0.01435	0.035616	0.746029	180	4	-0.65197	0.37225	0.55886	1	1678	1	-0.65197
HOGA1	5	0.014409	0.035618	0.746029	181	3	-0.67948	0.13796	0.30307	1	904	1	-0.67948
AK4	5	0.014507	0.035618	0.746029	182	4	-0.48404	0.7911	0.81698	1	2531	1	-0.48404
PDE12	5	0.014647	0.036109	0.750266	183	3	-0.39843	0.57234	0.72881	1	2172	1	-0.39843
RIMKLA	5	0.014688	0.036348	0.750266	184	4	-0.4081	0.77166	0.8071	1	2484	1	-0.4081
SLC16A1	5	0.014758	0.036605	0.750266	185	4	-0.48233	0.83431	0.84708	1	2639	1	-0.48233
APOA2	5	0.014784	0.036608	0.750266	186	4	-0.48803	0.91972	0.931	1	2895	0	-0.48803
ABCF1	5	0.014947	0.037353	0.758264	187	4	-0.35175	0.77138	0.8071	1	2483	1	-0.35175
ITPR3	5	0.015101	0.037592	0.758264	188	4	-0.30477	0.88531	0.90017	1	2798	0	-0.30477
GADL1	5	0.015157	0.037595	0.758264	189	4	-0.38613	0.84904	0.858	1	2674	1	-0.38613
COX7C	5	0.015416	0.045177	0.813274	190	2	0.27253	0.085176	0.22026	1	607	3	0.27253
PGAM5	5	0.015636	0.045901	0.813274	191	4	-0.66433	0.96455	0.97069	1	3048	0	-0.66433
UCK2	5	0.015768	0.045904	0.813274	192	3	-0.63235	0.33497	0.52081	1	1570	1	-0.63235
KDM6A	5	0.015847	0.046192	0.813274	193	2	0.037644	0.50346	0.67803	1	2040	1	0.037644
NMRK2	5	0.015857	0.046192	0.813274	194	2	-0.075536	0.1985	0.41671	1	1194	1	-0.075536
SLC15A3	5	0.016009	0.046192	0.813274	195	4	-0.43067	0.97288	0.97724	1	3079	0	-0.43067
MGLL	5	0.016147	0.046195	0.813274	196	2	0.43427	0.04674	0.14383	1	410	3	0.43427
MPO	5	0.016198	0.046195	0.813274	197	4	-0.37212	0.91932	0.931	1	2892	0	-0.37212
SLC41A1	5	0.016208	0.046195	0.813274	198	3	-0.55738	0.96115	0.96729	1	3038	0	-0.55738
GCNT1	5	0.016304	0.046195	0.813274	199	2	0.15061	0.08762	0.22309	1	619	3	0.15061
AS3MT	5	0.016447	0.046717	0.813274	200	2	-0.24041	0.97856	0.98393	1	3093	0	-0.24041
KCNA1	5	0.016673	0.047283	0.813274	201	3	-0.47469	0.10493	0.25159	1	721	2	-0.47469
APOC2	5	0.016711	0.047283	0.813274	202	2	-0.19261	0.89391	0.90946	1	2828	0	-0.19261
PFAS	5	0.016986	0.047286	0.813274	203	4	-0.36401	0.95891	0.96578	1	3029	0	-0.36401
LOXL2	5	0.017122	0.047605	0.813274	204	4	-0.37368	0.5204	0.70286	1	2081	1	-0.37368
CAD	5	0.017346	0.047608	0.813274	205	2	-0.12053	0.64755	0.75135	1	2275	1	-0.12053
GALNT17	5	0.017442	0.047943	0.813274	206	3	-0.49694	0.93562	0.94313	1	2949	0	-0.49694
SLC25A26	5	0.017546	0.048911	0.813274	207	3	-0.66563	0.88897	0.90492	1	2810	0	-0.66563
PLCE1	5	0.017582	0.048914	0.813274	208	4	-0.36966	0.80413	0.82566	1	2557	1	-0.36966
HMBS	5	0.017646	0.048914	0.813274	209	4	-0.59006	0.76772	0.80134	1	2480	1	-0.59006
PIK3C3	5	0.017765	0.049504	0.813274	210	3	-0.57573	0.44851	0.62027	1	1863	2	-0.57573
ATP10B	5	0.017894	0.049506	0.813274	211	4	-0.54788	0.94226	0.94714	1	2973	0	-0.54788
KCNE1L	5	0.017945	0.050231	0.813274	212	3	-0.47591	0.42813	0.60899	1	1817	1	-0.47591
NPL	5	0.01796	0.050231	0.813274	213	3	-0.32668	0.06031	0.16039	1	478	2	-0.32668
ITPA	5	0.018021	0.050233	0.813274	214	4	-0.5488	0.18904	0.39312	1	1149	1	-0.5488
SLC27A4	5	0.018244	0.05081	0.813274	215	1	-0.085116	0.48173	0.65104	1	1971	2	-0.085116
CYP2D6	5	0.018422	0.051145	0.813274	216	3	-0.69882	0.22685	0.44271	1	1272	1	-0.69882
PDE4B	5	0.018481	0.051459	0.813274	217	3	-0.30124	0.72088	0.7801	1	2408	1	-0.30124
MGAT5	5	0.018544	0.051787	0.813274	218	3	-0.53464	0.92461	0.93357	1	2916	0	-0.53464
GBA1	5	0.018674	0.051789	0.813274	219	4	-0.32802	0.21516	0.4325	1	1240	1	-0.32802
EPN1	5	0.018708	0.051789	0.813274	220	3	-0.73594	0.053353	0.14661	1	445	1	-0.73594
NRF1	5	0.018843	0.052106	0.813274	221	2	-0.0053913	0.55656	0.71877	1	2149	1	-0.0053913
SLC22A5	5	0.018853	0.052106	0.813274	222	4	-0.47947	0.96003	0.96632	1	3033	0	-0.47947
KCNJ16	5	0.018864	0.052106	0.813274	223	2	0.10788	0.11175	0.266	1	760	1	0.10788
SLC22A25	5	0.019142	0.054106	0.813274	224	1	0.2007	0.093758	0.23171	1	652	3	0.2007
GSTCD	5	0.019298	0.054109	0.813274	225	4	-0.31073	0.53819	0.71461	1	2126	1	-0.31073
AHCYL2	5	0.019428	0.054109	0.813274	226	4	-0.46023	0.64623	0.75135	1	2273	1	-0.46023
SMPD3	5	0.019558	0.054457	0.813274	227	3	-0.67154	0.0010628	0.0042142	1	15	2	-0.67154
ATP6V0D1	5	0.01974	0.054459	0.813274	228	2	-0.15048	0.85497	0.87056	1	2687	1	-0.15048
SULT1A2	5	0.019805	0.054792	0.813274	229	3	-0.46524	0.36831	0.55453	1	1665	2	-0.46524
MCEE	5	0.01988	0.055072	0.813274	230	4	-0.70353	0.94662	0.95077	1	2987	0	-0.70353
KCNH2	5	0.020003	0.055072	0.813274	231	3	-0.47251	0.97988	0.98527	1	3100	0	-0.47251
ATP6V1G1	5	0.020028	0.055072	0.813274	232	4	-0.41188	0.91391	0.92726	1	2883	0	-0.41188
HSD17B10	5	0.020039	0.055072	0.813274	233	3	-0.40687	0.1493	0.31786	1	957	2	-0.40687
SLC39A12	5	0.02005	0.055072	0.813274	234	4	-0.37909	0.97804	0.98393	1	3091	0	-0.37909
ACAD8	5	0.020169	0.055075	0.813274	235	4	-0.38114	0.92399	0.93356	1	2913	0	-0.38114
ABCC11	5	0.020338	0.055075	0.813274	236	1	-0.062273	0.82161	0.83267	1	2606	1	-0.062273
FTH1	5	0.020531	0.055415	0.813274	237	3	-0.54229	0.65201	0.75276	1	2285	1	-0.54229
KCNK15	5	0.020607	0.055415	0.813274	238	3	-0.55741	0.96059	0.96729	1	3036	0	-0.55741
EPN2	5	0.020637	0.055415	0.813274	239	4	-0.28544	0.99114	0.99389	1	3133	0	-0.28544
MGST1	5	0.02083	0.055415	0.813274	240	3	-0.34329	0.5694	0.72591	1	2168	1	-0.34329
KCNK16	5	0.020862	0.055415	0.813274	241	3	-0.4731	0.81556	0.83267	1	2589	1	-0.4731
CYP2C18	5	0.020936	0.055418	0.813274	242	1	0.13229	0.088623	0.22309	1	624	2	0.13229
ATP7B	5	0.020981	0.055418	0.813274	243	2	-0.16024	0.93632	0.94313	1	2951	0	-0.16024
KCTD3	5	0.021353	0.055418	0.813274	244	4	-0.31249	0.91232	0.92623	1	2879	0	-0.31249
STARD5	5	0.021386	0.055418	0.813274	245	2	-0.02095	0.1551	0.32325	1	986	2	-0.02095
SLC12A1	5	0.021407	0.055418	0.813274	246	4	-0.37397	0.042253	0.14091	1	382	1	-0.37397
NAGA	5	0.021437	0.055716	0.813274	247	2	-0.16088	0.12548	0.29247	1	832	1	-0.16088
CKB	5	0.021538	0.05607	0.813274	248	3	-0.30183	0.35168	0.53421	1	1621	2	-0.30183
B4GAT1	5	0.021589	0.056072	0.813274	249	2	-0.049113	0.86663	0.87902	1	2729	0	-0.049113
SLC26A7	5	0.021612	0.056072	0.813274	250	4	-0.39871	0.94152	0.94633	1	2969	0	-0.39871
GALNT8	5	0.021948	0.056368	0.813274	251	3	-0.24522	0.93446	0.94313	1	2945	0	-0.24522
DOT1L	5	0.022072	0.056368	0.813274	252	4	-0.39475	0.41301	0.59099	1	1775	1	-0.39475
SLC37A3	5	0.02213	0.056368	0.813274	253	3	-0.65041	0.16223	0.3324	1	1025	1	-0.65041
ALOX15	5	0.022291	0.056371	0.813274	254	4	-0.46153	0.94852	0.95414	1	2995	0	-0.46153
UGT1A8	5	0.022569	0.056664	0.813274	255	2	-0.025322	0.69455	0.76856	1	2359	1	-0.025322
NDUFA13	5	0.022726	0.056997	0.813274	256	1	-0.080068	0.94849	0.95414	1	2994	0	-0.080068
CYP2R1	5	0.022902	0.057	0.813274	257	4	-0.41168	0.95701	0.96482	1	3019	0	-0.41168
IP6K3	5	0.023025	0.057	0.813274	258	2	-0.10728	0.89631	0.91167	1	2834	0	-0.10728
SLC12A3	5	0.023198	0.057724	0.813274	259	3	-0.37272	0.4142	0.59575	1	1780	1	-0.37272
CLIC3	5	0.023202	0.057724	0.813274	260	4	-0.34123	0.9796	0.98503	1	3099	0	-0.34123
KCTD5	5	0.023296	0.057724	0.813274	261	4	-0.56111	0.65227	0.75276	1	2286	1	-0.56111
TRPC1	5	0.023323	0.058067	0.813274	262	2	-0.07673	0.8251	0.83412	1	2615	1	-0.07673
ENTPD4	5	0.02339	0.058823	0.813274	263	4	-0.42937	0.22809	0.44271	1	1273	1	-0.42937
B3GNT7	5	0.023407	0.058823	0.813274	264	3	-0.47971	0.97343	0.97762	1	3082	0	-0.47971
EDN2	5	0.023515	0.058825	0.813274	265	3	-0.21702	0.96604	0.97243	1	3053	0	-0.21702
ATP5F1D	5	0.023572	0.058825	0.813274	266	3	-0.35478	0.46188	0.6324	1	1910	1	-0.35478
ND4	5	0.023621	0.058825	0.813274	267	3	-0.33932	0.0071186	0.024525	1	88	1	-0.33932
CRLS1	5	0.023781	0.059854	0.813274	268	3	-0.34777	0.21969	0.43629	1	1255	2	-0.34777
MINPP1	5	0.02406	0.059857	0.813274	269	4	-0.49999	0.77176	0.8071	1	2485	1	-0.49999
ACOT13	5	0.024196	0.060693	0.813274	270	4	-0.57356	0.74901	0.79021	1	2450	1	-0.57356
CP	5	0.024217	0.060693	0.813274	271	3	-0.40535	0.41908	0.60127	1	1794	2	-0.40535
SFXN1	5	0.024323	0.060696	0.813274	272	3	-0.52878	0.19045	0.3999	1	1157	2	-0.52878
OGT	5	0.024491	0.061332	0.813274	273	3	-0.78196	0.37517	0.55886	1	1684	1	-0.78196
SLC9A4	5	0.024515	0.061332	0.813274	274	2	0.072401	0.80114	0.82421	1	2552	1	0.072401
PDE2A	5	0.024532	0.061334	0.813274	275	2	-0.2476	0.19876	0.41671	1	1196	1	-0.2476
ALOXE3	5	0.024586	0.061745	0.813274	276	4	-0.39421	0.89033	0.90492	1	2814	0	-0.39421
ATP12A	5	0.024684	0.061745	0.813274	277	4	-0.31524	0.18492	0.38418	1	1135	1	-0.31524
LDHA	5	0.024748	0.061745	0.813274	278	2	-0.067471	0.34563	0.52967	1	1600	2	-0.067471
UPB1	5	0.024911	0.061747	0.813274	279	3	-0.217	0.63795	0.75135	1	2255	1	-0.217
CYP21A2	5	0.024921	0.061747	0.813274	280	4	-0.44954	0.91652	0.93006	1	2888	0	-0.44954
ATP10D	5	0.02511	0.061747	0.813274	281	3	-0.38478	0.34512	0.52967	1	1599	2	-0.38478
GDPD3	5	0.025348	0.06254	0.813274	282	2	0.0022454	0.72953	0.78305	1	2422	1	0.0022454
PIGC	5	0.025408	0.06254	0.813274	283	1	-0.055436	0.53491	0.71173	1	2122	1	-0.055436
RPN1	5	0.025705	0.06254	0.813274	284	1	0.21263	0.13472	0.30074	1	888	3	0.21263
RRM1	5	0.025788	0.06254	0.813274	285	2	-0.10838	0.17959	0.37944	1	1113	2	-0.10838
SGMS1	5	0.025844	0.06254	0.813274	286	4	-0.38199	0.96061	0.96729	1	3037	0	-0.38199
LEP	5	0.025896	0.062542	0.813274	287	3	-0.43395	0.89335	0.90832	1	2826	0	-0.43395
DHRS7	5	0.025899	0.062542	0.813274	288	3	-0.62438	0.54454	0.71751	1	2134	1	-0.62438
PLA2G4E	5	0.025954	0.062542	0.813274	289	3	-0.4704	0.9518	0.95671	1	3006	0	-0.4704
LYPLA2	5	0.025955	0.062542	0.813274	290	4	-0.3871	0.98451	0.98754	1	3118	0	-0.3871
CYP11B2	5	0.0263	0.062542	0.813274	291	2	0.040199	0.29937	0.49709	1	1463	2	0.040199
SLC13A3	5	0.026424	0.062542	0.813274	292	4	-0.65876	0.92426	0.93356	1	2914	0	-0.65876
PGAM2	5	0.026597	0.062934	0.813274	293	2	-0.12107	0.17037	0.35998	1	1062	2	-0.12107
CNGA1	5	0.026735	0.062934	0.813274	294	3	-0.6206	0.92279	0.93262	1	2908	0	-0.6206
PI4K2B	5	0.026903	0.062937	0.813274	295	2	0.1283	0.47338	0.64439	1	1947	2	0.1283
NAA60	5	0.027294	0.069599	0.889224	296	4	-0.81319	0.92212	0.93262	1	2905	0	-0.81319
GABRQ	5	0.027355	0.069602	0.889224	297	2	-0.075959	0.45771	0.62398	1	1892	2	-0.075959
ALOX5	5	0.02757	0.069978	0.889224	298	4	-0.39887	0.92449	0.93357	1	2915	0	-0.39887
NIT2	5	0.027772	0.069981	0.889224	299	3	-0.47763	0.28603	0.49106	1	1427	2	-0.47763
CHSY1	5	0.027786	0.069981	0.889224	300	2	0.17576	0.49377	0.66848	1	2001	2	0.17576
ALDOB	5	0.02804	0.071181	0.895517	301	4	-0.38546	0.98779	0.99098	1	3126	0	-0.38546
GALNS	5	0.028083	0.071181	0.895517	302	3	-0.21877	0.56909	0.72591	1	2167	1	-0.21877
CYBRD1	5	0.028096	0.071181	0.895517	303	2	-0.10944	0.29019	0.4923	1	1440	2	-0.10944
DGLUCY	5	0.028582	0.078516	0.946845	304	4	-0.30829	0.49981	0.6736	1	2022	1	-0.30829
MMEL1	5	0.028672	0.078516	0.946845	305	3	-0.43304	0.22596	0.44271	1	1270	2	-0.43304
COX3	5	0.028677	0.078516	0.946845	306	2	0.053706	0.75369	0.79153	1	2459	1	0.053706
NDUFA8	5	0.028974	0.079349	0.946845	307	2	-0.11486	0.85914	0.87611	1	2703	1	-0.11486
ASAH1	5	0.028976	0.079349	0.946845	308	4	-0.66008	0.98108	0.98603	1	3105	0	-0.66008
ASPHD2	5	0.029078	0.079349	0.946845	309	2	-0.082922	0.42392	0.60569	1	1805	2	-0.082922
NMNAT3	5	0.029253	0.080085	0.946845	310	3	-0.24944	0.028083	0.088728	1	268	1	-0.24944
SLC4A4	5	0.02927	0.080085	0.946845	311	2	0.20925	0.084354	0.22026	1	603	3	0.20925
PIK3CA	5	0.029487	0.080503	0.946845	312	3	-0.34933	0.49402	0.6702	1	2002	1	-0.34933
ATP6V1H	5	0.029567	0.080503	0.946845	313	3	-0.67248	0.040286	0.12115	1	371	2	-0.67248
AACS	5	0.029664	0.080505	0.946845	314	4	-0.33561	0.30235	0.50201	1	1478	1	-0.33561
PIR	5	0.029687	0.080505	0.946845	315	4	-0.43732	0.55624	0.71877	1	2147	1	-0.43732
ABCB4	5	0.029863	0.08082	0.946845	316	2	-0.21047	0.13038	0.29417	1	865	1	-0.21047
CYP2A13	5	0.030016	0.080822	0.946845	317	2	0.0053796	0.43535	0.61234	1	1831	2	0.0053796
CHI3L1	5	0.03016	0.081209	0.946845	318	2	0.30988	0.085189	0.22026	1	608	3	0.30988
A3GALT2	5	0.03073	0.081939	0.946845	319	4	-0.25176	0.81047	0.82846	1	2577	1	-0.25176
CHRNB2	5	0.030753	0.081939	0.946845	320	2	0.03699	0.61672	0.74432	1	2232	1	0.03699
BCKDHA	5	0.030787	0.081939	0.946845	321	3	-0.61899	0.74961	0.79021	1	2451	1	-0.61899
CES3	5	0.030906	0.08229	0.946845	322	3	-0.53401	0.25174	0.45816	1	1340	2	-0.53401
ATP13A5	5	0.031049	0.08229	0.946845	323	3	-0.1984	0.85562	0.87057	1	2691	1	-0.1984
CYP2W1	5	0.031098	0.08229	0.946845	324	4	-0.4213	0.98453	0.98754	1	3119	0	-0.4213
SLC35E2B	5	0.031206	0.082292	0.946845	325	3	-0.75137	0.065214	0.18254	1	498	2	-0.75137
PECR	5	0.031266	0.082292	0.946845	326	2	0.15164	0.47469	0.64439	1	1949	2	0.15164
NDUFS3	5	0.031446	0.082292	0.946845	327	4	-0.43501	0.33322	0.52081	1	1562	1	-0.43501
NT5DC4	5	0.031641	0.082757	0.946845	328	4	-0.2557	0.96232	0.96832	1	3042	0	-0.2557
ACBD4	5	0.031797	0.08276	0.946845	329	4	-0.45937	0.99217	0.99501	1	3136	0	-0.45937
HSD17B2	5	0.031808	0.08276	0.946845	330	2	-0.11265	0.16062	0.33028	1	1008	2	-0.11265
ATP5MF	5	0.031915	0.083206	0.946845	331	4	-0.33292	0.68659	0.76855	1	2346	1	-0.33292
POMT1	5	0.031929	0.083206	0.946845	332	3	-0.4957	0.29961	0.49827	1	1465	1	-0.4957
PAPSS1	5	0.031937	0.083206	0.946845	333	2	0.30964	0.08162	0.21632	1	587	3	0.30964
AWAT1	5	0.03199	0.083206	0.946845	334	3	-0.38735	0.24691	0.45695	1	1328	1	-0.38735
SLC43A1	5	0.032058	0.083209	0.946845	335	4	-0.5732	0.23791	0.45046	1	1304	1	-0.5732
ST3GAL5	5	0.032294	0.090061	1	336	2	-0.13293	0.33553	0.52081	1	1572	2	-0.13293
NDUFA1	5	0.032508	0.090544	1	337	4	-0.48989	0.97763	0.98365	1	3089	0	-0.48989
NT5DC1	5	0.032529	0.090544	1	338	2	0.063994	0.4831	0.65104	1	1976	2	0.063994
DTYMK	5	0.032699	0.090544	1	339	4	-0.28154	0.85703	0.87191	1	2695	1	-0.28154
PLD3	5	0.032795	0.090544	1	340	4	-0.31404	0.98722	0.9904	1	3125	0	-0.31404
APOBR	5	0.032926	0.090547	1	341	4	-0.58944	0.0098341	0.035803	1	119	1	-0.58944
ABCD2	5	0.032987	0.090547	1	342	4	-0.27631	0.99197	0.9949	1	3135	0	-0.27631
ENOPH1	5	0.033423	0.090962	1	343	4	-0.30162	0.8867	0.90136	1	2806	0	-0.30162
P2RX7	5	0.033789	0.092333	1	344	4	-0.5397	0.96894	0.97532	1	3064	0	-0.5397
HSD17B12	5	0.034018	0.092845	1	345	2	-0.16594	0.19697	0.4167	1	1185	1	-0.16594
AQP11	5	0.034303	0.093876	1	346	3	-0.40443	0.061177	0.16545	1	483	1	-0.40443
CRPPA	5	0.034322	0.093876	1	347	3	-0.75063	0.68695	0.76855	1	2347	1	-0.75063
SLN	5	0.034598	0.093879	1	348	2	0.16812	0.22177	0.44151	1	1260	2	0.16812
ARSH	5	0.034655	0.093879	1	349	4	-0.37749	0.86395	0.87901	1	2724	1	-0.37749
DGKA	5	0.03468	0.093879	1	350	4	-0.36609	0.60818	0.74154	1	2221	1	-0.36609
INPP1	5	0.034876	0.093879	1	351	3	-0.67466	0.52342	0.70286	1	2093	2	-0.67466
DOHH	5	0.034895	0.099544	1	352	2	-0.051274	0.80626	0.827	1	2564	1	-0.051274
COQ6	5	0.034911	0.099544	1	353	3	-0.37448	0.13364	0.30073	1	880	1	-0.37448
ATP2A1	5	0.035021	0.10026	1	354	3	-0.23262	0.62274	0.74859	1	2240	1	-0.23262
MOCS1	5	0.035189	0.10026	1	355	2	-0.036191	0.93027	0.94073	1	2934	0	-0.036191
PISD	5	0.0354	0.10026	1	356	3	-0.46344	0.97013	0.97571	1	3067	0	-0.46344
ORAI2	5	0.035484	0.10026	1	357	3	-0.328	0.98434	0.98731	1	3116	0	-0.328
COQ2	5	0.035591	0.10062	1	358	3	-0.46288	0.70795	0.77137	1	2386	1	-0.46288
PKD2L1	5	0.035654	0.10108	1	359	2	-0.1357	0.78477	0.8141	1	2517	1	-0.1357
GMPS	5	0.035779	0.10161	1	360	4	-0.35186	0.59949	0.74003	1	2212	1	-0.35186
CLCN1	5	0.036074	0.10389	1	361	3	-0.36955	0.90817	0.92326	1	2866	0	-0.36955
NANS	5	0.0362	0.10437	1	362	4	-0.42993	0.56692	0.72306	1	2164	1	-0.42993
KCNG2	5	0.036251	0.10437	1	363	4	-0.31282	0.46887	0.63568	1	1933	1	-0.31282
ATP6V0A4	5	0.036641	0.10717	1	364	3	-0.38608	0.18389	0.38418	1	1133	1	-0.38608
STARD8	5	0.036742	0.10717	1	365	4	-0.60997	0.9417	0.94633	1	2970	0	-0.60997
NT5C2	5	0.036857	0.10717	1	366	3	-0.43293	0.45871	0.62543	1	1899	2	-0.43293
SLC9C1	5	0.036898	0.10717	1	367	4	-0.37882	0.9505	0.95608	1	3000	0	-0.37882
HVCN1	5	0.036934	0.10717	1	368	3	-0.35126	0.047063	0.14383	1	411	2	-0.35126
CYB5B	5	0.036959	0.10717	1	369	3	-0.2756	0.84396	0.85538	1	2664	1	-0.2756
OAS1	5	0.037133	0.10798	1	370	4	-0.83957	0.42051	0.6027	1	1797	1	-0.83957
SLC13A2	5	0.037253	0.10798	1	371	3	-0.32922	0.30152	0.4995	1	1475	2	-0.32922
TIGAR	5	0.037362	0.10839	1	372	3	-0.53384	0.10367	0.25071	1	712	2	-0.53384
HLCS	5	0.037471	0.1084	1	373	3	-0.39658	0.48889	0.65721	1	1992	1	-0.39658
LYPLAL1	5	0.037818	0.10881	1	374	4	-0.39643	0.94285	0.94714	1	2978	0	-0.39643
KMT5B	5	0.037843	0.10881	1	375	3	-0.29899	0.53884	0.71461	1	2128	1	-0.29899
KCNJ14	5	0.037973	0.10881	1	376	2	0.23891	0.18989	0.3985	1	1155	3	0.23891
PLA2G3	5	0.038057	0.10881	1	377	4	-0.45448	0.11616	0.27776	1	781	1	-0.45448
ATP1B3	5	0.038103	0.10881	1	378	3	-0.66772	0.7012	0.76995	1	2374	1	-0.66772
PMVK	5	0.03811	0.10881	1	379	4	-0.365	0.53622	0.71173	1	2125	1	-0.365
SLC6A4	5	0.038299	0.11428	1	380	3	-0.28553	0.72985	0.78305	1	2423	1	-0.28553
OGFOD3	5	0.038432	0.11428	1	381	2	-0.080652	0.30007	0.49827	1	1467	2	-0.080652
C14orf169	5	0.038726	0.11428	1	382	1	-0.15071	0.76373	0.80133	1	2475	1	-0.15071
UGT2B10	5	0.038957	0.11496	1	383	3	-0.2122	0.84958	0.85934	1	2675	1	-0.2122
CRYZ	5	0.03902	0.11496	1	384	4	-0.24966	0.98707	0.9904	1	3124	0	-0.24966
TKT	5	0.039314	0.11541	1	385	3	-0.18701	0.21014	0.42986	1	1227	1	-0.18701
UGT1A3	5	0.039498	0.11541	1	386	3	-0.33088	0.74404	0.79021	1	2441	1	-0.33088
SCO2	5	0.039609	0.11575	1	387	3	-0.55044	0.89294	0.9061	1	2824	0	-0.55044
LOX	5	0.039732	0.11575	1	388	4	-0.45743	0.86554	0.87902	1	2727	0	-0.45743
INPP5J	5	0.039903	0.1163	1	389	2	-0.26569	0.7618	0.79849	1	2472	1	-0.26569
CLCA2	5	0.039949	0.1163	1	390	4	-0.66904	0.96033	0.96632	1	3035	0	-0.66904
SLC8B1	5	0.040062	0.1163	1	391	4	-0.27391	0.93038	0.94073	1	2936	0	-0.27391
AGXT	5	0.040197	0.1163	1	392	2	-0.25048	0.79343	0.81698	1	2537	1	-0.25048
ATP8A2	5	0.040422	0.11672	1	393	4	-0.35724	0.92998	0.94073	1	2933	0	-0.35724
CHST5	5	0.040491	0.11672	1	394	2	0.025509	0.27623	0.4848	1	1401	1	0.025509
HPRT1	5	0.040672	0.11672	1	395	4	-0.29263	0.9599	0.96632	1	3032	0	-0.29263
L3HYPDH	5	0.040688	0.11672	1	396	4	-0.23807	0.50329	0.67803	1	2039	1	-0.23807
EZH2	5	0.040728	0.11672	1	397	4	-0.26975	0.96212	0.96832	1	3041	0	-0.26975
AK2	5	0.040785	0.11672	1	398	3	-0.53932	0.82396	0.83412	1	2611	1	-0.53932
KCNK6	5	0.040822	0.11672	1	399	3	-0.31383	0.20358	0.42041	1	1212	2	-0.31383
IVD	5	0.04086	0.11672	1	400	3	-0.44665	0.78566	0.81553	1	2521	1	-0.44665
EHD1	5	0.040898	0.11672	1	401	3	-0.47407	0.5395	0.71611	1	2129	1	-0.47407
ABHD14B	5	0.041078	0.1172	1	402	2	-0.12594	0.82336	0.83267	1	2609	1	-0.12594
ARNT2	5	0.041289	0.11816	1	403	4	-0.34332	0.75498	0.79153	1	2462	1	-0.34332
MLXIP	5	0.041435	0.11898	1	404	3	-0.52192	0.015547	0.05028	1	167	2	-0.52192
COX8C	5	0.041666	0.11898	1	405	3	-0.27647	0.94482	0.95007	1	2985	0	-0.27647
ATP6V1E2	5	0.041837	0.11936	1	406	2	-0.052072	0.92606	0.93768	1	2919	0	-0.052072
BPGM	5	0.042015	0.11937	1	407	4	-0.35841	0.44198	0.61549	1	1847	1	-0.35841
SLC46A1	5	0.042109	0.11937	1	408	2	-0.0092369	0.90363	0.9202	1	2851	0	-0.0092369
TYRP1	5	0.042253	0.12023	1	409	3	-0.25518	0.48211	0.65104	1	1973	1	-0.25518
PDE6H	5	0.042587	0.12148	1	410	3	-0.2605	0.23301	0.44788	1	1287	1	-0.2605
HSDL2	5	0.042599	0.12148	1	411	3	-0.60808	0.017354	0.059314	1	183	2	-0.60808
GLRA4	5	0.042713	0.12148	1	412	4	-0.32147	0.96812	0.9749	1	3059	0	-0.32147
EGLN1	5	0.042771	0.12148	1	413	4	-0.23927	0.10148	0.23884	1	702	1	-0.23927
SLC2A1	5	0.04284	0.12148	1	414	1	0.041816	0.58706	0.73438	1	2192	1	0.041816
TPCN1	5	0.043228	0.12273	1	415	3	-0.47482	0.96692	0.97406	1	3058	0	-0.47482
GDPD2	5	0.043343	0.1232	1	416	2	-0.097886	0.47652	0.64947	1	1954	1	-0.097886
PLPP4	5	0.043497	0.12853	1	417	4	-0.3763	0.982	0.98629	1	3108	0	-0.3763
UGT2B28	5	0.043719	0.12853	1	418	2	-0.052024	0.10259	0.24988	1	706	2	-0.052024
NDUFB11	5	0.043848	0.12853	1	419	4	-0.51602	0.5012	0.67658	1	2027	1	-0.51602
CETP	5	0.043877	0.12853	1	420	4	-0.26548	0.89136	0.90493	1	2818	0	-0.26548
CYP4F12	5	0.044012	0.12853	1	421	2	-0.14386	0.26466	0.46697	1	1371	2	-0.14386
ACAA2	5	0.044105	0.12853	1	422	3	-0.28426	0.53556	0.71173	1	2123	1	-0.28426
GLRX	5	0.044231	0.12904	1	423	4	-0.46398	0.5005	0.67509	1	2025	1	-0.46398
FADS1	5	0.044305	0.12904	1	424	2	-0.11986	0.38037	0.5644	1	1702	1	-0.11986
SLC7A9	5	0.044314	0.12904	1	425	2	-0.018845	0.47253	0.64134	1	1943	1	-0.018845
IDO1	5	0.044598	0.12904	1	426	2	0.010724	0.48247	0.65104	1	1974	1	0.010724
PHOSPHO1	5	0.044824	0.12904	1	427	4	-0.3056	0.84594	0.85538	1	2668	1	-0.3056
SOD1	5	0.044891	0.12904	1	428	2	0.14784	0.54648	0.71751	1	2138	1	0.14784
UQCRFS1	5	0.045184	0.12951	1	429	2	0.083836	0.50658	0.68426	1	2047	1	0.083836
PIGL	5	0.045242	0.12951	1	430	4	-0.38908	0.92282	0.93263	1	2909	0	-0.38908
TTYH1	5	0.045363	0.12951	1	431	2	0.32429	0.10102	0.23883	1	700	3	0.32429
LANCL1	5	0.045429	0.12951	1	432	3	-0.51182	0.52306	0.70286	1	2091	2	-0.51182
PNLIPRP2	5	0.045477	0.12951	1	433	2	-0.024382	0.84621	0.85538	1	2669	1	-0.024382
CYP3A5	5	0.045483	0.12951	1	434	4	-0.2468	0.87628	0.89269	1	2762	0	-0.2468
CERS2	5	0.045551	0.12951	1	435	3	-0.53318	0.98366	0.98684	1	3114	0	-0.53318
SLC6A3	5	0.045785	0.13446	1	436	4	-0.43983	0.90283	0.9202	1	2848	0	-0.43983
NDUFA9	5	0.046281	0.13446	1	437	3	-0.27196	0.95289	0.95915	1	3008	0	-0.27196
ZMPSTE24	5	0.046301	0.13446	1	438	4	-0.21329	0.97308	0.97724	1	3080	0	-0.21329
STRA6	5	0.046352	0.13446	1	439	4	-0.31755	0.89769	0.91167	1	2838	0	-0.31755
NME5	5	0.046492	0.13494	1	440	3	-0.97094	0.1112	0.26496	1	759	2	-0.97094
NMNAT1	5	0.046707	0.13494	1	441	2	0.12574	0.2461	0.45695	1	1325	2	0.12574
CARNMT1	5	0.046759	0.13494	1	442	4	-0.33821	0.95726	0.96482	1	3020	0	-0.33821
MOGAT2	5	0.046849	0.13494	1	443	2	-0.11351	0.8033	0.82566	1	2555	1	-0.11351
GNMT	5	0.046939	0.13494	1	444	2	-0.22012	0.0040944	0.017222	1	52	2	-0.22012
DHODH	5	0.047231	0.13494	1	445	3	-0.25019	0.69572	0.76856	1	2363	1	-0.25019
SUOX	5	0.0475	0.13494	1	446	4	-0.39143	0.9582	0.96533	1	3023	0	-0.39143
GLB1L	5	0.048972	0.13666	1	447	4	-0.43905	0.85478	0.87056	1	2686	1	-0.43905
L2HGDH	5	0.048984	0.13666	1	448	2	-0.11135	0.28094	0.48857	1	1414	2	-0.11135
HAO2	5	0.049275	0.13771	1	449	4	-0.25587	0.98949	0.9931	1	3131	0	-0.25587
DHRS9	5	0.049443	0.13771	1	450	3	-0.1838	0.34326	0.52967	1	1591	2	-0.1838
MGAM2	5	0.049567	0.13771	1	451	3	-0.37588	0.91318	0.92726	1	2880	0	-0.37588
ATP2B3	5	0.049859	0.13771	1	452	1	0.35306	0.015437	0.04994	1	165	4	0.35306
ATP8B4	5	0.05015	0.13771	1	453	2	-0.13609	0.38061	0.5644	1	1703	2	-0.13609
PLA2G10	5	0.050173	0.13771	1	454	2	0.072883	0.48906	0.65721	1	1993	2	0.072883
NDUFV3	5	0.050238	0.13828	1	455	3	-0.31559	0.97874	0.98393	1	3094	0	-0.31559
AMT	5	0.050497	0.13886	1	456	3	-0.46953	0.92591	0.93612	1	2918	0	-0.46953
SETD1B	5	0.050703	0.13935	1	457	4	-0.60292	0.82427	0.83412	1	2612	1	-0.60292
HDC	5	0.050713	0.13935	1	458	3	-0.5537	0.66106	0.75415	1	2301	1	-0.5537
APOM	5	0.050733	0.13935	1	459	2	-0.024219	0.33847	0.52225	1	1580	2	-0.024219
CLYBL	5	0.051025	0.13935	1	460	2	-0.038569	0.10871	0.26186	1	750	2	-0.038569
ABHD1	5	0.051321	0.13992	1	461	3	-0.28954	0.95396	0.96043	1	3013	0	-0.28954
CDA	5	0.051898	0.13992	1	462	3	-0.32231	0.97933	0.98478	1	3096	0	-0.32231
ALKBH7	5	0.052019	0.13992	1	463	3	-0.28596	0.95394	0.96043	1	3012	0	-0.28596
ABCB7	5	0.052078	0.13992	1	464	4	-0.52265	0.89566	0.90946	1	2833	0	-0.52265
ENTPD1	5	0.052152	0.13992	1	465	3	-0.57197	0.12957	0.29417	1	860	2	-0.57197
SLC17A4	5	0.052189	0.13992	1	466	3	-0.18625	0.81837	0.83267	1	2597	1	-0.18625
AADAC	5	0.052317	0.14053	1	467	2	-0.27736	0.44118	0.61373	1	1843	2	-0.27736
ARSK	5	0.05248	0.14113	1	468	1	-0.045853	0.12217	0.2832	1	812	2	-0.045853
ACSL5	5	0.052575	0.14198	1	469	4	-0.2657	0.96286	0.96881	1	3044	0	-0.2657
ATP6V1B1	5	0.052771	0.14198	1	470	1	0.040409	0.35361	0.53422	1	1627	2	0.040409
MBOAT1	5	0.052908	0.14198	1	471	4	-0.36027	0.88315	0.89776	1	2792	0	-0.36027
SLC22A7	5	0.052947	0.14198	1	472	3	-0.46182	0.29273	0.49478	1	1445	2	-0.46182
KDM6B	5	0.053062	0.14198	1	473	2	0.01456	0.27793	0.48603	1	1406	2	0.01456
RDH14	5	0.053289	0.14199	1	474	2	0.39061	0.017586	0.05962	1	185	3	0.39061
AMDHD1	5	0.053353	0.14199	1	475	2	0.060072	0.42353	0.60569	1	1804	2	0.060072
KDM2A	5	0.053612	0.14199	1	476	4	-0.45101	0.96612	0.97243	1	3054	0	-0.45101
ACOX1	5	0.053793	0.14199	1	477	3	-0.44049	0.23105	0.44525	1	1282	2	-0.44049
GFOD2	5	0.054152	0.14256	1	478	3	-0.50166	0.97943	0.98478	1	3097	0	-0.50166
ATP6V0E1	5	0.054225	0.14256	1	479	2	0.040807	0.29468	0.49479	1	1451	2	0.040807
AKR1C4	5	0.054459	0.14256	1	480	4	-0.29571	0.56035	0.72022	1	2152	1	-0.29571
LYZL6	5	0.054496	0.14256	1	481	2	-0.15814	0.86227	0.87761	1	2715	1	-0.15814
GCAT	5	0.054806	0.14256	1	482	2	0.19324	0.060455	0.16039	1	480	3	0.19324
HACD1	5	0.054903	0.14256	1	483	4	-0.48255	0.25823	0.462	1	1355	1	-0.48255
KDM4B	5	0.054952	0.14256	1	484	3	-0.41871	0.61601	0.74432	1	2231	1	-0.41871
MAOA	5	0.055386	0.14256	1	485	1	0.082137	0.49673	0.6736	1	2016	2	0.082137
ADH1C	5	0.055554	0.14256	1	486	3	-0.33788	0.52233	0.70286	1	2088	2	-0.33788
MGAT4A	5	0.05579	0.14256	1	487	3	-0.28732	0.0053935	0.020421	1	67	2	-0.28732
PNMT	5	0.056173	0.14256	1	488	2	-0.048635	0.72415	0.7801	1	2413	1	-0.048635
DUOX2	5	0.056257	0.14256	1	489	1	0.079244	0.088167	0.22309	1	622	2	0.079244
NOX4	5	0.056327	0.14256	1	490	3	-0.43688	0.87076	0.88464	1	2744	0	-0.43688
SLC25A52	5	0.056547	0.14256	1	491	3	-0.24973	0.95962	0.96578	1	3030	0	-0.24973
NME7	5	0.056837	0.14256	1	492	3	-0.27004	0.018244	0.065934	1	197	2	-0.27004
UMPS	5	0.056948	0.14256	1	493	4	-0.47337	0.67315	0.75707	1	2324	1	-0.47337
UROC1	5	0.057019	0.14256	1	494	4	-0.25685	0.25223	0.45816	1	1341	1	-0.25685
PIP5KL1	5	0.057124	0.14307	1	495	4	-0.44948	0.57525	0.73017	1	2177	1	-0.44948
PPAPDC2	5	0.057335	0.14307	1	496	4	-0.28199	0.61742	0.74432	1	2233	1	-0.28199
SLC35F4	5	0.057416	0.14307	1	497	1	0.167	0.42799	0.60899	1	1815	2	0.167
PLA2G5	5	0.057476	0.14307	1	498	4	-0.27121	0.44616	0.61837	1	1857	1	-0.27121
SLC51B	5	0.05776	0.14307	1	499	4	-0.27472	0.98801	0.99115	1	3127	0	-0.27472
PMM1	5	0.057795	0.14307	1	500	4	-0.23184	0.98921	0.99299	1	3130	0	-0.23184
ATP5F1B	5	0.05783	0.14307	1	501	4	-0.46654	0.80854	0.82846	1	2570	1	-0.46654
VDAC1	5	0.05814	0.14307	1	502	3	-0.32969	0.25751	0.462	1	1352	2	-0.32969
ETNK2	5	0.058514	0.14307	1	503	3	-0.37988	0.22611	0.44271	1	1271	1	-0.37988
DHCR24	5	0.058575	0.14307	1	504	2	-0.066771	0.066492	0.18371	1	507	2	-0.066771
CA7	5	0.058794	0.1436	1	505	4	-0.25856	0.86493	0.87901	1	2726	0	-0.25856
FUT5	5	0.058864	0.1436	1	506	3	-0.39751	0.099354	0.2358	1	683	2	-0.39751
GALNT16	5	0.058883	0.1436	1	507	2	0.2827	0.09963	0.23661	1	686	3	0.2827
COX7B	5	0.058938	0.1436	1	508	4	-0.44127	0.79651	0.81981	1	2544	1	-0.44127
DGKQ	5	0.059045	0.1436	1	509	4	-0.37374	0.99147	0.99405	1	3134	0	-0.37374
MGAT4B	5	0.059118	0.14429	1	510	3	-0.27342	0.9598	0.96632	1	3031	0	-0.27342
ACADSB	5	0.059153	0.14429	1	511	4	-0.33996	0.071815	0.19126	1	532	1	-0.33996
MAT2B	5	0.059353	0.14429	1	512	2	0.31583	0.083723	0.21904	1	601	3	0.31583
SLC14A2	5	0.059369	0.14429	1	513	4	-0.3097	0.93759	0.94477	1	2957	0	-0.3097
NEU1	5	0.059386	0.14429	1	514	3	-0.40896	0.88944	0.90492	1	2811	0	-0.40896
PFKL	5	0.059443	0.14429	1	515	2	-0.0631	0.61318	0.74301	1	2228	1	-0.0631
AASDH	5	0.059599	0.14491	1	516	3	-0.38973	0.33093	0.52081	1	1555	2	-0.38973
SLC5A8	5	0.059746	0.14491	1	517	3	-0.27326	0.10565	0.25285	1	724	1	-0.27326
GLT8D2	5	0.059903	0.14491	1	518	4	-0.32517	0.88298	0.89776	1	2791	0	-0.32517
SLC29A2	5	0.06017	0.14491	1	519	3	-0.42761	0.89131	0.90493	1	2817	0	-0.42761
ALAD	5	0.060297	0.14491	1	520	2	-0.13661	0.94744	0.95352	1	2989	0	-0.13661
PLIN3	5	0.06031	0.14491	1	521	2	0.19624	0.097646	0.2338	1	675	3	0.19624
SLC25A41	5	0.060423	0.14491	1	522	4	-0.32062	0.1479	0.31486	1	950	1	-0.32062
SLC28A1	5	0.060456	0.14491	1	523	3	-0.57125	0.27317	0.4797	1	1394	1	-0.57125
COX6C	5	0.060599	0.14491	1	524	3	-0.31492	0.96205	0.96832	1	3040	0	-0.31492
NAT10	5	0.060744	0.14491	1	525	3	-0.46871	0.70027	0.76995	1	2371	1	-0.46871
GAL3ST2	5	0.060789	0.14491	1	526	4	-0.31175	0.97232	0.97687	1	3076	0	-0.31175
P4HTM	5	0.061088	0.14491	1	527	4	-0.31854	0.77966	0.81265	1	2505	1	-0.31854
PLCH2	5	0.061128	0.14491	1	528	3	-0.67792	0.77269	0.8071	1	2489	1	-0.67792
NDUFAF2	5	0.061157	0.14491	1	529	4	-0.23866	0.30598	0.50335	1	1489	1	-0.23866
GABRB1	5	0.061167	0.14491	1	530	2	-0.079213	0.88249	0.89776	1	2788	0	-0.079213
HSD17B1	5	0.061224	0.14985	1	531	3	-0.42751	0.59198	0.73868	1	2206	1	-0.42751
CROT	5	0.061466	0.14986	1	532	2	0.30641	0.12697	0.29247	1	843	3	0.30641
UPP1	5	0.061563	0.14986	1	533	4	-0.23505	0.77324	0.8071	1	2492	1	-0.23505
SLC1A3	5	0.061755	0.15047	1	534	2	-0.12269	0.67489	0.75854	1	2326	1	-0.12269
KCTD15	5	0.061971	0.15101	1	535	4	-0.25783	0.98268	0.9863	1	3110	0	-0.25783
CYTB	5	0.062332	0.15224	1	536	3	-0.27112	0.69992	0.76995	1	2370	1	-0.27112
LSS	5	0.062381	0.15224	1	537	4	-0.34564	0.15827	0.32595	1	996	1	-0.34564
GALNT6	5	0.062418	0.15225	1	538	4	-0.48569	0.94273	0.94714	1	2977	0	-0.48569
XYLT1	5	0.062493	0.15225	1	539	4	-0.16931	0.50207	0.67658	1	2033	1	-0.16931
PRDX1	5	0.062522	0.15225	1	540	2	-0.055443	0.70292	0.76996	1	2377	1	-0.055443
DDHD2	5	0.062602	0.15225	1	541	2	0.0046949	0.64821	0.75135	1	2277	1	0.0046949
CERS3	5	0.06262	0.15225	1	542	2	-0.18557	0.46942	0.63568	1	1934	2	-0.18557
FUT1	5	0.062682	0.15274	1	543	3	-0.2252	0.8624	0.87761	1	2716	1	-0.2252
CYP39A1	5	0.062824	0.15274	1	544	3	-0.38792	0.94455	0.94938	1	2982	0	-0.38792
ANKH	5	0.062971	0.15274	1	545	3	-0.43234	0.21345	0.43249	1	1237	2	-0.43234
ABCA4	5	0.063069	0.15274	1	546	3	-0.50801	0.39712	0.58203	1	1738	2	-0.50801
GAL3ST1	5	0.063197	0.15274	1	547	4	-0.43194	0.90942	0.92431	1	2871	0	-0.43194
CYP4F22	5	0.063461	0.1535	1	548	3	-0.42019	0.83474	0.84708	1	2642	1	-0.42019
KCNJ8	5	0.063508	0.1535	1	549	4	-0.3775	0.30052	0.49827	1	1468	1	-0.3775
MLXIPL	5	0.063707	0.15478	1	550	3	-0.29002	0.82607	0.83565	1	2618	1	-0.29002
GCDH	5	0.063889	0.15532	1	551	3	-0.18762	0.41618	0.59787	1	1786	1	-0.18762
PNPLA1	5	0.064062	0.15532	1	552	2	0.0063106	0.35947	0.54067	1	1649	2	0.0063106
AMY1A	5	0.064114	0.15532	1	553	4	-0.23147	0.88271	0.89776	1	2789	0	-0.23147
SLC25A13	5	0.06435	0.15532	1	554	2	-0.11467	0.87531	0.89004	1	2757	0	-0.11467
SLC9A3	5	0.064398	0.15532	1	555	3	-0.44586	0.40162	0.5869	1	1745	1	-0.44586
KCNC1	5	0.064725	0.1574	1	556	4	-0.29638	0.2474	0.45695	1	1329	1	-0.29638
GALNT9	5	0.064779	0.1574	1	557	3	-0.36917	0.39367	0.58202	1	1732	2	-0.36917
LAP3	5	0.064926	0.1574	1	558	2	0.22556	0.096577	0.23301	1	671	3	0.22556
TREH	5	0.065012	0.1574	1	559	4	-0.358	0.79617	0.81981	1	2543	1	-0.358
DNMT1	5	0.065012	0.1574	1	560	4	-0.25669	0.98135	0.98604	1	3106	0	-0.25669
CDS1	5	0.065214	0.1574	1	561	3	-0.1843	0.16802	0.35115	1	1054	2	-0.1843
TYMS	5	0.065224	0.1574	1	562	4	-0.16893	0.97137	0.97608	1	3072	0	-0.16893
PLA2G2F	5	0.065436	0.1574	1	563	4	-0.35735	0.94818	0.95414	1	2993	0	-0.35735
CA5A	5	0.065789	0.15822	1	564	2	-0.1023	0.92318	0.93263	1	2911	0	-0.1023
ALPL	5	0.065837	0.15822	1	565	3	-0.19228	0.3168	0.51108	1	1523	2	-0.19228
NUDT8	5	0.065844	0.15822	1	566	3	-0.44507	0.96436	0.97069	1	3046	0	-0.44507
ADHFE1	5	0.066077	0.15822	1	567	2	-0.010557	0.40262	0.5869	1	1748	2	-0.010557
FKRP	5	0.066082	0.15822	1	568	2	-0.011584	0.22388	0.44271	1	1266	2	-0.011584
ENTPD7	5	0.066095	0.15822	1	569	4	-0.37895	0.96269	0.96832	1	3043	0	-0.37895
SLCO1A2	5	0.066113	0.15822	1	570	4	-0.31144	0.96151	0.96779	1	3039	0	-0.31144
GSTM4	5	0.066424	0.15906	1	571	4	-0.31176	0.65823	0.75276	1	2294	1	-0.31176
SLC6A15	5	0.066652	0.15906	1	572	2	-0.021402	0.15378	0.32234	1	982	2	-0.021402
AHCYL1	5	0.066697	0.15955	1	573	4	-0.26092	0.78513	0.8141	1	2519	1	-0.26092
NUDT19	5	0.066893	0.16077	1	574	4	-0.25725	0.75101	0.79021	1	2455	1	-0.25725
MECOM	5	0.067514	0.16077	1	575	2	-0.13356	0.30532	0.50335	1	1487	2	-0.13356
GNPNAT1	5	0.067612	0.16077	1	576	3	-0.39336	0.81984	0.83267	1	2601	1	-0.39336
GSTP1	5	0.067726	0.16145	1	577	2	0.061041	0.64211	0.75135	1	2261	1	0.061041
COX10	5	0.067801	0.16145	1	578	2	-0.1617	0.050442	0.1466	1	427	1	-0.1617
KCNQ2	5	0.067809	0.16145	1	579	3	-0.28672	0.41067	0.59098	1	1767	2	-0.28672
ASIC5	5	0.068376	0.16145	1	580	1	0.24934	0.18774	0.38938	1	1146	3	0.24934
SLC9A5	5	0.068531	0.16307	1	581	3	-0.32167	0.83724	0.84838	1	2650	1	-0.32167
ABCA1	5	0.068869	0.16359	1	582	4	-0.2032	0.94934	0.95544	1	2997	0	-0.2032
KEAP1	5	0.068949	0.16359	1	583	4	-0.37162	0.018544	0.06808	1	200	1	-0.37162
NUDT11	5	0.06895	0.16359	1	584	3	-0.21401	0.85633	0.87191	1	2693	1	-0.21401
THNSL2	5	0.069029	0.16359	1	585	4	-0.30064	0.97827	0.98393	1	3092	0	-0.30064
SEPHS1	5	0.069097	0.16359	1	586	3	-0.35643	0.31562	0.50864	1	1521	2	-0.35643
AKR1B1	5	0.069136	0.16359	1	587	3	-0.24568	0.16723	0.35004	1	1051	2	-0.24568
CERS6	5	0.069236	0.16359	1	588	2	-0.017103	0.070097	0.18889	1	524	1	-0.017103
ACSF2	5	0.069469	0.16359	1	589	2	-0.25258	0.4971	0.6736	1	2017	2	-0.25258
C1GALT1	5	0.069523	0.16359	1	590	2	0.33529	0.016666	0.056033	1	176	3	0.33529
FMO5	5	0.069636	0.16412	1	591	2	0.37746	0.014532	0.047639	1	156	3	0.37746
PKD2	5	0.06981	0.16412	1	592	3	-0.47331	0.31276	0.50864	1	1512	2	-0.47331
PAPSS2	5	0.070033	0.16412	1	593	4	-0.31228	0.73303	0.78444	1	2427	1	-0.31228
ARG1	5	0.070097	0.16412	1	594	1	-0.07028	0.73514	0.786	1	2431	1	-0.07028
PLIN1	5	0.070316	0.16474	1	595	4	-0.22973	0.62023	0.74574	1	2235	1	-0.22973
ECHDC2	5	0.070391	0.16973	1	596	3	-0.29396	0.043426	0.14218	1	391	1	-0.29396
GLUD1	5	0.070438	0.16973	1	597	4	-0.20769	0.066364	0.18371	1	505	1	-0.20769
SLC4A1	5	0.070762	0.16973	1	598	4	-0.42288	0.68175	0.76289	1	2335	1	-0.42288
STT3B	5	0.070844	0.16973	1	599	4	-0.29439	0.66373	0.75416	1	2309	1	-0.29439
CMPK1	5	0.07086	0.16973	1	600	3	-0.43086	0.64557	0.75135	1	2271	1	-0.43086
HILPDA	5	0.070956	0.16973	1	601	1	0.15811	0.85774	0.87472	1	2697	1	0.15811
MAN2B1	5	0.070966	0.16973	1	602	4	-0.25366	0.96862	0.9749	1	3061	0	-0.25366
HSD17B13	5	0.071227	0.17047	1	603	3	-0.3222	0.87708	0.89269	1	2765	0	-0.3222
OAS2	5	0.071397	0.17047	1	604	3	-0.22076	0.33146	0.52081	1	1558	1	-0.22076
HIF3A	5	0.071529	0.17047	1	605	2	0.04106	0.46072	0.62906	1	1906	2	0.04106
HACD3	5	0.072101	0.17128	1	606	2	0.51823	0.001973	0.0085517	1	27	3	0.51823
KL	5	0.072326	0.17128	1	607	2	-0.18378	0.52678	0.70733	1	2103	1	-0.18378
DDOST	5	0.072387	0.17128	1	608	1	0.42407	0.02762	0.088139	1	262	3	0.42407
SLC7A4	5	0.072543	0.17128	1	609	3	-0.47566	0.91322	0.92726	1	2881	0	-0.47566
GRHPR	5	0.072649	0.17128	1	610	3	-0.30152	0.79248	0.81698	1	2534	1	-0.30152
ACSL4	5	0.073245	0.17582	1	611	3	-0.32426	0.3812	0.5644	1	1706	1	-0.32426
SLC16A11	5	0.073392	0.17582	1	612	3	-0.4259	0.37183	0.55886	1	1677	2	-0.4259
DCTPP1	5	0.073772	0.17652	1	613	3	-0.20909	0.58028	0.73153	1	2184	1	-0.20909
MANBA	5	0.073817	0.17652	1	614	1	0.33484	0.046041	0.14281	1	405	3	0.33484
LGSN	5	0.074388	0.17715	1	615	1	0.1886	0.80561	0.827	1	2561	1	0.1886
PNPO	5	0.074408	0.17715	1	616	3	-0.53289	0.9602	0.96632	1	3034	0	-0.53289
KCNA6	5	0.074838	0.17715	1	617	3	-0.27762	0.89365	0.90832	1	2827	0	-0.27762
HGD	5	0.075228	0.17715	1	618	2	0.049607	0.41385	0.59574	1	1778	2	0.049607
APEH	5	0.075244	0.17715	1	619	3	-0.34164	0.46788	0.63382	1	1931	2	-0.34164
PIGW	5	0.0754	0.17786	1	620	3	-0.21803	0.44007	0.61373	1	1841	1	-0.21803
SLC8A2	5	0.07553	0.17786	1	621	2	0.023866	0.086621	0.22309	1	614	2	0.023866
SLC17A9	5	0.0761	0.17856	1	622	1	0.22629	0.08281	0.21633	1	594	3	0.22629
STARD3	5	0.076435	0.17856	1	623	3	-0.49742	0.8193	0.83267	1	2600	1	-0.49742
MBOAT4	5	0.07649	0.17856	1	624	3	-0.43891	0.17246	0.36223	1	1072	1	-0.43891
DIRC2	5	0.076522	0.17856	1	625	2	0.24063	0.10184	0.24016	1	704	3	0.24063
CHKB	5	0.076681	0.17856	1	626	3	-0.60601	0.28672	0.49106	1	1428	1	-0.60601
MTTP	5	0.076868	0.17856	1	627	2	-0.19569	0.26395	0.46697	1	1368	2	-0.19569
LRTOMT	5	0.077227	0.17856	1	628	3	-0.3182	0.55306	0.71877	1	2142	1	-0.3182
TPK1	5	0.077525	0.17856	1	629	3	-0.34797	0.3927	0.578	1	1730	1	-0.34797
ACSL1	5	0.077611	0.17856	1	630	3	-0.36138	0.68934	0.76855	1	2349	1	-0.36138
CYP51A1	5	0.07781	0.17856	1	631	1	0.16336	0.038217	0.11567	1	352	4	0.16336
ATP5MC1	5	0.077824	0.17856	1	632	3	-0.36148	0.96686	0.97406	1	3057	0	-0.36148
DGAT2	5	0.078379	0.17856	1	633	2	-0.012946	0.10943	0.26277	1	753	2	-0.012946
PLA1A	5	0.078382	0.17856	1	634	3	-0.47734	0.24303	0.45695	1	1317	2	-0.47734
LEPREL1	5	0.078493	0.17856	1	635	3	-0.37051	0.066939	0.18372	1	510	2	-0.37051
SCNN1G	5	0.078548	0.17856	1	636	3	-0.38221	0.25319	0.46075	1	1343	1	-0.38221
GALNT10	5	0.078609	0.17927	1	637	2	-0.10586	0.34499	0.52967	1	1597	2	-0.10586
B3GNT3	5	0.078664	0.17927	1	638	2	0.31532	0.045222	0.14281	1	401	3	0.31532
PMM2	5	0.078696	0.17927	1	639	3	-0.17173	0.26893	0.47067	1	1384	2	-0.17173
MARS2	5	0.078948	0.17927	1	640	2	-0.073797	0.1706	0.35998	1	1063	2	-0.073797
SLC22A9	5	0.079157	0.17927	1	641	3	-0.35597	0.94123	0.94633	1	2967	0	-0.35597
SLC17A8	5	0.079233	0.17927	1	642	1	-0.034395	0.027489	0.087596	1	260	1	-0.034395
CYP4A11	5	0.079324	0.17927	1	643	3	-0.42636	0.52812	0.70733	1	2108	1	-0.42636
MAN1B1	5	0.079658	0.17927	1	644	3	-0.63595	0.44257	0.61688	1	1848	2	-0.63595
MFSD8	5	0.079801	0.17927	1	645	2	0.031209	0.6366	0.75135	1	2254	1	0.031209
ST8SIA4	5	0.0801	0.18005	1	646	2	0.12178	0.058864	0.15867	1	472	2	0.12178
CYP4Z1	5	0.080364	0.18005	1	647	3	-0.30915	0.58721	0.73438	1	2193	1	-0.30915
RAB18	5	0.080608	0.18476	1	648	3	-0.6146	0.72642	0.7801	1	2418	1	-0.6146
CYB5R1	5	0.080654	0.18476	1	649	1	0.094363	0.079222	0.20968	1	574	2	0.094363
SLC32A1	5	0.080805	0.18476	1	650	2	0.024178	0.4372	0.61234	1	1834	1	0.024178
ATP6AP1	5	0.081226	0.18476	1	651	3	-0.53117	0.66966	0.7556	1	2317	1	-0.53117
DDT	5	0.081395	0.18535	1	652	3	-0.39872	0.82007	0.83267	1	2602	1	-0.39872
ACP1	5	0.081451	0.18535	1	653	3	-0.46971	0.62107	0.74574	1	2238	1	-0.46971
SLC7A2	5	0.081602	0.18535	1	654	3	-0.73615	0.98518	0.98805	1	3120	0	-0.73615
SLC46A2	5	0.081789	0.18535	1	655	3	-0.34653	0.032538	0.1009	1	300	2	-0.34653
NDUFB5	5	0.082129	0.18535	1	656	3	-0.36136	0.23312	0.44788	1	1288	2	-0.36136
ARSB	5	0.082134	0.18535	1	657	2	0.010438	0.65926	0.75276	1	2297	1	0.010438
COX16	5	0.082579	0.18693	1	658	2	-0.062509	0.66335	0.75416	1	2308	1	-0.062509
CFTR	5	0.082846	0.18776	1	659	3	-0.24217	0.37476	0.55886	1	1683	1	-0.24217
RFNG	5	0.082923	0.18776	1	660	3	-0.285	0.96814	0.9749	1	3060	0	-0.285
EPX	5	0.08349	0.18776	1	661	1	0.13772	0.13688	0.30307	1	899	3	0.13772
PLCG2	5	0.083774	0.18776	1	662	3	-0.25273	0.51417	0.69521	1	2070	2	-0.25273
ABCA9	5	0.08401	0.18776	1	663	3	-0.41795	0.84167	0.8525	1	2657	1	-0.41795
GMPR	5	0.084067	0.18776	1	664	3	-0.32489	0.17325	0.36364	1	1078	1	-0.32489
ABCC8	5	0.084124	0.18776	1	665	3	-0.43954	0.13526	0.30074	1	892	1	-0.43954
CYC1	5	0.08434	0.18849	1	666	1	0.23134	0.14929	0.31786	1	956	3	0.23134
PYCR1	5	0.084367	0.1885	1	667	2	0.055772	0.83322	0.84564	1	2635	1	0.055772
CLCNKA	5	0.084457	0.1885	1	668	3	-0.41539	0.36616	0.54929	1	1660	2	-0.41539
ADIPOR2	5	0.084816	0.18918	1	669	2	-0.08316	0.057416	0.15615	1	466	1	-0.08316
ABCA7	5	0.085041	0.18918	1	670	3	-0.27054	0.93993	0.94548	1	2965	0	-0.27054
GCR	5	0.085041	0.18918	1	671	2	0.048101	0.82061	0.83267	1	2604	1	0.048101
SLC10A1	5	0.085045	0.18918	1	672	3	-0.33377	0.71946	0.7801	1	2405	1	-0.33377
ADCY6	5	0.085176	0.18918	1	673	2	-0.16822	0.88981	0.90492	1	2812	0	-0.16822
LPO	5	0.085189	0.18918	1	674	3	-0.20883	0.1487	0.31644	1	953	1	-0.20883
MGAT2	5	0.085971	0.18919	1	675	3	-0.5456	0.51922	0.70134	1	2077	1	-0.5456
MTMR1	5	0.086169	0.18988	1	676	2	0.35093	0.060744	0.16471	1	481	3	0.35093
PLCH1	5	0.08632	0.18988	1	677	2	0.00851	0.87023	0.8832	1	2741	0	0.00851
TP53I3	5	0.08644	0.18988	1	678	3	-0.46198	0.50252	0.67658	1	2035	2	-0.46198
PRDM2	5	0.086495	0.18988	1	679	3	-0.36701	0.02511	0.08383	1	248	2	-0.36701
ATP5F1A	5	0.086603	0.18988	1	680	2	-0.046659	0.87911	0.89525	1	2775	0	-0.046659
DPYS	5	0.087166	0.18988	1	681	2	0.23251	0.065837	0.18371	1	502	3	0.23251
PLA2G2A	5	0.08745	0.19148	1	682	1	0.23534	0.036959	0.11298	1	338	2	0.23534
LOXL3	5	0.087957	0.19398	1	683	3	-0.41492	0.32438	0.51683	1	1539	2	-0.41492
PC	5	0.088076	0.19398	1	684	2	-0.23649	0.91838	0.931	1	2891	0	-0.23649
SLC9A6	5	0.088134	0.19398	1	685	3	-0.29722	0.79438	0.81698	1	2540	1	-0.29722
CHKA	5	0.088579	0.19488	1	686	2	-0.11353	0.1661	0.35004	1	1041	2	-0.11353
SLC20A1	5	0.088782	0.19488	1	687	3	-0.364	0.69864	0.76995	1	2368	1	-0.364
DPYSL3	5	0.088841	0.19488	1	688	3	-0.30226	0.14723	0.31486	1	945	2	-0.30226
MSRA	5	0.08896	0.19488	1	689	3	-0.34272	0.56878	0.72591	1	2166	1	-0.34272
SLC25A10	5	0.089172	0.19489	1	690	2	-0.19304	0.76161	0.79849	1	2471	1	-0.19304
HS3ST4	5	0.089425	0.19489	1	691	1	0.00077174	0.62966	0.75	1	2245	1	0.00077174
SLC6A13	5	0.089611	0.19568	1	692	3	-0.39475	0.78308	0.81409	1	2512	1	-0.39475
AGMAT	5	0.089706	0.19568	1	693	2	0.047887	0.25041	0.45695	1	1336	2	0.047887
LIPA	5	0.089722	0.19568	1	694	3	-0.40874	0.081957	0.21632	1	588	2	-0.40874
PAH	5	0.08986	0.19568	1	695	2	-0.1763	0.33278	0.52081	1	1560	1	-0.1763
GPAM	5	0.089988	0.19568	1	696	2	0.0030603	0.071529	0.19001	1	531	1	0.0030603
BCS1L	5	0.090266	0.19568	1	697	3	-0.31209	0.32881	0.51812	1	1549	2	-0.31209
LCT	5	0.09027	0.19568	1	698	3	-0.37233	0.83503	0.84708	1	2644	1	-0.37233
PDE4A	5	0.090551	0.19568	1	699	2	-0.1456	0.75929	0.79581	1	2467	1	-0.1456
OLAH	5	0.090683	0.19568	1	700	3	-0.57841	0.56349	0.72306	1	2158	1	-0.57841
PAFAH1B2	5	0.090863	0.19655	1	701	3	-0.27623	0.50068	0.6751	1	2026	1	-0.27623
CATSPERB	5	0.091342	0.19745	1	702	3	-0.27547	0.10371	0.25159	1	713	2	-0.27547
MANEAL	5	0.091402	0.19745	1	703	3	-0.37561	0.87657	0.89269	1	2764	0	-0.37561
KMT5A	5	0.091657	0.19745	1	704	3	-0.33883	0.93034	0.94073	1	2935	0	-0.33883
HYI	5	0.091677	0.19745	1	705	2	0.03957	0.48385	0.65261	1	1979	2	0.03957
HS6ST2	5	0.091762	0.19745	1	706	3	-0.27691	0.26775	0.46943	1	1381	1	-0.27691
KCTD21	5	0.091943	0.19745	1	707	3	-0.54561	0.91606	0.93006	1	2887	0	-0.54561
SUMF1	5	0.091958	0.19745	1	708	3	-0.25418	0.604	0.74153	1	2215	1	-0.25418
FDX1L	5	0.092184	0.19745	1	709	3	-0.54469	0.15774	0.32595	1	992	2	-0.54469
SLC39A10	5	0.092485	0.19833	1	710	3	-0.38892	0.41459	0.59575	1	1781	2	-0.38892
GALNT7	5	0.092606	0.19833	1	711	3	-0.54141	0.37856	0.56297	1	1694	2	-0.54141
GMPPB	5	0.09277	0.19834	1	712	2	-0.19601	0.75211	0.79021	1	2457	1	-0.19601
UGT1A9	5	0.092848	0.19834	1	713	3	-0.41169	0.75695	0.79436	1	2464	1	-0.41169
GALNTL6	5	0.093083	0.19916	1	714	3	-0.44174	0.034081	0.10731	1	311	2	-0.44174
ALDH9A1	5	0.093364	0.19916	1	715	1	0.13854	0.289	0.49106	1	1438	2	0.13854
CA4	5	0.093644	0.19916	1	716	3	-0.38594	0.94145	0.94633	1	2968	0	-0.38594
GGTLC2	5	0.094448	0.19916	1	717	3	-0.29269	0.58285	0.733	1	2189	1	-0.29269
GPX6	5	0.094767	0.19916	1	718	2	0.0057531	0.75031	0.79021	1	2453	1	0.0057531
CYP11A1	5	0.095048	0.19916	1	719	2	-0.22961	0.27881	0.48603	1	1409	2	-0.22961
PNPLA7	5	0.09529	0.19916	1	720	3	-0.4197	0.72208	0.7801	1	2410	1	-0.4197
NT5DC2	5	0.095328	0.19916	1	721	1	0.25658	0.1269	0.29247	1	842	3	0.25658
SLC3A1	5	0.095478	0.2	1	722	3	-0.3017	0.17793	0.37806	1	1104	1	-0.3017
MPC2	5	0.095592	0.20001	1	723	3	-0.39567	0.65836	0.75276	1	2295	1	-0.39567
TM7SF2	5	0.09576	0.20163	1	724	3	-0.63757	0.70965	0.77295	1	2389	1	-0.63757
GDPD4	5	0.095889	0.20163	1	725	3	-0.24494	0.75409	0.79153	1	2460	1	-0.24494
NR1H3	5	0.09623	0.20163	1	726	2	0.061493	0.50203	0.67658	1	2032	2	0.061493
STAR	5	0.096701	0.20239	1	727	3	-0.47189	0.84285	0.85538	1	2662	1	-0.47189
FOLR1	5	0.096887	0.20325	1	728	3	-0.25462	0.1076	0.2592	1	737	1	-0.25462
CTBP1	5	0.097009	0.20325	1	729	3	-0.24162	0.22475	0.44271	1	1269	2	-0.24162
SV2C	5	0.097258	0.20426	1	730	3	-0.44952	0.98527	0.98823	1	3121	0	-0.44952
CHRNA2	5	0.097289	0.20426	1	731	3	-0.443	0.068088	0.18372	1	514	1	-0.443
GSTT2B	5	0.097569	0.20426	1	732	2	0.14298	0.71089	0.77441	1	2392	1	0.14298
GLRX3	5	0.098004	0.20859	1	733	3	-0.39042	0.77334	0.8071	1	2493	1	-0.39042
CRYZL1	5	0.098119	0.20859	1	734	3	-0.28215	0.95496	0.96156	1	3015	0	-0.28215
CYP11B1	5	0.098408	0.20859	1	735	2	0.13501	0.38996	0.57507	1	1728	2	0.13501
KCNQ4	5	0.098628	0.20859	1	736	3	-0.42394	0.16276	0.33501	1	1029	1	-0.42394
RHBG	5	0.098688	0.20859	1	737	2	0.16547	0.035464	0.10887	1	321	2	0.16547
EXTL1	5	0.098967	0.21023	1	738	1	0.17192	0.1633	0.33913	1	1032	2	0.17192
NOXRED1	5	0.099003	0.21024	1	739	3	-0.48882	0.1012	0.23883	1	701	2	-0.48882
AGL	5	0.099128	0.21115	1	740	3	-0.52387	0.40923	0.59098	1	1763	1	-0.52387
ATP6V1G2	5	0.099164	0.21115	1	741	3	-0.25661	0.32327	0.51561	1	1536	1	-0.25661
H6PD	5	0.099247	0.21115	1	742	1	0.13534	0.21202	0.43118	1	1233	2	0.13534
MARC1	5	0.099545	0.21296	1	743	2	-0.079032	0.29203	0.49478	1	1444	2	-0.079032
SLC30A2	5	0.099805	0.21296	1	744	2	0.13982	0.35767	0.53928	1	1641	2	0.13982
CYP4X1	5	0.10007	0.21381	1	745	3	-0.54388	0.0501	0.14605	1	425	2	-0.54388
LFNG	5	0.1002	0.21381	1	746	3	-0.50818	0.3368	0.52081	1	1575	2	-0.50818
KCNQ1	5	0.10045	0.21381	1	747	3	-0.28625	0.4393	0.61373	1	1840	1	-0.28625
CHRNG	5	0.1005	0.21381	1	748	2	0.39284	0.03229	0.10026	1	297	3	0.39284
CYP2B6	5	0.10057	0.21381	1	749	3	-0.4017	0.42208	0.60414	1	1800	2	-0.4017
CERKL	5	0.10089	0.21381	1	750	3	-0.47421	0.47163	0.64134	1	1940	2	-0.47421
ASNS	5	0.10126	0.21382	1	751	2	-0.0036222	0.78734	0.81698	1	2524	1	-0.0036222
SLC18A2	5	0.10148	0.21382	1	752	1	0.0089651	0.34026	0.52828	1	1584	2	0.0089651
DPYD	5	0.10176	0.21382	1	753	1	0.47008	0.03219	0.10026	1	294	3	0.47008
GPLD1	5	0.10204	0.21473	1	754	1	0.10866	0.45972	0.62906	1	1901	2	0.10866
CLC	5	0.10222	0.21473	1	755	3	-0.23704	0.8968	0.91167	1	2836	0	-0.23704
GBGT1	5	0.1028	0.21566	1	756	3	-0.34245	0.46502	0.6324	1	1919	1	-0.34245
FMO1	5	0.10287	0.21566	1	757	3	-0.27387	0.16644	0.35004	1	1044	1	-0.27387
TRPM5	5	0.10319	0.21566	1	758	2	-0.093853	0.12793	0.29417	1	852	2	-0.093853
LARGE1	5	0.10344	0.21651	1	759	3	-0.45582	0.95132	0.95671	1	3003	0	-0.45582
CRYM	5	0.10426	0.21846	1	760	2	-0.11173	0.61332	0.74301	1	2229	1	-0.11173
MOGS	5	0.10427	0.21846	1	761	3	-0.34173	0.55529	0.71877	1	2145	1	-0.34173
ISYNA1	5	0.10453	0.21846	1	762	3	-0.37803	0.030906	0.095967	1	288	2	-0.37803
GK5	5	0.10454	0.21846	1	763	2	-0.082436	0.86065	0.87611	1	2707	1	-0.082436
TET3	5	0.10466	0.21846	1	764	3	-0.50277	0.66576	0.7556	1	2311	1	-0.50277
NDUFB8	5	0.10479	0.21846	1	765	3	-0.28925	0.47143	0.63992	1	1939	1	-0.28925
SLC39A3	5	0.10482	0.21846	1	766	2	-0.17069	0.20714	0.42715	1	1218	2	-0.17069
HSD3B1	5	0.10483	0.21846	1	767	2	-0.10011	0.88488	0.90017	1	2796	0	-0.10011
STARD3NL	5	0.10512	0.21846	1	768	2	0.32485	0.072279	0.19255	1	536	3	0.32485
PDK2	5	0.10522	0.21846	1	769	2	-0.079603	0.85504	0.87056	1	2688	1	-0.079603
SLC2A5	5	0.10546	0.21846	1	770	3	-0.40935	0.36536	0.54929	1	1659	2	-0.40935
LDHAL6B	5	0.10551	0.21846	1	771	3	-0.33671	0.84851	0.858	1	2673	1	-0.33671
GLS	5	0.10593	0.21846	1	772	3	-0.39875	0.87583	0.89144	1	2760	0	-0.39875
GALNT1	5	0.106	0.21846	1	773	2	-0.03058	0.16906	0.35864	1	1058	1	-0.03058
PDHA2	5	0.10649	0.21846	1	774	2	0.051133	0.27755	0.48603	1	1405	2	0.051133
ATP6V0A2	5	0.10658	0.21846	1	775	2	0.42367	0.11598	0.27776	1	778	3	0.42367
KCTD8	5	0.10668	0.21846	1	776	2	-0.096919	0.7248	0.7801	1	2415	1	-0.096919
SLC7A6	5	0.10688	0.21846	1	777	3	-0.29911	0.71112	0.77441	1	2393	1	-0.29911
RDH8	5	0.10692	0.21846	1	778	3	-0.32394	0.13431	0.30073	1	884	2	-0.32394
NDOR1	5	0.10704	0.21846	1	779	1	0.089289	0.24499	0.45695	1	1322	2	0.089289
SPNS1	5	0.10756	0.22023	1	780	2	0.16835	0.47271	0.64284	1	1944	2	0.16835
SLCO5A1	5	0.10843	0.22023	1	781	3	-0.38324	0.33673	0.52081	1	1574	1	-0.38324
SETD1A	5	0.10869	0.22023	1	782	3	-0.61968	0.71891	0.7801	1	2404	1	-0.61968
ADO	5	0.10884	0.22023	1	783	2	-0.095509	0.41854	0.59939	1	1792	1	-0.095509
PNPLA4	5	0.10922	0.22023	1	784	3	-0.41503	0.34039	0.52828	1	1585	2	-0.41503
KCNMB3	5	0.10923	0.22023	1	785	2	-0.028369	0.47999	0.65104	1	1963	2	-0.028369
SLCO6A1	5	0.10961	0.22023	1	786	3	-0.37348	0.97958	0.98503	1	3098	0	-0.37348
RRM2	5	0.10981	0.22023	1	787	2	0.13706	0.35082	0.53421	1	1620	2	0.13706
KDM3A	5	0.10982	0.22023	1	788	3	-0.30051	0.052989	0.14661	1	443	2	-0.30051
PGM2	5	0.10992	0.22023	1	789	3	-0.25495	0.36792	0.55232	1	1663	2	-0.25495
SLC13A5	5	0.11009	0.22023	1	790	3	-0.16348	0.91805	0.931	1	2890	0	-0.16348
UQCRC1	5	0.11037	0.22023	1	791	3	-0.27209	0.87159	0.88734	1	2746	0	-0.27209
SRD5A2	5	0.11047	0.22023	1	792	3	-0.31218	0.82831	0.837	1	2623	1	-0.31218
SOAT2	5	0.11064	0.22023	1	793	1	0.0005838	0.28711	0.49106	1	1430	2	0.0005838
SIRT3	5	0.11081	0.22023	1	794	3	-0.395	0.51673	0.69673	1	2075	2	-0.395
FAHD2A	5	0.11081	0.22023	1	795	2	-0.0061826	0.3085	0.50863	1	1498	2	-0.0061826
GUCY2F	5	0.11092	0.22023	1	796	2	-0.088174	0.88012	0.89657	1	2778	0	-0.088174
TMEM104	5	0.11101	0.22023	1	797	2	0.15194	0.16018	0.33028	1	1005	3	0.15194
MOGAT3	5	0.1112	0.22023	1	798	3	-0.26285	0.94781	0.95414	1	2991	0	-0.26285
HPD	5	0.1123	0.22212	1	799	1	-0.035209	0.094767	0.23171	1	659	2	-0.035209
KCNK7	5	0.11234	0.22212	1	800	3	-0.33124	0.90207	0.91919	1	2847	0	-0.33124
PHYH	5	0.11239	0.22212	1	801	3	-0.26638	0.64716	0.75135	1	2274	1	-0.26638
AMY1B	5	0.11247	0.22212	1	802	3	-0.36863	0.088297	0.22309	1	623	2	-0.36863
DHRSX	5	0.11258	0.22212	1	803	1	0.20449	0.14364	0.31264	1	927	3	0.20449
SLC25A40	5	0.11267	0.22302	1	804	3	-0.32122	0.86215	0.87761	1	2714	1	-0.32122
MGAT4C	5	0.11286	0.22302	1	805	2	-0.15655	0.3331	0.52081	1	1561	2	-0.15655
BPHL	5	0.11299	0.22404	1	806	3	-0.3668	0.94233	0.94714	1	2974	0	-0.3668
DBT	5	0.11341	0.22404	1	807	3	-0.20872	0.28888	0.49106	1	1437	2	-0.20872
SLC35C1	5	0.11369	0.22404	1	808	3	-0.28889	0.51624	0.69673	1	2073	2	-0.28889
ATP6V0E2	5	0.11375	0.22404	1	809	3	-0.26706	0.56427	0.72306	1	2160	1	-0.26706
HS3ST5	5	0.11388	0.22404	1	810	3	-0.23257	0.5605	0.72022	1	2153	1	-0.23257
MTFMT	5	0.11409	0.22404	1	811	2	0.31488	0.047278	0.14383	1	413	3	0.31488
NUDT14	5	0.11423	0.22404	1	812	2	0.072643	0.31409	0.50864	1	1515	2	0.072643
STARD7	5	0.11442	0.22404	1	813	3	-0.32229	0.93463	0.94313	1	2946	0	-0.32229
NAA20	5	0.11451	0.22404	1	814	2	-0.17525	0.033416	0.10339	1	308	1	-0.17525
ACAT2	5	0.11479	0.22498	1	815	3	-0.2096	0.51478	0.69672	1	2071	2	-0.2096
ABCB10	5	0.11544	0.22498	1	816	3	-0.2585	0.69065	0.76855	1	2351	1	-0.2585
B3GNT6	5	0.11549	0.22498	1	817	2	0.23377	0.38791	0.57295	1	1722	2	0.23377
IMPA2	5	0.11561	0.22498	1	818	3	-0.20576	0.5902	0.73592	1	2202	1	-0.20576
GAPDHS	5	0.11564	0.22498	1	819	3	-0.32879	0.84223	0.85251	1	2659	1	-0.32879
SLC47A2	5	0.11569	0.22498	1	820	3	-0.22878	0.18143	0.37944	1	1120	2	-0.22878
SLC5A7	5	0.11579	0.226	1	821	3	-0.17299	0.028677	0.090097	1	273	2	-0.17299
GUSB	5	0.11584	0.226	1	822	3	-0.38359	0.2013	0.41916	1	1204	1	-0.38359
AZIN2	5	0.11616	0.22699	1	823	2	-0.018435	0.1893	0.39312	1	1152	1	-0.018435
CYP2U1	5	0.11671	0.22699	1	824	1	0.51781	0.013004	0.045073	1	148	4	0.51781
CYP24A1	5	0.11699	0.22803	1	825	1	-0.15296	0.69701	0.76856	1	2364	1	-0.15296
SLC22A8	5	0.117	0.22803	1	826	3	-0.3634	0.97387	0.97876	1	3083	0	-0.3634
FABP7	5	0.11734	0.22897	1	827	3	-0.43999	0.58089	0.73153	1	2185	1	-0.43999
NDUFA5	5	0.1175	0.22897	1	828	2	0.14981	0.28258	0.48857	1	1420	2	0.14981
RSAD1	5	0.11901	0.23204	1	829	2	-0.086035	0.87041	0.88464	1	2742	0	-0.086035
SLC5A1	5	0.1194	0.23204	1	830	3	-0.37023	0.96445	0.97069	1	3047	0	-0.37023
EPHX2	5	0.11954	0.23204	1	831	3	-0.19603	0.79352	0.81698	1	2538	1	-0.19603
NDUFB10	5	0.12001	0.23309	1	832	3	-0.40586	0.08632	0.22309	1	612	1	-0.40586
GSTT4	5	0.12044	0.23309	1	833	2	-0.34407	0.11359	0.26691	1	768	2	-0.34407
GTDC1	5	0.12084	0.2331	1	834	2	0.13501	0.17142	0.36108	1	1068	2	0.13501
ENPP4	5	0.12092	0.2331	1	835	3	-0.40495	0.90906	0.9243	1	2870	0	-0.40495
DDAH1	5	0.12099	0.2331	1	836	3	-0.41089	0.46243	0.6324	1	1912	1	-0.41089
ATP6V1B2	5	0.12111	0.2331	1	837	1	-0.15795	0.89027	0.90492	1	2813	0	-0.15795
ITGB3	5	0.12115	0.2331	1	838	3	-0.20146	0.23227	0.44788	1	1285	1	-0.20146
ERO1L	5	0.12138	0.23407	1	839	1	0.1762	0.20381	0.42041	1	1213	3	0.1762
SLC6A20	5	0.12156	0.23407	1	840	2	-0.23571	0.34888	0.52967	1	1610	1	-0.23571
NDUFA10	5	0.12165	0.23507	1	841	1	0.00049708	0.88233	0.89657	1	2787	0	0.00049708
TUSC3	5	0.12207	0.23508	1	842	2	-0.099228	0.61161	0.74301	1	2225	1	-0.099228
HKDC1	5	0.12211	0.23508	1	843	3	-0.37417	0.30342	0.50335	1	1483	2	-0.37417
SLC5A5	5	0.12239	0.23615	1	844	3	-0.35152	0.82464	0.83412	1	2613	1	-0.35152
SCARB1	5	0.12247	0.23615	1	845	3	-0.26303	0.092802	0.23171	1	643	2	-0.26303
NME4	5	0.12267	0.23615	1	846	3	-0.38243	0.57892	0.73153	1	2182	1	-0.38243
PNLIP	5	0.12275	0.23615	1	847	1	0.19032	0.18869	0.39185	1	1148	3	0.19032
NUDT21	5	0.12319	0.23729	1	848	2	-0.019891	0.84271	0.85538	1	2661	1	-0.019891
OGFOD2	5	0.1237	0.23729	1	849	2	-0.13335	0.89862	0.9148	1	2840	0	-0.13335
SLC23A1	5	0.12411	0.23729	1	850	2	-0.15696	0.24205	0.45695	1	1312	2	-0.15696
ALOX15B	5	0.12432	0.23729	1	851	2	-0.084488	0.81532	0.83267	1	2588	1	-0.084488
SLC26A8	5	0.12442	0.23729	1	852	2	-0.097364	0.48444	0.65261	1	1981	2	-0.097364
ABCB11	5	0.12493	0.23729	1	853	2	0.21223	0.16759	0.35114	1	1052	3	0.21223
SULT1A4	5	0.12521	0.23729	1	854	3	-0.26738	0.92033	0.931	1	2898	0	-0.26738
SLC12A6	5	0.12541	0.23729	1	855	3	-0.32577	0.39457	0.58202	1	1734	2	-0.32577
SMOX	5	0.12548	0.23729	1	856	3	-0.30741	0.50727	0.68587	1	2051	1	-0.30741
SLC5A2	5	0.12566	0.2384	1	857	2	-0.11935	0.69372	0.76856	1	2357	1	-0.11935
SC5D	5	0.12575	0.2384	1	858	3	-0.20587	0.51344	0.6952	1	2067	1	-0.20587
NAAA	5	0.12576	0.2384	1	859	3	-0.37872	0.81327	0.82984	1	2583	1	-0.37872
GIP	5	0.12607	0.2384	1	860	2	-0.12552	0.3882	0.57507	1	1723	1	-0.12552
MTHFD1	5	0.12657	0.2384	1	861	1	0.10551	0.41666	0.59787	1	1788	2	0.10551
UGT1A10	5	0.12659	0.2384	1	862	2	-0.15654	0.21023	0.42986	1	1228	2	-0.15654
UGT2A2	5	0.12676	0.2384	1	863	3	-0.36479	0.69549	0.76856	1	2362	1	-0.36479
GALC	5	0.12684	0.2384	1	864	3	-0.40779	0.76045	0.79581	1	2469	1	-0.40779
CACNA1G	5	0.12726	0.2384	1	865	3	-0.52836	0.91446	0.92726	1	2884	0	-0.52836
ALPP	5	0.1274	0.2384	1	866	3	-0.28886	0.92811	0.93922	1	2926	0	-0.28886
GLYCTK	5	0.12761	0.2384	1	867	3	-0.33449	0.3437	0.52967	1	1594	2	-0.33449
SPTLC1	5	0.12768	0.2384	1	868	3	-0.30654	0.50646	0.68426	1	2046	2	-0.30654
CHPF2	5	0.12821	0.24044	1	869	2	0.018046	0.31626	0.50864	1	1522	2	0.018046
PFKFB2	5	0.12824	0.24044	1	870	2	-0.12535	0.26542	0.46697	1	1374	2	-0.12535
CYP26A1	5	0.12848	0.24044	1	871	2	-0.18828	0.53144	0.7089	1	2115	1	-0.18828
ORAI1	5	0.12861	0.24044	1	872	3	-0.38403	0.19523	0.41554	1	1178	2	-0.38403
FABP12	5	0.12918	0.24044	1	873	2	-0.14955	0.78557	0.81553	1	2520	1	-0.14955
NUDT7	5	0.12939	0.24044	1	874	2	-0.11212	0.28824	0.49106	1	1433	2	-0.11212
ATPIF1	5	0.12984	0.24044	1	875	2	0.0063615	0.25486	0.46076	1	1347	2	0.0063615
GPX4	5	0.13001	0.24044	1	876	3	-0.1342	0.17116	0.36108	1	1066	2	-0.1342
FNTA	5	0.13038	0.24153	1	877	3	-0.20779	0.93926	0.94548	1	2959	0	-0.20779
EHHADH	5	0.13063	0.24153	1	878	3	-0.30821	0.14056	0.3088	1	915	2	-0.30821
AGPS	5	0.13064	0.24153	1	879	3	-0.20245	0.0016546	0.0073387	1	23	2	-0.20245
ADH4	5	0.1312	0.24154	1	880	2	0.032512	0.07724	0.20857	1	562	1	0.032512
COX6B1	5	0.13128	0.24154	1	881	3	-0.3289	0.35255	0.53422	1	1625	2	-0.3289
THEM4	5	0.13142	0.24154	1	882	3	-0.40358	0.65162	0.75276	1	2284	1	-0.40358
ASNSD1	5	0.13147	0.24154	1	883	2	-0.14656	0.20762	0.42715	1	1220	1	-0.14656
B4GALNT2	5	0.13179	0.24273	1	884	2	-0.16409	0.41079	0.59098	1	1768	2	-0.16409
TDO2	5	0.13201	0.24381	1	885	3	-0.21353	0.93366	0.94238	1	2943	0	-0.21353
SLC6A18	5	0.1321	0.24381	1	886	2	-0.055227	0.36895	0.55454	1	1668	2	-0.055227
SLC19A1	5	0.13236	0.24381	1	887	3	-0.43834	0.85723	0.87191	1	2696	1	-0.43834
TK1	5	0.13263	0.2449	1	888	3	-0.16991	0.28207	0.48857	1	1418	2	-0.16991
GALNT18	5	0.13282	0.2449	1	889	2	-0.21048	0.83344	0.84564	1	2637	1	-0.21048
DHDH	5	0.13309	0.24593	1	890	3	-0.25937	0.84042	0.85109	1	2654	1	-0.25937
PYCRL	5	0.13316	0.24593	1	891	3	-0.34217	0.18182	0.37944	1	1121	2	-0.34217
SARDH	5	0.13364	0.24593	1	892	1	0.032831	0.096169	0.23171	1	669	2	0.032831
SPG20	5	0.13418	0.24925	1	893	3	-0.27903	0.49228	0.66523	1	1998	2	-0.27903
TYW5	5	0.13441	0.24925	1	894	3	-0.31147	0.26991	0.47067	1	1385	2	-0.31147
ESD	5	0.13445	0.24925	1	895	2	-0.13673	0.68005	0.76003	1	2333	1	-0.13673
SQLE	5	0.13543	0.24925	1	896	3	-0.3512	0.039314	0.11882	1	360	1	-0.3512
GXYLT2	5	0.13578	0.24925	1	897	2	0.19851	0.12302	0.28447	1	816	3	0.19851
PHYHD1	5	0.1358	0.24925	1	898	3	-0.26767	0.80264	0.82566	1	2554	1	-0.26767
SLC4A3	5	0.136	0.25047	1	899	3	-0.29286	0.09212	0.23171	1	639	2	-0.29286
AIFM1	5	0.13631	0.25047	1	900	3	-0.29618	0.27567	0.4848	1	1399	2	-0.29618
ALDH3A1	5	0.13634	0.25047	1	901	2	0.13877	0.29102	0.4923	1	1442	2	0.13877
ST3GAL1	5	0.13652	0.25047	1	902	3	-0.27888	0.40603	0.58691	1	1757	1	-0.27888
MCAT	5	0.13727	0.25145	1	903	2	0.15992	0.62952	0.75	1	2244	1	0.15992
MPP3	5	0.13735	0.25145	1	904	3	-0.42084	0.59005	0.73592	1	2201	1	-0.42084
AMD1	5	0.13769	0.25145	1	905	2	-0.16217	0.94346	0.94714	1	2979	0	-0.16217
P4HA2	5	0.13831	0.2554	1	906	3	-0.24297	0.87491	0.89004	1	2754	0	-0.24297
PIK3C2B	5	0.13861	0.2554	1	907	3	-0.29471	0.95884	0.96578	1	3028	0	-0.29471
PON2	5	0.13904	0.25541	1	908	2	-0.048192	0.27176	0.47603	1	1391	1	-0.048192
SLC2A3	5	0.13913	0.25541	1	909	3	-0.30441	0.18269	0.38162	1	1128	2	-0.30441
HTR3A	5	0.13958	0.25541	1	910	2	-0.082942	0.95044	0.95608	1	2999	0	-0.082942
CBR3	5	0.1398	0.25541	1	911	3	-0.29604	0.0086279	0.034169	1	107	2	-0.29604
SLC25A2	5	0.13985	0.25665	1	912	2	0.013309	0.53408	0.71172	1	2121	1	0.013309
GSTA5	5	0.13988	0.25665	1	913	3	-0.2532	0.82667	0.83565	1	2621	1	-0.2532
KMT2B	5	0.14024	0.2587	1	914	3	-0.18173	0.32722	0.51812	1	1544	2	-0.18173
CHST4	5	0.14055	0.2587	1	915	3	-0.31218	0.33913	0.52682	1	1581	1	-0.31218
PANK4	5	0.14066	0.2587	1	916	3	-0.17965	0.7092	0.77294	1	2388	1	-0.17965
HYAL1	5	0.14078	0.2587	1	917	3	-0.24845	0.98962	0.9931	1	3132	0	-0.24845
KDM5D	5	0.14092	0.2587	1	918	3	-0.3563	0.93152	0.94073	1	2937	0	-0.3563
CYP2C8	5	0.14099	0.2587	1	919	2	-0.11629	0.90451	0.9202	1	2853	0	-0.11629
ITPK1	5	0.14121	0.2587	1	920	2	0.27696	0.092425	0.23171	1	642	3	0.27696
CYP17A1	5	0.1413	0.2587	1	921	3	-0.27141	0.080085	0.20968	1	582	2	-0.27141
PLA2G4D	5	0.14146	0.2587	1	922	2	0.76736	0.0032554	0.014518	1	39	3	0.76736
SLC26A6	5	0.14216	0.2587	1	923	3	-0.35007	0.74739	0.79021	1	2446	1	-0.35007
APOA1	5	0.14228	0.2587	1	924	3	-0.24214	0.88172	0.89657	1	2786	0	-0.24214
LDHB	5	0.14281	0.2587	1	925	1	0.23687	0.14175	0.3088	1	919	3	0.23687
ARSI	5	0.14364	0.26242	1	926	3	-0.35931	0.28834	0.49106	1	1434	1	-0.35931
ALDH6A1	5	0.14367	0.26242	1	927	3	-0.44204	0.88167	0.89657	1	2785	0	-0.44204
GFPT2	5	0.14371	0.26242	1	928	3	-0.43377	0.70625	0.76996	1	2384	1	-0.43377
THRSP	5	0.14386	0.26242	1	929	3	-0.27092	0.30144	0.4995	1	1474	1	-0.27092
BDH2	5	0.14388	0.26242	1	930	3	-0.14681	0.49631	0.6736	1	2014	1	-0.14681
ALOX12	5	0.144	0.26242	1	931	2	-0.033418	0.67625	0.75854	1	2328	1	-0.033418
TK2	5	0.14415	0.26242	1	932	3	-0.21772	0.88876	0.90372	1	2809	0	-0.21772
GALT	5	0.14432	0.26242	1	933	3	-0.28002	0.13886	0.30307	1	909	2	-0.28002
PLCZ1	5	0.14464	0.26243	1	934	2	0.25099	0.1625	0.33501	1	1027	3	0.25099
SLC22A12	5	0.1447	0.26243	1	935	3	-0.4322	0.75488	0.79153	1	2461	1	-0.4322
CACNA1F	5	0.14475	0.26243	1	936	2	-0.12921	0.95088	0.95671	1	3001	0	-0.12921
IDS	5	0.14485	0.26243	1	937	3	-0.24155	0.2602	0.462	1	1360	2	-0.24155
DLAT	5	0.14495	0.26243	1	938	2	-0.073059	0.064926	0.18253	1	497	2	-0.073059
CACNG4	5	0.145	0.26243	1	939	3	-0.23688	0.89289	0.9061	1	2823	0	-0.23688
CHST14	5	0.14515	0.26243	1	940	3	-0.30276	0.7664	0.80134	1	2478	1	-0.30276
SLC22A1	5	0.14522	0.26243	1	941	1	0.14981	0.31995	0.51108	1	1530	2	0.14981
ST6GAL1	5	0.14546	0.26243	1	942	3	-0.21647	0.1688	0.35864	1	1057	2	-0.21647
KCNH3	5	0.14549	0.26243	1	943	2	-0.1876	0.80821	0.82846	1	2569	1	-0.1876
LDHC	5	0.14629	0.26364	1	944	3	-0.32547	0.062909	0.17519	1	489	2	-0.32547
ACSM1	5	0.14675	0.26364	1	945	3	-0.36338	0.50606	0.68426	1	2045	1	-0.36338
FUT6	5	0.14709	0.26364	1	946	2	-0.11578	0.6226	0.74859	1	2239	1	-0.11578
ARG2	5	0.14778	0.26364	1	947	3	-0.20766	0.97527	0.98075	1	3084	0	-0.20766
PNPLA5	5	0.1479	0.26364	1	948	2	-0.19887	0.88553	0.90017	1	2801	0	-0.19887
NDUFB2	5	0.14802	0.26364	1	949	3	-0.43997	0.92628	0.93768	1	2920	0	-0.43997
TPH2	5	0.14816	0.26364	1	950	1	0.14082	0.73639	0.786	1	2432	1	0.14082
HSD17B3	5	0.14821	0.26364	1	951	3	-0.35164	0.81406	0.82984	1	2586	1	-0.35164
SLC18A3	5	0.14832	0.26364	1	952	2	-0.093258	0.95829	0.96533	1	3024	0	-0.093258
ATP6AP2	5	0.14836	0.26364	1	953	3	-0.30838	0.099449	0.23661	1	684	2	-0.30838
GYG2	5	0.14843	0.26364	1	954	2	0.273	0.082186	0.21632	1	590	3	0.273
SLC7A11	5	0.14859	0.26364	1	955	3	-0.51871	0.36193	0.5443	1	1652	1	-0.51871
MTHFS	5	0.1487	0.26364	1	956	1	0.23577	0.099526	0.23661	1	685	3	0.23577
SLC15A1	5	0.14875	0.26364	1	957	2	-0.015017	0.10844	0.26098	1	749	2	-0.015017
TYR	5	0.14882	0.26364	1	958	3	-0.287	0.073531	0.19403	1	542	2	-0.287
ACSS1	5	0.14886	0.26364	1	959	2	0.0060551	0.083207	0.21835	1	596	2	0.0060551
SNCA	5	0.14923	0.26364	1	960	1	-0.014681	0.82592	0.83565	1	2617	1	-0.014681
PCK2	5	0.14951	0.26364	1	961	2	0.012816	0.41194	0.59099	1	1770	2	0.012816
GMPR2	5	0.14959	0.26364	1	962	3	-0.34591	0.96875	0.9749	1	3062	0	-0.34591
SPTLC3	5	0.14962	0.26364	1	963	3	-0.33904	0.53326	0.71029	1	2120	1	-0.33904
MFSD9	5	0.14973	0.26364	1	964	2	-0.078466	0.45179	0.62398	1	1874	2	-0.078466
GABRB3	5	0.14998	0.26364	1	965	3	-0.22207	0.91145	0.92623	1	2876	0	-0.22207
PPA2	5	0.15003	0.26364	1	966	2	-0.13127	0.85863	0.87611	1	2700	1	-0.13127
DPM3	5	0.1503	0.26364	1	967	3	-0.23512	0.4456	0.61837	1	1856	2	-0.23512
SLC25A4	5	0.15068	0.26364	1	968	3	-0.23913	0.71078	0.77441	1	2391	1	-0.23913
PDE9A	5	0.15091	0.26364	1	969	3	-0.31223	0.1617	0.33134	1	1021	2	-0.31223
EBP	5	0.15093	0.26364	1	970	3	-0.30052	0.057483	0.15615	1	467	2	-0.30052
HNMT	5	0.1511	0.26479	1	971	2	0.0042598	0.0034887	0.0157	1	41	2	0.0042598
FIG4	5	0.15163	0.26479	1	972	2	-0.057212	0.88078	0.89657	1	2782	0	-0.057212
ABCD4	5	0.1519	0.26479	1	973	2	0.18996	0.46374	0.6324	1	1916	2	0.18996
ALKBH2	5	0.15207	0.26601	1	974	3	-0.27209	0.86462	0.87901	1	2725	0	-0.27209
ACBD7	5	0.15213	0.26601	1	975	2	-0.072499	0.22177	0.44151	1	1259	1	-0.072499
GLCE	5	0.15223	0.26976	1	976	3	-0.36581	0.70384	0.76996	1	2380	1	-0.36581
SCLY	5	0.15224	0.26976	1	977	2	0.15143	0.050027	0.14605	1	424	2	0.15143
IDH3B	5	0.15238	0.26976	1	978	3	-0.38987	0.010135	0.036948	1	122	2	-0.38987
ADSS1	5	0.15246	0.26976	1	979	2	0.67479	0.0069479	0.02384	1	86	3	0.67479
COQ7	5	0.15279	0.26976	1	980	2	0.11845	0.0062121	0.02304	1	79	2	0.11845
SLC43A2	5	0.1529	0.26976	1	981	2	0.047353	0.18415	0.38418	1	1134	1	0.047353
NDUFAF1	5	0.15296	0.26976	1	982	1	0.18441	0.1299	0.29417	1	862	3	0.18441
ST8SIA6	5	0.15323	0.26976	1	983	1	0.318	0.035383	0.10887	1	320	4	0.318
SLC36A1	5	0.1534	0.26976	1	984	3	-0.50712	0.2948	0.49479	1	1452	2	-0.50712
CACNG7	5	0.15389	0.27594	1	985	3	-0.17521	0.068305	0.18438	1	515	2	-0.17521
SLC28A2	5	0.154	0.27594	1	986	2	-0.11322	0.26418	0.46697	1	1369	2	-0.11322
NALCN	5	0.15429	0.27699	1	987	2	0.096199	0.79896	0.82131	1	2548	1	0.096199
KCTD10	5	0.15473	0.27699	1	988	3	-0.20682	0.92196	0.9318	1	2904	0	-0.20682
NDUFV2	5	0.15488	0.27699	1	989	3	-0.25892	0.91223	0.92623	1	2878	0	-0.25892
HEXD	5	0.15496	0.27699	1	990	3	-0.47122	0.94461	0.94938	1	2983	0	-0.47122
DUT	5	0.15512	0.27699	1	991	3	-0.27328	0.73472	0.786	1	2429	1	-0.27328
AADACL3	5	0.15543	0.27699	1	992	3	-0.24083	0.86059	0.87611	1	2706	1	-0.24083
AMY1C	5	0.15551	0.27699	1	993	3	-0.30021	0.45631	0.62398	1	1887	1	-0.30021
PRUNE1	5	0.15565	0.27699	1	994	2	-0.082736	0.44396	0.61837	1	1851	2	-0.082736
IDI1	5	0.15567	0.27699	1	995	3	-0.32704	0.70108	0.76995	1	2373	1	-0.32704
SPHK2	5	0.15575	0.27699	1	996	3	-0.40285	0.97895	0.98454	1	3095	0	-0.40285
GALNT14	5	0.15583	0.27699	1	997	3	-0.36116	0.21965	0.43629	1	1254	1	-0.36116
KCNA5	5	0.15598	0.27699	1	998	3	-0.35214	0.019056	0.069248	1	202	2	-0.35214
PGP	5	0.15653	0.27699	1	999	2	-0.0678	0.90749	0.92326	1	2865	0	-0.0678
SULT6B1	5	0.15694	0.27699	1	1000	2	0.17381	0.32105	0.51108	1	1532	2	0.17381
A4GALT	5	0.15788	0.28373	1	1001	3	-0.19171	0.36972	0.55672	1	1671	2	-0.19171
CYP4A22	5	0.1588	0.28732	1	1002	1	0.14125	0.86993	0.8832	1	2740	0	0.14125
COX18	5	0.15885	0.28732	1	1003	2	-0.045659	0.11912	0.27876	1	797	2	-0.045659
INPP5A	5	0.15955	0.28732	1	1004	3	-0.216	0.85542	0.87057	1	2690	1	-0.216
EHMT1	5	0.15962	0.28732	1	1005	3	-0.39662	0.78209	0.81409	1	2510	1	-0.39662
PKLR	5	0.15985	0.28838	1	1006	2	-0.10983	0.95882	0.96578	1	3027	0	-0.10983
HIBCH	5	0.16007	0.28838	1	1007	2	-0.018478	0.77185	0.8071	1	2486	1	-0.018478
SLC25A16	5	0.16012	0.28838	1	1008	2	-0.18468	0.52294	0.70286	1	2090	2	-0.18468
NIT1	5	0.16051	0.29215	1	1009	3	-0.2672	0.35383	0.53422	1	1628	1	-0.2672
COX2	5	0.16065	0.29215	1	1010	1	0.43377	0.042638	0.1416	1	385	3	0.43377
GYS2	5	0.16091	0.29215	1	1011	2	-0.063957	0.81626	0.83267	1	2590	1	-0.063957
CLIC5	5	0.16107	0.29215	1	1012	2	-0.084734	0.3581	0.53928	1	1644	1	-0.084734
NDUFA11	5	0.16114	0.29215	1	1013	3	-0.25568	0.41972	0.6027	1	1795	1	-0.25568
HDDC2	5	0.1613	0.29215	1	1014	3	-0.26568	0.31411	0.50864	1	1516	1	-0.26568
SLC30A3	5	0.1614	0.29215	1	1015	2	-0.20665	0.19032	0.3999	1	1156	1	-0.20665
ACSM5	5	0.16144	0.29215	1	1016	2	-0.072753	0.11809	0.27876	1	792	1	-0.072753
SLC9A9	5	0.16266	0.29323	1	1017	3	-0.18267	0.4002	0.58505	1	1740	1	-0.18267
SLC26A4	5	0.16274	0.29323	1	1018	2	-0.04617	0.83351	0.84564	1	2638	1	-0.04617
KCNN3	5	0.16274	0.29323	1	1019	3	-0.36162	0.48587	0.65578	1	1985	1	-0.36162
GLA	5	0.16276	0.29323	1	1020	1	-0.036515	0.92681	0.93848	1	2922	0	-0.036515
GRIN1	5	0.16302	0.29323	1	1021	2	-0.025064	0.80732	0.827	1	2566	1	-0.025064
NDUFS5	5	0.16306	0.29323	1	1022	3	-0.27728	0.064062	0.18031	1	493	1	-0.27728
MBOAT2	5	0.16322	0.29323	1	1023	3	-0.26015	0.7423	0.78878	1	2440	1	-0.26015
AADACL4	5	0.16374	0.29428	1	1024	2	-0.026233	0.59139	0.73732	1	2204	1	-0.026233
SLC17A3	5	0.16397	0.29428	1	1025	2	-0.094955	0.17533	0.37131	1	1090	1	-0.094955
SLC4A7	5	0.16486	0.29531	1	1026	3	-0.27794	0.72154	0.7801	1	2409	1	-0.27794
PI4KB	5	0.16513	0.29531	1	1027	2	0.018133	0.6524	0.75276	1	2287	1	0.018133
FUT2	5	0.16524	0.29531	1	1028	3	-0.30397	0.69172	0.76855	1	2352	1	-0.30397
PAFAH1B3	5	0.16552	0.29532	1	1029	2	-0.10524	0.1511	0.31786	1	967	2	-0.10524
MIF	5	0.16597	0.29532	1	1030	3	-0.41876	0.64491	0.75135	1	2269	1	-0.41876
SLC39A4	5	0.16644	0.29645	1	1031	2	-0.18094	0.74618	0.79021	1	2445	1	-0.18094
PCBD2	5	0.16646	0.29645	1	1032	3	-0.27459	0.72599	0.7801	1	2416	1	-0.27459
PPARD	5	0.16731	0.29771	1	1033	3	-0.28154	0.40964	0.59098	1	1765	2	-0.28154
NDUFS8	5	0.16749	0.29771	1	1034	1	-0.085007	0.60429	0.74153	1	2216	1	-0.085007
SLC35E3	5	0.16775	0.29771	1	1035	1	-0.13006	0.26585	0.46698	1	1377	1	-0.13006
SULT1A3	5	0.16802	0.29771	1	1036	1	0.13102	0.65913	0.75276	1	2296	1	0.13102
GAL3ST4	5	0.16825	0.29875	1	1037	3	-0.20275	0.77875	0.81124	1	2503	1	-0.20275
HSD17B14	5	0.16854	0.29982	1	1038	1	0.10938	0.37625	0.56157	1	1687	2	0.10938
NKX2-3	5	0.16891	0.29982	1	1039	2	-0.097601	0.022428	0.076378	1	231	1	-0.097601
ATP6V0B	5	0.16906	0.29982	1	1040	3	-0.17915	0.87838	0.89525	1	2772	0	-0.17915
KCNK17	5	0.16923	0.29982	1	1041	3	-0.2446	0.5131	0.69369	1	2066	1	-0.2446
OAS3	5	0.16933	0.30098	1	1042	1	0.19514	0.035612	0.10887	1	324	4	0.19514
ATP10A	5	0.16939	0.30217	1	1043	3	-0.38523	0.41222	0.59099	1	1771	1	-0.38523
ABCD1	5	0.16985	0.30341	1	1044	1	0.16574	0.16162	0.33028	1	1019	3	0.16574
CHRNA10	5	0.16992	0.30341	1	1045	2	-0.04308	0.87753	0.89398	1	2768	0	-0.04308
FADS6	5	0.17011	0.30341	1	1046	2	-0.063907	0.33432	0.52081	1	1565	1	-0.063907
NCEH1	5	0.17037	0.30341	1	1047	1	0.20583	0.1151	0.27312	1	774	3	0.20583
SLC39A5	5	0.17045	0.30341	1	1048	3	-0.28641	0.71989	0.7801	1	2406	1	-0.28641
FDFT1	5	0.17049	0.30341	1	1049	2	-0.13968	0.20536	0.42173	1	1216	2	-0.13968
CNDP1	5	0.1706	0.30341	1	1050	3	-0.30884	0.87804	0.89399	1	2770	0	-0.30884
KCNA4	5	0.17078	0.30462	1	1051	3	-0.18559	0.066077	0.18371	1	504	1	-0.18559
B3GNT4	5	0.17083	0.30462	1	1052	3	-0.28471	0.11726	0.27876	1	787	1	-0.28471
IDH3G	5	0.17116	0.30816	1	1053	2	-0.16054	0.4738	0.64439	1	1948	1	-0.16054
UGCG	5	0.17142	0.30816	1	1054	3	-0.53685	0.95347	0.95976	1	3011	0	-0.53685
SLC38A3	5	0.17162	0.30816	1	1055	2	-0.17392	0.83632	0.84838	1	2648	1	-0.17392
CACNA2D4	5	0.17184	0.30816	1	1056	2	-0.0526	0.54503	0.71751	1	2135	1	-0.0526
SULT1A1	5	0.17193	0.30816	1	1057	3	-0.36447	0.10766	0.2592	1	738	2	-0.36447
GRIN3B	5	0.17202	0.30816	1	1058	3	-0.24629	0.45854	0.62543	1	1897	1	-0.24629
MFNG	5	0.17243	0.30816	1	1059	3	-0.25035	0.0059098	0.022336	1	74	1	-0.25035
LHPP	5	0.17251	0.30816	1	1060	3	-0.26159	0.9317	0.94073	1	2938	0	-0.26159
CANT1	5	0.17298	0.30907	1	1061	2	0.035703	0.20686	0.42715	1	1217	1	0.035703
SLC2A12	5	0.17351	0.30907	1	1062	2	0.15608	0.12466	0.28989	1	826	2	0.15608
DNMT3B	5	0.17359	0.30907	1	1063	3	-0.2668	0.9844	0.98753	1	3117	0	-0.2668
HEXA	5	0.17392	0.30907	1	1064	3	-0.38197	0.52394	0.7043	1	2097	1	-0.38197
SLC25A3	5	0.17445	0.30907	1	1065	2	0.04448	0.051203	0.1466	1	430	2	0.04448
SLC10A5	5	0.1745	0.30907	1	1066	3	-0.35817	0.77232	0.8071	1	2488	1	-0.35817
GNPTAB	5	0.17475	0.30907	1	1067	3	-0.28979	0.016147	0.05427	1	172	1	-0.28979
PIGG	5	0.17507	0.31022	1	1068	2	0.20073	0.14288	0.3112	1	923	3	0.20073
HMGCR	5	0.17533	0.31022	1	1069	1	0.50517	0.0041809	0.017502	1	53	4	0.50517
SIRT5	5	0.17541	0.31022	1	1070	3	-0.37474	0.09027	0.22978	1	631	1	-0.37474
MGST2	5	0.17582	0.31022	1	1071	2	-0.12221	0.64104	0.75135	1	2259	1	-0.12221
HTATIP2	5	0.17611	0.31022	1	1072	2	-0.14705	0.074959	0.20555	1	546	2	-0.14705
NDST4	5	0.17624	0.31022	1	1073	3	-0.29313	0.60616	0.74154	1	2218	1	-0.29313
ACOT9	5	0.17637	0.31022	1	1074	1	0.043894	0.41882	0.59939	1	1793	2	0.043894
CA3	5	0.17649	0.31022	1	1075	3	-0.23241	0.039903	0.12001	1	366	1	-0.23241
HSD17B11	5	0.17673	0.31022	1	1076	2	-0.12723	0.24498	0.45695	1	1321	2	-0.12723
COQ5	5	0.17689	0.31022	1	1077	3	-0.21281	0.25463	0.46076	1	1346	1	-0.21281
LMF1	5	0.17715	0.31022	1	1078	2	0.28184	0.11456	0.27197	1	772	3	0.28184
URAD	5	0.17716	0.31022	1	1079	3	-0.35008	0.21812	0.43496	1	1249	2	-0.35008
LOXL1	5	0.1773	0.31022	1	1080	3	-0.2125	0.45355	0.62398	1	1877	2	-0.2125
CAV1	5	0.17767	0.31149	1	1081	2	0.10828	0.40041	0.58505	1	1741	1	0.10828
GSTO2	5	0.17793	0.31149	1	1082	2	0.2823	0.079102	0.20968	1	573	3	0.2823
SDR39U1	5	0.17808	0.31149	1	1083	3	-0.23442	0.97127	0.97608	1	3071	0	-0.23442
ADIPOR1	5	0.17816	0.31149	1	1084	3	-0.30645	0.79058	0.81698	1	2530	1	-0.30645
HCCS	5	0.17871	0.31275	1	1085	2	0.21861	0.047524	0.14383	1	414	3	0.21861
KCNK12	5	0.17884	0.31275	1	1086	3	-0.32542	0.30621	0.50335	1	1490	1	-0.32542
SERPINA1	5	0.1789	0.31275	1	1087	3	-0.22366	0.54632	0.71751	1	2137	1	-0.22366
ELOVL2	5	0.17902	0.31275	1	1088	2	-0.0066056	0.10785	0.26098	1	739	2	-0.0066056
HPSE2	5	0.17949	0.31383	1	1089	1	-0.08187	0.1503	0.31786	1	962	1	-0.08187
PIP5K1C	5	0.17951	0.31383	1	1090	3	-0.23054	0.86115	0.87761	1	2710	1	-0.23054
KCNN1	5	0.18094	0.31498	1	1091	3	-0.38051	0.92845	0.93922	1	2928	0	-0.38051
GABRA1	5	0.18108	0.31498	1	1092	2	-0.084344	0.076955	0.20856	1	559	1	-0.084344
ADCY5	5	0.18128	0.31498	1	1093	3	-0.35185	0.17273	0.36364	1	1076	1	-0.35185
KCNK18	5	0.18154	0.31498	1	1094	3	-0.26	0.51532	0.69672	1	2072	2	-0.26
QSOX2	5	0.1822	0.31498	1	1095	3	-0.23234	0.76229	0.79994	1	2473	1	-0.23234
STS	5	0.18234	0.31498	1	1096	3	-0.17848	0.90548	0.92127	1	2856	0	-0.17848
SLC8A3	5	0.18338	0.31864	1	1097	2	-0.030682	0.62566	0.75	1	2242	1	-0.030682
HSD11B1L	5	0.18361	0.31864	1	1098	2	-0.17129	0.64597	0.75135	1	2272	1	-0.17129
GLYATL1	5	0.18415	0.32095	1	1099	1	0.37489	0.051626	0.1466	1	435	3	0.37489
SLC7A8	5	0.18424	0.32208	1	1100	3	-0.20397	0.83517	0.84708	1	2646	1	-0.20397
ACP2	5	0.18441	0.32208	1	1101	2	-0.10242	0.41281	0.59099	1	1774	1	-0.10242
ALDH8A1	5	0.18466	0.32208	1	1102	3	-0.31209	0.88073	0.89657	1	2781	0	-0.31209
SLC29A1	5	0.18467	0.32208	1	1103	3	-0.26342	0.58104	0.73153	1	2186	1	-0.26342
SLC24A1	5	0.18475	0.32208	1	1104	3	-0.14914	0.55687	0.71877	1	2150	1	-0.14914
LSR	5	0.18518	0.32795	1	1105	2	-0.078237	0.35447	0.53553	1	1632	2	-0.078237
CHSY3	5	0.18534	0.32795	1	1106	3	-0.35721	0.83453	0.84708	1	2641	1	-0.35721
GPX7	5	0.18535	0.32795	1	1107	3	-0.2728	0.13547	0.30074	1	893	2	-0.2728
FAAH2	5	0.18558	0.32796	1	1108	3	-0.29228	0.22957	0.44271	1	1276	1	-0.29228
HIF1AN	5	0.18577	0.33045	1	1109	3	-0.33495	0.93422	0.94313	1	2944	0	-0.33495
CHRNA7	5	0.18594	0.33045	1	1110	3	-0.24991	0.46612	0.63382	1	1924	2	-0.24991
MPPE1	5	0.18611	0.33045	1	1111	3	-0.23221	0.24133	0.45563	1	1311	1	-0.23221
TAP1	5	0.18673	0.33045	1	1112	2	-0.068476	0.31982	0.51108	1	1529	2	-0.068476
SLC2A11	5	0.18698	0.33045	1	1113	3	-0.19082	0.010437	0.037288	1	126	2	-0.19082
SLC26A3	5	0.18708	0.33045	1	1114	2	0.14041	0.41003	0.59098	1	1766	2	0.14041
PLA2G4B	5	0.18714	0.33045	1	1115	3	-0.2325	0.345	0.52967	1	1598	2	-0.2325
DCXR	5	0.18723	0.33045	1	1116	3	-0.2735	0.40703	0.58691	1	1758	1	-0.2735
CYP2J2	5	0.1875	0.33045	1	1117	2	-0.18885	0.15224	0.32085	1	975	2	-0.18885
PSAP	5	0.18775	0.33045	1	1118	2	-0.13867	0.45798	0.62543	1	1895	1	-0.13867
FUT4	5	0.18801	0.33045	1	1119	2	0.082388	0.0068165	0.023572	1	84	1	0.082388
ACSBG1	5	0.18847	0.33367	1	1120	2	-0.15229	0.89172	0.90493	1	2819	0	-0.15229
GSTM1	5	0.18851	0.33367	1	1121	3	-0.2523	0.6631	0.75416	1	2306	1	-0.2523
ST8SIA1	5	0.18877	0.33367	1	1122	3	-0.26261	0.78119	0.81409	1	2509	1	-0.26261
HIBADH	5	0.18878	0.33367	1	1123	2	-0.070649	0.82084	0.83267	1	2605	1	-0.070649
SLC25A18	5	0.18893	0.33367	1	1124	2	-0.025803	0.62759	0.75	1	2243	1	-0.025803
LOXL4	5	0.18903	0.33367	1	1125	3	-0.17127	0.35639	0.53553	1	1637	2	-0.17127
LPPR2	5	0.18904	0.33367	1	1126	1	0.46053	0.020755	0.071724	1	218	4	0.46053
SFXN2	5	0.18955	0.33486	1	1127	1	0.036487	0.1812	0.37944	1	1118	2	0.036487
SULT1C4	5	0.18972	0.33486	1	1128	3	-0.21194	0.8632	0.87761	1	2719	1	-0.21194
ACAT1	5	0.18975	0.33486	1	1129	3	-0.26951	0.50191	0.67658	1	2031	2	-0.26951
SLC22A20	5	0.18989	0.33486	1	1130	3	-0.17998	0.20282	0.42041	1	1209	2	-0.17998
ASL	5	0.19007	0.33619	1	1131	2	0.26481	0.058285	0.15867	1	471	2	0.26481
NDUFB7	5	0.19058	0.33746	1	1132	3	-0.24439	0.057706	0.15731	1	468	2	-0.24439
FUT3	5	0.19075	0.33747	1	1133	3	-0.35539	0.52377	0.7043	1	2095	1	-0.35539
SLC7A7	5	0.19084	0.33747	1	1134	1	0.17145	0.10176	0.24016	1	703	3	0.17145
COLGALT2	5	0.19103	0.3398	1	1135	2	0.25761	0.093454	0.23171	1	650	3	0.25761
FADS3	5	0.1911	0.3398	1	1136	3	-0.28337	0.90497	0.92127	1	2855	0	-0.28337
MSRB2	5	0.19118	0.33981	1	1137	3	-0.35993	0.64926	0.75135	1	2278	1	-0.35993
PLCL2	5	0.19127	0.33981	1	1138	3	-0.46806	0.15345	0.32234	1	978	2	-0.46806
KCNN4	5	0.19149	0.34115	1	1139	2	-0.060632	0.0072129	0.024528	1	89	2	-0.060632
ANGPTL3	5	0.19161	0.34115	1	1140	2	-0.093886	0.37642	0.56157	1	1688	1	-0.093886
HYAL4	5	0.19214	0.34251	1	1141	3	-0.18977	0.59168	0.73868	1	2205	1	-0.18977
CHST2	5	0.19243	0.34356	1	1142	2	-0.28059	0.89421	0.90946	1	2830	0	-0.28059
SLC22A17	5	0.19248	0.34356	1	1143	3	-0.29517	0.87288	0.88864	1	2748	0	-0.29517
SDR16C5	5	0.19263	0.34356	1	1144	1	0.08349	0.025458	0.084747	1	250	2	0.08349
MARC2	5	0.19266	0.34356	1	1145	3	-0.25316	0.87623	0.89269	1	2761	0	-0.25316
SLC1A1	5	0.19266	0.34356	1	1146	2	0.44348	0.010111	0.036948	1	121	3	0.44348
FUCA2	5	0.19278	0.34356	1	1147	2	-0.14844	0.2194	0.43629	1	1253	2	-0.14844
COX7B2	5	0.19292	0.34356	1	1148	3	-0.2071	0.48708	0.65578	1	1987	2	-0.2071
MOXD1	5	0.19318	0.34356	1	1149	3	-0.26164	0.67091	0.7556	1	2319	1	-0.26164
CKMT2	5	0.19335	0.34356	1	1150	3	-0.42444	0.40583	0.58691	1	1755	1	-0.42444
ADCY8	5	0.1934	0.34356	1	1151	3	-0.19174	0.48711	0.65578	1	1988	2	-0.19174
CYP2C19	5	0.19352	0.34356	1	1152	3	-0.28528	0.19558	0.4167	1	1180	2	-0.28528
KCNK4	5	0.19391	0.34356	1	1153	1	-0.014382	0.01925	0.070121	1	205	2	-0.014382
ABCD3	5	0.19394	0.34356	1	1154	2	0.07	0.017046	0.05901	1	178	1	0.07
CACNG5	5	0.19405	0.34356	1	1155	3	-0.2237	0.29801	0.49709	1	1459	1	-0.2237
ACOXL	5	0.19406	0.34356	1	1156	2	0.010307	0.57815	0.73153	1	2181	1	0.010307
AMACR	5	0.19413	0.34356	1	1157	3	-0.44425	0.011641	0.039265	1	139	1	-0.44425
NUDT22	5	0.19519	0.34463	1	1158	3	-0.1401	0.55608	0.71877	1	2146	1	-0.1401
CACNG6	5	0.19527	0.34463	1	1159	3	-0.245	0.87305	0.88864	1	2749	0	-0.245
B4GALT6	5	0.19535	0.34463	1	1160	2	0.0371	0.28231	0.48857	1	1419	2	0.0371
PLA2G4C	5	0.19544	0.34463	1	1161	3	-0.22946	0.44876	0.62027	1	1864	2	-0.22946
SAT2	5	0.19544	0.34463	1	1162	1	0.24959	0.039214	0.11882	1	359	4	0.24959
ATP1B4	5	0.1957	0.34463	1	1163	1	0.33417	0.029777	0.093204	1	278	4	0.33417
SLC38A6	5	0.19605	0.34463	1	1164	3	-0.33129	0.58616	0.73437	1	2191	1	-0.33129
DHFR	5	0.19617	0.34463	1	1165	3	-0.17657	0.92819	0.93922	1	2927	0	-0.17657
PIP4K2B	5	0.19621	0.34463	1	1166	2	0.23108	0.10013	0.23661	1	690	3	0.23108
ADCY1	5	0.19628	0.34463	1	1167	2	-0.066473	0.45275	0.62398	1	1875	1	-0.066473
OGDHL	5	0.19631	0.34463	1	1168	3	-0.285	0.70131	0.76995	1	2375	1	-0.285
KCNJ1	5	0.19646	0.34463	1	1169	2	-0.15526	0.59494	0.73868	1	2207	1	-0.15526
ST6GALNAC6	5	0.19664	0.34463	1	1170	2	-0.066372	0.86676	0.87902	1	2730	0	-0.066372
SFXN5	5	0.19672	0.34463	1	1171	2	0.0078835	0.87514	0.89004	1	2756	0	0.0078835
STEAP3	5	0.19722	0.34848	1	1172	2	-0.12572	0.29938	0.49709	1	1464	1	-0.12572
FABP1	5	0.19774	0.34967	1	1173	3	-0.15679	0.16018	0.33028	1	1004	2	-0.15679
PYROXD1	5	0.19816	0.35221	1	1174	2	-0.037121	0.24241	0.45695	1	1314	2	-0.037121
PDE5A	5	0.19886	0.35356	1	1175	3	-0.17611	0.24279	0.45695	1	1316	1	-0.17611
SLC35D1	5	0.19893	0.35356	1	1176	3	-0.22777	0.41519	0.59787	1	1784	2	-0.22777
ACAD11	5	0.19901	0.35356	1	1177	2	0.37283	0.060409	0.16039	1	479	3	0.37283
KCNH4	5	0.19952	0.35474	1	1178	2	-0.018632	0.015247	0.049311	1	162	2	-0.018632
LEPRE1	5	0.20009	0.35921	1	1179	3	-0.23501	0.30253	0.50201	1	1479	2	-0.23501
NT5E	5	0.20028	0.36046	1	1180	3	-0.26684	0.5564	0.71877	1	2148	1	-0.26684
MMAB	5	0.20079	0.36162	1	1181	1	0.09665	0.31168	0.50863	1	1508	2	0.09665
GDA	5	0.2013	0.36162	1	1182	2	-0.14564	0.093049	0.23171	1	644	2	-0.14564
NAT8	5	0.20155	0.36283	1	1183	1	0.018588	0.82222	0.83267	1	2607	1	0.018588
PDSS2	5	0.2018	0.36283	1	1184	1	0.21923	0.079233	0.20968	1	575	3	0.21923
GATM	5	0.20181	0.36283	1	1185	2	0.0152	0.46047	0.62906	1	1905	2	0.0152
DECR2	5	0.20193	0.36283	1	1186	2	-0.1157	0.37446	0.55886	1	1682	2	-0.1157
ALOX12B	5	0.20231	0.36284	1	1187	3	-0.16614	0.1059	0.25409	1	725	2	-0.16614
UPP2	5	0.20283	0.36607	1	1188	3	-0.23677	0.88601	0.90136	1	2803	0	-0.23677
SMYD2	5	0.20301	0.36719	1	1189	3	-0.29572	0.093328	0.23171	1	649	2	-0.29572
ACSBG2	5	0.20307	0.36719	1	1190	1	0.15938	0.22289	0.44151	1	1263	2	0.15938
CYP27B1	5	0.20319	0.36719	1	1191	3	-0.18373	0.77866	0.81124	1	2502	1	-0.18373
HSD11B2	5	0.20346	0.36719	1	1192	2	-0.072525	0.19135	0.40524	1	1160	1	-0.072525
BCHE	5	0.20358	0.36719	1	1193	1	-0.031259	0.86184	0.87761	1	2713	1	-0.031259
PLCD1	5	0.20372	0.36719	1	1194	3	-0.26607	0.37538	0.55886	1	1685	1	-0.26607
TPI1	5	0.20416	0.36839	1	1195	3	-0.21661	0.015847	0.0526	1	169	2	-0.21661
APRT	5	0.20417	0.36839	1	1196	2	-0.16778	0.98071	0.98576	1	3104	0	-0.16778
ABHD6	5	0.20484	0.36839	1	1197	2	-0.0026084	0.38943	0.57507	1	1727	1	-0.0026084
PYGL	5	0.20497	0.36839	1	1198	3	-0.21882	0.27743	0.48603	1	1404	2	-0.21882
ABHD13	5	0.20512	0.36839	1	1199	2	-0.22111	0.48193	0.65104	1	1972	1	-0.22111
SLC25A20	5	0.20535	0.36839	1	1200	1	0.42671	0.01511	0.049309	1	160	3	0.42671
GRXCR2	5	0.2056	0.36839	1	1201	2	-0.17133	0.81271	0.82984	1	2581	1	-0.17133
PDK1	5	0.20611	0.36839	1	1202	2	-0.12641	0.67216	0.7556	1	2323	1	-0.12641
VDAC2	5	0.20639	0.36839	1	1203	3	-0.25929	0.28301	0.48857	1	1421	2	-0.25929
STEAP1	5	0.20643	0.36839	1	1204	3	-0.1922	0.42735	0.60899	1	1814	2	-0.1922
SLC35A4	5	0.20678	0.3684	1	1205	2	0.17912	0.19772	0.41671	1	1188	3	0.17912
DHRS2	5	0.2069	0.3684	1	1206	2	0.059211	0.08249	0.21633	1	592	2	0.059211
GPX5	5	0.20693	0.3684	1	1207	3	-0.20117	0.47775	0.64947	1	1957	2	-0.20117
CATSPER2	5	0.20702	0.3684	1	1208	3	-0.40321	0.47038	0.63836	1	1936	2	-0.40321
IP6K2	5	0.20712	0.3684	1	1209	1	0.21996	0.16163	0.33028	1	1020	3	0.21996
PLA2G12B	5	0.20729	0.3684	1	1210	3	-0.21664	0.36677	0.55078	1	1662	2	-0.21664
CACNA1S	5	0.20737	0.3684	1	1211	2	-0.14023	0.94542	0.95008	1	2986	0	-0.14023
HGSNAT	5	0.20737	0.3684	1	1212	2	-0.12201	0.74055	0.78741	1	2437	1	-0.12201
BHMT	5	0.20738	0.3684	1	1213	3	-0.21893	0.18337	0.38162	1	1132	1	-0.21893
SLC25A17	5	0.20761	0.3684	1	1214	2	0.34846	0.10815	0.26098	1	743	3	0.34846
SLC44A4	5	0.20774	0.3684	1	1215	3	-0.27927	0.84056	0.85109	1	2655	1	-0.27927
ACN9	5	0.20797	0.3684	1	1216	3	-0.18462	0.83972	0.85109	1	2653	1	-0.18462
SCN7A	5	0.20818	0.3684	1	1217	3	-0.23988	0.0022763	0.0098659	1	32	2	-0.23988
GALNT2	5	0.20838	0.3684	1	1218	2	-0.16035	0.051898	0.1466	1	437	2	-0.16035
TF	5	0.20863	0.3684	1	1219	3	-0.19093	0.51087	0.689	1	2059	2	-0.19093
NQO1	5	0.20868	0.3684	1	1220	2	0.016266	0.19748	0.41671	1	1187	1	0.016266
SLC25A27	5	0.20913	0.37157	1	1221	1	-0.024245	0.15216	0.32085	1	974	2	-0.024245
AKR1C3	5	0.21014	0.37283	1	1222	3	-0.24884	0.81398	0.82984	1	2585	1	-0.24884
ATP4B	5	0.21016	0.37283	1	1223	3	-0.30296	0.98047	0.98552	1	3103	0	-0.30296
NDUFB9	5	0.21039	0.37283	1	1224	2	-0.12827	0.67047	0.7556	1	2318	1	-0.12827
SLC5A12	5	0.21082	0.37406	1	1225	2	0.053646	0.27552	0.4848	1	1398	1	0.053646
ACBD3	5	0.21115	0.37406	1	1226	1	0.21523	0.31753	0.51108	1	1525	2	0.21523
B3GNT5	5	0.21118	0.37406	1	1227	3	-0.27561	0.2129	0.43249	1	1234	1	-0.27561
FUT8	5	0.21165	0.37406	1	1228	2	0.19582	0.12492	0.28989	1	829	3	0.19582
KCTD19	5	0.21179	0.37406	1	1229	3	-0.19513	0.97235	0.97687	1	3077	0	-0.19513
RDH12	5	0.2119	0.37406	1	1230	2	0.10256	0.82949	0.837	1	2626	1	0.10256
CNEP1R1	5	0.21224	0.37406	1	1231	3	-0.20271	0.35396	0.53422	1	1630	2	-0.20271
SLC25A35	5	0.21226	0.37406	1	1232	2	0.0044018	0.079801	0.20968	1	579	2	0.0044018
ABHD14A	5	0.2126	0.37406	1	1233	3	-0.26655	0.85671	0.87191	1	2694	1	-0.26655
NANP	5	0.21261	0.37406	1	1234	2	0.49462	0.10318	0.25071	1	711	3	0.49462
HS3ST3A1	5	0.21278	0.37406	1	1235	3	-0.23322	0.029567	0.092858	1	276	2	-0.23322
CH25H	5	0.21315	0.37538	1	1236	2	0.10191	0.504	0.67803	1	2041	2	0.10191
P2RX5	5	0.21351	0.37538	1	1237	3	-0.36916	0.81039	0.82846	1	2576	1	-0.36916
NAT8L	5	0.21369	0.37538	1	1238	3	-0.34639	0.075815	0.20626	1	553	2	-0.34639
GSTA4	5	0.21391	0.37539	1	1239	2	-0.16914	0.8432	0.85538	1	2663	1	-0.16914
CYP1B1	5	0.21416	0.37539	1	1240	2	0.17457	0.78317	0.8141	1	2513	1	0.17457
ELOVL7	5	0.21441	0.37667	1	1241	1	-0.010433	0.26555	0.46698	1	1375	2	-0.010433
HMGCLL1	5	0.21469	0.37667	1	1242	3	-0.20483	0.41479	0.59575	1	1782	2	-0.20483
DGKD	5	0.21491	0.37667	1	1243	3	-0.25847	0.44426	0.61837	1	1853	1	-0.25847
SLC16A12	5	0.21516	0.37667	1	1244	1	0.26959	0.02544	0.084747	1	249	4	0.26959
CACNG3	5	0.21525	0.37667	1	1245	2	0.34517	0.094245	0.23171	1	657	3	0.34517
SLC43A3	5	0.21541	0.37667	1	1246	1	0.0054268	0.89959	0.91699	1	2843	0	0.0054268
TXNIP	5	0.21578	0.37667	1	1247	3	-0.16106	0.8844	0.89893	1	2795	0	-0.16106
IP6K1	5	0.21616	0.37667	1	1248	1	-0.12467	0.2156	0.43496	1	1241	2	-0.12467
GCK	5	0.21666	0.37667	1	1249	1	0.17749	0.47125	0.63992	1	1938	2	0.17749
SLC25A46	5	0.21696	0.37794	1	1250	3	-0.37686	0.038726	0.11663	1	356	1	-0.37686
SLC25A14	5	0.21704	0.37794	1	1251	2	0.44012	0.045477	0.14281	1	404	3	0.44012
ENOX2	5	0.21716	0.37794	1	1252	1	0.33002	0.01766	0.059623	1	188	4	0.33002
GSTO1	5	0.2174	0.37794	1	1253	2	0.45143	0.032993	0.10123	1	305	3	0.45143
TBXAS1	5	0.21741	0.37794	1	1254	2	0.077352	0.1176	0.27876	1	789	2	0.077352
LPCAT2	5	0.21764	0.37794	1	1255	2	-0.18076	0.40594	0.58691	1	1756	2	-0.18076
TKFC	5	0.21791	0.37794	1	1256	1	0.29557	0.075269	0.20555	1	551	3	0.29557
KDM8	5	0.21812	0.37794	1	1257	2	0.21223	0.17624	0.37377	1	1094	3	0.21223
POR	5	0.21815	0.37794	1	1258	3	-0.27055	0.7948	0.81698	1	2541	1	-0.27055
GAD2	5	0.21816	0.37794	1	1259	2	0.017715	0.53276	0.71029	1	2119	1	0.017715
GRIA2	5	0.21824	0.37794	1	1260	2	-0.015925	0.70976	0.77295	1	2390	1	-0.015925
SLC25A22	5	0.21861	0.37794	1	1261	3	-0.20255	0.46675	0.63382	1	1926	2	-0.20255
CTNS	5	0.2189	0.37794	1	1262	2	0.095707	0.36889	0.55454	1	1667	2	0.095707
POMGNT2	5	0.21915	0.37794	1	1263	2	-0.21859	0.18647	0.38811	1	1141	1	-0.21859
SGPP2	5	0.21916	0.37794	1	1264	3	-0.37622	0.9833	0.98684	1	3113	0	-0.37622
SCNN1D	5	0.21945	0.3793	1	1265	2	-0.11199	0.87736	0.89398	1	2767	0	-0.11199
ABCC10	5	0.21962	0.3793	1	1266	3	-0.28288	0.17819	0.37806	1	1108	1	-0.28288
HTR3B	5	0.21965	0.3793	1	1267	3	-0.18529	0.46169	0.6324	1	1909	1	-0.18529
B4GALT5	5	0.22015	0.3793	1	1268	3	-0.2106	0.60904	0.74301	1	2222	1	-0.2106
NUDT3	5	0.22017	0.3793	1	1269	3	-0.18752	0.92224	0.93262	1	2907	0	-0.18752
HAAO	5	0.22017	0.3793	1	1270	2	-0.25772	0.64808	0.75135	1	2276	1	-0.25772
B3GNT2	5	0.22053	0.3793	1	1271	3	-0.20787	0.9418	0.94633	1	2971	0	-0.20787
PDHB	5	0.22072	0.3793	1	1272	3	-0.20389	0.94729	0.95352	1	2988	0	-0.20389
ALAS2	5	0.22099	0.3793	1	1273	3	-0.18789	0.32786	0.51812	1	1547	2	-0.18789
DAD1	5	0.22189	0.38061	1	1274	2	0.3643	0.07292	0.19332	1	538	3	0.3643
SLC14A1	5	0.22228	0.38061	1	1275	3	-0.17982	0.71459	0.77724	1	2397	1	-0.17982
ASH1L	5	0.22239	0.38061	1	1276	2	-0.25677	0.10704	0.2592	1	734	1	-0.25677
PLA2G7	5	0.2227	0.38061	1	1277	2	0.15106	0.078784	0.20968	1	572	2	0.15106
ALDH2	5	0.22289	0.38061	1	1278	1	0.00294	0.21641	0.43496	1	1245	2	0.00294
CYBB	5	0.22388	0.38061	1	1279	2	0.29433	0.099881	0.23661	1	688	3	0.29433
COX17	5	0.22415	0.38191	1	1280	2	0.055464	0.85282	0.86505	1	2681	1	0.055464
SLC15A2	5	0.22437	0.38192	1	1281	2	0.21497	0.12733	0.29247	1	846	3	0.21497
FAAH	5	0.22439	0.38192	1	1282	2	0.005832	0.36818	0.55232	1	1664	2	0.005832
OSBPL11	5	0.22463	0.38322	1	1283	2	-0.07239	0.093925	0.23171	1	654	2	-0.07239
ACOT4	5	0.22487	0.38322	1	1284	3	-0.23769	0.25583	0.46076	1	1348	1	-0.23769
NDUFA4	5	0.22487	0.38322	1	1285	2	-0.40228	0.88353	0.89776	1	2793	0	-0.40228
TTYH3	5	0.22533	0.38457	1	1286	3	-0.25614	0.87059	0.88464	1	2743	0	-0.25614
SPAM1	5	0.22537	0.38457	1	1287	1	0.21951	0.12384	0.28569	1	821	3	0.21951
AMDHD2	5	0.22552	0.38457	1	1288	3	-0.2626	0.50675	0.68426	1	2049	1	-0.2626
CYB5D1	5	0.22572	0.38457	1	1289	2	-0.10743	0.34051	0.52828	1	1586	2	-0.10743
MTMR6	5	0.22657	0.38457	1	1290	2	0.11265	0.37329	0.55886	1	1681	1	0.11265
HMOX1	5	0.2266	0.38457	1	1291	3	-0.2041	0.98027	0.98551	1	3101	0	-0.2041
GDE1	5	0.22681	0.38457	1	1292	2	0.1417	0.16371	0.34028	1	1033	3	0.1417
RHCG	5	0.22705	0.38457	1	1293	2	-0.012571	0.88494	0.90017	1	2797	0	-0.012571
ADCY2	5	0.2271	0.38457	1	1294	2	0.15754	0.2727	0.47731	1	1392	2	0.15754
HCN4	5	0.22729	0.38457	1	1295	3	-0.17803	0.97209	0.97648	1	3075	0	-0.17803
ALDOC	5	0.22759	0.38457	1	1296	2	0.20722	0.056327	0.15492	1	461	2	0.20722
FPGT	5	0.22766	0.38457	1	1297	2	0.096961	0.12083	0.282	1	805	2	0.096961
KCNV2	5	0.22784	0.38457	1	1298	2	0.40944	0.087605	0.22309	1	618	3	0.40944
SLC6A7	5	0.22814	0.38457	1	1299	2	-0.087762	0.1263	0.29247	1	837	1	-0.087762
OXCT2	5	0.22883	0.38762	1	1300	2	-0.024368	0.23669	0.45046	1	1301	2	-0.024368
SYNJ1	5	0.22915	0.38762	1	1301	3	-0.22608	0.10843	0.26098	1	748	2	-0.22608
FTMT	5	0.23027	0.39053	1	1302	3	-0.23433	0.93328	0.94237	1	2942	0	-0.23433
UGT2B15	5	0.2308	0.39053	1	1303	1	0.20566	0.13193	0.29885	1	870	3	0.20566
SLC16A4	5	0.23093	0.39053	1	1304	3	-0.28024	0.54583	0.71751	1	2136	1	-0.28024
SREBF1	5	0.23118	0.39053	1	1305	2	0.14051	0.7489	0.79021	1	2449	1	0.14051
ST6GAL2	5	0.23129	0.39053	1	1306	2	-0.11913	0.38161	0.5644	1	1707	2	-0.11913
ZC3H12A	5	0.23139	0.39053	1	1307	3	-0.26701	0.37971	0.5644	1	1698	2	-0.26701
GLUD2	5	0.23149	0.39053	1	1308	3	-0.18351	0.2358	0.44789	1	1299	2	-0.18351
SLCO4A1	5	0.23186	0.39054	1	1309	3	-0.19044	0.054225	0.1542	1	450	2	-0.19044
TNFRSF1A	5	0.23203	0.39054	1	1310	2	-0.11125	0.0087648	0.034172	1	108	2	-0.11125
AGXT2	5	0.23227	0.39054	1	1311	2	0.22207	0.12023	0.28103	1	802	3	0.22207
APOA5	5	0.23264	0.39054	1	1312	2	0.13441	0.055386	0.15492	1	455	3	0.13441
ATP11C	5	0.23271	0.39054	1	1313	3	-0.26346	0.33388	0.52081	1	1563	1	-0.26346
SLC22A3	5	0.23326	0.39054	1	1314	2	-0.083504	0.91573	0.93006	1	2885	0	-0.083504
DHRS4L1	5	0.23375	0.39343	1	1315	3	-0.20003	0.47201	0.64134	1	1942	2	-0.20003
CAMKMT	5	0.2341	0.39343	1	1316	2	0.077485	0.18518	0.38418	1	1137	2	0.077485
CHST7	5	0.23422	0.39343	1	1317	2	-0.15819	0.050835	0.1466	1	428	2	-0.15819
GNPTG	5	0.23424	0.39343	1	1318	2	0.16665	0.10315	0.25071	1	710	2	0.16665
DGKB	5	0.23459	0.39343	1	1319	3	-0.22949	0.38223	0.56582	1	1708	1	-0.22949
ARNT	5	0.23507	0.39343	1	1320	2	-0.02343	0.35211	0.53422	1	1622	1	-0.02343
PLA2G4A	5	0.23525	0.39343	1	1321	3	-0.30188	0.81071	0.82846	1	2579	1	-0.30188
SLC25A34	5	0.23571	0.39343	1	1322	1	0.035155	0.8087	0.82846	1	2571	1	0.035155
IRG1	5	0.23593	0.39456	1	1323	3	-0.20805	0.43239	0.61095	1	1827	1	-0.20805
ALG10	5	0.23619	0.39456	1	1324	3	-0.23044	0.98257	0.9863	1	3109	0	-0.23044
SIRT6	5	0.23645	0.39456	1	1325	2	-0.17117	0.68394	0.76575	1	2340	1	-0.17117
LIPC	5	0.23718	0.39456	1	1326	1	0.25755	0.019229	0.070121	1	204	4	0.25755
AGPAT5	5	0.23751	0.39456	1	1327	2	-0.20279	0.23326	0.44788	1	1289	1	-0.20279
INPP5B	5	0.23764	0.39456	1	1328	2	-0.11982	0.68194	0.76359	1	2336	1	-0.11982
ATIC	5	0.23771	0.39456	1	1329	3	-0.20102	0.089425	0.22309	1	627	1	-0.20102
SLC25A19	5	0.23776	0.39456	1	1330	2	-0.0020055	0.43928	0.61373	1	1839	2	-0.0020055
CA12	5	0.23791	0.39456	1	1331	1	-0.1024	0.44331	0.61688	1	1850	1	-0.1024
ATP13A3	5	0.23809	0.39456	1	1332	3	-0.17913	0.72942	0.78305	1	2421	1	-0.17913
HYKK	5	0.23874	0.39869	1	1333	2	-0.044128	0.0056074	0.021567	1	69	2	-0.044128
PCCB	5	0.23894	0.39869	1	1334	3	-0.25267	0.70073	0.76995	1	2372	1	-0.25267
LACC1	5	0.23913	0.39869	1	1335	1	0.53063	0.012032	0.041849	1	141	4	0.53063
GGTLC1	5	0.23923	0.39869	1	1336	2	0.0023842	0.42684	0.60569	1	1813	2	0.0023842
BSND	5	0.23932	0.39869	1	1337	3	-0.21914	0.44786	0.62027	1	1861	1	-0.21914
MFSD3	5	0.23972	0.39869	1	1338	2	-0.096366	0.83221	0.84275	1	2632	1	-0.096366
SLC25A29	5	0.24027	0.39869	1	1339	3	-0.22706	0.8052	0.827	1	2559	1	-0.22706
SLC38A4	5	0.24056	0.3987	1	1340	3	-0.31267	0.33475	0.52081	1	1567	1	-0.31267
SLC26A1	5	0.2406	0.3987	1	1341	1	0.074695	0.25247	0.45816	1	1342	1	0.074695
ACE	5	0.24094	0.3987	1	1342	3	-0.30396	0.83293	0.84564	1	2633	1	-0.30396
GSS	5	0.24109	0.3987	1	1343	2	0.51147	0.026071	0.087053	1	253	3	0.51147
FOXO1	5	0.24122	0.3987	1	1344	3	-0.27209	0.19672	0.4167	1	1184	1	-0.27209
VAT1	5	0.24143	0.3987	1	1345	2	0.11334	0.10059	0.23801	1	696	2	0.11334
CYP2D7	5	0.24218	0.3987	1	1346	3	-0.53345	0.70304	0.76996	1	2378	1	-0.53345
ETFB	5	0.24246	0.3987	1	1347	3	-0.29396	0.32097	0.51108	1	1531	2	-0.29396
CA6	5	0.24279	0.3999	1	1348	1	0.34651	0.020651	0.071721	1	216	4	0.34651
SLC35A3	5	0.24294	0.3999	1	1349	3	-0.2013	0.29683	0.49479	1	1455	2	-0.2013
APOB	5	0.24303	0.3999	1	1350	2	0.30012	0.043544	0.14219	1	392	3	0.30012
TRPM1	5	0.24303	0.3999	1	1351	1	-0.039568	0.52242	0.70286	1	2089	2	-0.039568
SLC29A4	5	0.24376	0.3999	1	1352	2	0.12308	0.48397	0.65261	1	1980	2	0.12308
SLC44A3	5	0.24401	0.3999	1	1353	2	0.010808	0.39418	0.58202	1	1733	2	0.010808
ETNPPL	5	0.24425	0.3999	1	1354	2	0.0031873	0.83496	0.84708	1	2643	1	0.0031873
AKR1C2	5	0.24438	0.40118	1	1355	3	-0.19485	0.16419	0.34139	1	1035	2	-0.19485
PLOD1	5	0.24449	0.40118	1	1356	2	-0.10211	0.35746	0.53784	1	1640	1	-0.10211
ATP5MC3	5	0.24473	0.40118	1	1357	1	0.40303	0.083552	0.21904	1	600	3	0.40303
SLC38A1	5	0.24476	0.40118	1	1358	3	-0.24662	0.35742	0.53784	1	1639	2	-0.24662
ST3GAL2	5	0.24522	0.40118	1	1359	1	0.43442	0.044702	0.14281	1	398	3	0.43442
SRM	5	0.24524	0.40118	1	1360	2	0.0073918	0.019396	0.070124	1	206	2	0.0073918
ASS1	5	0.24548	0.40118	1	1361	2	-0.10118	0.93595	0.94313	1	2950	0	-0.10118
BCO2	5	0.24629	0.40118	1	1362	3	-0.17064	0.19621	0.4167	1	1182	1	-0.17064
SLC22A16	5	0.24639	0.40118	1	1363	3	-0.32135	0.89561	0.90946	1	2832	0	-0.32135
LIAS	5	0.24649	0.40118	1	1364	3	-0.19316	0.95837	0.96533	1	3025	0	-0.19316
GCKR	5	0.2474	0.40248	1	1365	1	0.29461	0.11864	0.27876	1	793	3	0.29461
PDXP	5	0.2488	0.40487	1	1366	3	-0.20763	0.74577	0.79021	1	2443	1	-0.20763
SETDB1	5	0.24881	0.40487	1	1367	2	-0.15612	0.012544	0.043667	1	146	1	-0.15612
SLC35F1	5	0.24906	0.40487	1	1368	2	-0.11504	0.56847	0.72453	1	2165	1	-0.11504
CHRNB4	5	0.24928	0.40487	1	1369	3	-0.18679	0.71769	0.7801	1	2400	1	-0.18679
GLRA1	5	0.24933	0.40487	1	1370	1	0.018018	0.77656	0.8098	1	2498	1	0.018018
NADSYN1	5	0.24942	0.40487	1	1371	3	-0.17996	0.76744	0.80134	1	2479	1	-0.17996
NT5DC3	5	0.24942	0.40487	1	1372	3	-0.27407	0.97252	0.97687	1	3078	0	-0.27407
POMK	5	0.24957	0.40487	1	1373	2	0.089025	0.37113	0.55673	1	1674	2	0.089025
ACP5	5	0.25025	0.40487	1	1374	3	-0.17128	0.17332	0.36364	1	1080	2	-0.17128
DOLPP1	5	0.25044	0.40487	1	1375	3	-0.21261	0.89249	0.9061	1	2822	0	-0.21261
PTS	5	0.25054	0.40487	1	1376	3	-0.18131	0.47113	0.63992	1	1937	2	-0.18131
P2RX2	5	0.25054	0.40487	1	1377	2	0.24892	0.103	0.24988	1	709	3	0.24892
SLC9A2	5	0.25083	0.40487	1	1378	3	-0.2214	0.24011	0.45296	1	1308	1	-0.2214
MECR	5	0.2514	0.40771	1	1379	2	-0.11952	0.65617	0.75276	1	2292	1	-0.11952
GPCPD1	5	0.2515	0.40771	1	1380	3	-0.3271	0.35857	0.53928	1	1645	2	-0.3271
PLCB3	5	0.25199	0.40771	1	1381	1	0.12832	0.0053399	0.020419	1	65	2	0.12832
FCER1A	5	0.25223	0.40899	1	1382	2	0.015905	0.027016	0.087593	1	257	2	0.015905
HPGDS	5	0.25239	0.40899	1	1383	2	-0.2083	0.52544	0.70733	1	2099	1	-0.2083
DHRS4	5	0.25271	0.40899	1	1384	2	-0.045423	0.061565	0.1708	1	484	2	-0.045423
SLC25A23	5	0.25288	0.40899	1	1385	2	0.048615	0.4567	0.62398	1	1888	2	0.048615
MOCS2	5	0.25295	0.40899	1	1386	1	0.081038	0.18595	0.38669	1	1139	2	0.081038
EXTL3	5	0.25296	0.40899	1	1387	3	-0.29063	0.023025	0.077568	1	233	2	-0.29063
ME1	5	0.25367	0.41179	1	1388	1	0.26733	0.11605	0.27776	1	779	3	0.26733
PIP5K1A	5	0.25373	0.41179	1	1389	3	-0.21498	0.73503	0.786	1	2430	1	-0.21498
SLC26A11	5	0.254	0.41179	1	1390	2	-0.21325	0.041372	0.13317	1	375	1	-0.21325
PHF2	5	0.25439	0.41179	1	1391	2	0.32247	0.12165	0.282	1	809	3	0.32247
HTD2	5	0.25462	0.41179	1	1392	3	-0.19706	0.90649	0.92224	1	2861	0	-0.19706
TYMP	5	0.25474	0.41179	1	1393	2	-0.17454	0.45431	0.62398	1	1881	2	-0.17454
GABRA3	5	0.25499	0.41179	1	1394	2	-0.032009	0.51259	0.69369	1	2064	1	-0.032009
KDM4E	5	0.25511	0.41179	1	1395	1	0.30192	0.19257	0.41202	1	1167	3	0.30192
MSRB1	5	0.25573	0.4118	1	1396	3	-0.17295	0.97315	0.97724	1	3081	0	-0.17295
GRID1	5	0.25583	0.4118	1	1397	2	-0.074152	0.87433	0.89004	1	2753	0	-0.074152
GLRX5	5	0.25588	0.4118	1	1398	3	-0.17601	0.96926	0.97532	1	3065	0	-0.17601
PIK3R1	5	0.25598	0.4118	1	1399	2	-0.012643	0.01134	0.0384	1	135	2	-0.012643
SREBF2	5	0.25607	0.4118	1	1400	2	0.16728	0.063244	0.17519	1	490	2	0.16728
GPX1	5	0.25631	0.4118	1	1401	1	0.38089	0.019561	0.07123	1	209	4	0.38089
MMADHC	5	0.25636	0.4118	1	1402	3	-0.17561	0.37933	0.5644	1	1697	1	-0.17561
DDO	5	0.25697	0.41302	1	1403	2	-0.18136	0.35618	0.53553	1	1636	1	-0.18136
SLC26A2	5	0.25719	0.41302	1	1404	3	-0.29334	0.9563	0.96271	1	3016	0	-0.29334
PIGZ	5	0.25747	0.41302	1	1405	2	-0.26849	0.69514	0.76856	1	2361	1	-0.26849
AMPD1	5	0.25823	0.41302	1	1406	2	0.19726	0.0073368	0.024878	1	91	2	0.19726
ND3	5	0.25851	0.41432	1	1407	3	-0.21792	0.49513	0.6736	1	2008	2	-0.21792
ALG9	5	0.25871	0.41432	1	1408	2	0.48579	0.020607	0.071721	1	215	3	0.48579
ASPHD1	5	0.25895	0.41432	1	1409	2	-0.075623	0.97614	0.98143	1	3085	0	-0.075623
KCNH6	5	0.2592	0.41432	1	1410	2	-0.062076	0.024217	0.081936	1	240	2	-0.062076
SCNN1A	5	0.25942	0.41432	1	1411	2	-0.17401	0.8333	0.84564	1	2636	1	-0.17401
CLCN2	5	0.2599	0.41432	1	1412	1	0.025655	0.50006	0.6736	1	2023	2	0.025655
UCP3	5	0.26007	0.41432	1	1413	2	-0.16837	0.1625	0.33501	1	1026	1	-0.16837
FRRS1	5	0.26008	0.41432	1	1414	3	-0.33078	0.27412	0.48347	1	1395	1	-0.33078
LBR	5	0.26028	0.41432	1	1415	3	-0.1742	0.28788	0.49106	1	1432	1	-0.1742
PRPS2	5	0.26037	0.41432	1	1416	3	-0.20304	0.4775	0.64947	1	1956	2	-0.20304
AK5	5	0.26062	0.41562	1	1417	2	-0.053029	0.16196	0.33134	1	1023	2	-0.053029
KCNV1	5	0.26069	0.41563	1	1418	3	-0.16121	0.80813	0.82846	1	2568	1	-0.16121
FABP4	5	0.26085	0.41563	1	1419	2	0.075028	0.031641	0.098094	1	292	2	0.075028
HS3ST2	5	0.26094	0.41681	1	1420	2	-0.16409	0.56458	0.72306	1	2161	1	-0.16409
KCTD2	5	0.26109	0.41681	1	1421	1	0.52697	0.01782	0.059623	1	190	3	0.52697
CACNA2D3	5	0.26136	0.41681	1	1422	3	-0.21716	0.86103	0.87761	1	2709	1	-0.21716
ST3GAL6	5	0.26157	0.41681	1	1423	1	-0.082154	0.81899	0.83267	1	2599	1	-0.082154
FUCA1	5	0.26205	0.41681	1	1424	2	-0.15801	0.6401	0.75135	1	2257	1	-0.15801
PLOD3	5	0.26252	0.41681	1	1425	2	-0.0085301	0.82846	0.837	1	2624	1	-0.0085301
ENPP5	5	0.26268	0.41681	1	1426	2	0.041662	0.33744	0.52081	1	1576	2	0.041662
ST8SIA2	5	0.26324	0.41681	1	1427	1	0.17185	0.18911	0.39312	1	1150	3	0.17185
SLC7A13	5	0.26395	0.41681	1	1428	1	-0.040304	0.36357	0.54647	1	1656	2	-0.040304
ACBD5	5	0.26401	0.41681	1	1429	3	-0.23117	0.90311	0.9202	1	2850	0	-0.23117
RDH13	5	0.26505	0.41681	1	1430	2	-0.16712	0.15083	0.31786	1	964	2	-0.16712
TRPV6	5	0.26561	0.41681	1	1431	2	0.080665	0.34716	0.52967	1	1603	1	0.080665
NUDT2	5	0.26642	0.418	1	1432	2	-0.1116	0.38285	0.56736	1	1710	2	-0.1116
PRDX2	5	0.2668	0.418	1	1433	1	0.34784	0.0001431	0.00089218	0.775813	2	3	0.34784
PKM	5	0.26692	0.418	1	1434	3	-0.39051	0.23178	0.44788	1	1283	1	-0.39051
ITPKA	5	0.26708	0.41924	1	1435	3	-0.2553	0.22239	0.44151	1	1261	1	-0.2553
SLC39A8	5	0.26718	0.41924	1	1436	3	-0.20679	0.47797	0.64947	1	1959	1	-0.20679
TKTL2	5	0.26728	0.41924	1	1437	3	-0.26962	0.46462	0.6324	1	1918	2	-0.26962
NAALAD2	5	0.26747	0.41924	1	1438	3	-0.19161	0.52184	0.70286	1	2087	2	-0.19161
PAM	5	0.26787	0.41924	1	1439	3	-0.21497	0.10815	0.26098	1	744	2	-0.21497
VLDLR	5	0.26893	0.42052	1	1440	1	0.07342	0.12712	0.29247	1	844	2	0.07342
RYR2	5	0.26956	0.42052	1	1441	3	-0.27744	0.41795	0.59787	1	1791	1	-0.27744
AQP1	5	0.27011	0.42052	1	1442	1	0.2385	0.039105	0.11882	1	358	4	0.2385
GABRA5	5	0.27029	0.42052	1	1443	2	-0.025353	0.38016	0.5644	1	1700	1	-0.025353
MGAM	5	0.27058	0.42052	1	1444	1	0.040959	0.432	0.61095	1	1825	1	0.040959
PIGO	5	0.27082	0.42053	1	1445	2	0.21357	0.095666	0.23171	1	665	2	0.21357
PLA2G15	5	0.27085	0.42053	1	1446	3	-0.17468	0.48031	0.65104	1	1966	1	-0.17468
ATP1A2	5	0.27153	0.42053	1	1447	1	0.067868	0.23045	0.44271	1	1278	2	0.067868
CTH	5	0.27165	0.42053	1	1448	3	-0.23307	0.92947	0.94073	1	2931	0	-0.23307
ALPI	5	0.27176	0.42053	1	1449	2	0.32493	0.098128	0.2338	1	677	3	0.32493
PIP4K2A	5	0.27205	0.42053	1	1450	3	-0.16867	0.95667	0.96432	1	3018	0	-0.16867
MFSD4	5	0.27225	0.42053	1	1451	3	-0.16044	0.91997	0.931	1	2897	0	-0.16044
CLIC2	5	0.27305	0.42316	1	1452	3	-0.14252	0.9399	0.94548	1	2964	0	-0.14252
SLC13A4	5	0.27394	0.42586	1	1453	3	-0.19569	0.57556	0.73017	1	2179	1	-0.19569
NSD1	5	0.27494	0.42586	1	1454	3	-0.21813	0.3308	0.52081	1	1554	1	-0.21813
TXNRD2	5	0.27505	0.42587	1	1455	2	0.23355	0.15693	0.32595	1	990	3	0.23355
SSTR4	5	0.27575	0.42587	1	1456	3	-0.21993	0.97139	0.97608	1	3073	0	-0.21993
KCNMB4	5	0.27585	0.42587	1	1457	3	-0.17022	0.7954	0.81981	1	2542	1	-0.17022
ATP13A1	5	0.27655	0.4271	1	1458	3	-0.14861	0.84716	0.85538	1	2671	1	-0.14861
HAL	5	0.2767	0.4271	1	1459	1	0.31553	0.033716	0.10507	1	309	4	0.31553
PPOX	5	0.27693	0.4271	1	1460	1	0.04469	0.77278	0.8071	1	2490	1	0.04469
ABCA2	5	0.27695	0.4271	1	1461	3	-0.15665	0.60746	0.74154	1	2219	1	-0.15665
SUCLG1	5	0.27715	0.4271	1	1462	3	-0.10911	0.89968	0.91699	1	2844	0	-0.10911
GOT2	5	0.27717	0.4271	1	1463	1	0.138	0.63511	0.75135	1	2251	1	0.138
NMNAT2	5	0.27815	0.43119	1	1464	3	-0.2201	0.87645	0.89269	1	2763	0	-0.2201
ALDH1A2	5	0.27846	0.43253	1	1465	3	-0.1269	0.92105	0.9318	1	2900	0	-0.1269
NOX5	5	0.27856	0.43253	1	1466	2	-0.076514	0.31456	0.50864	1	1517	1	-0.076514
BPNT1	5	0.27881	0.43253	1	1467	1	0.27156	0.1002	0.23661	1	691	3	0.27156
MLYCD	5	0.27918	0.43253	1	1468	2	-0.026591	0.094541	0.23171	1	658	2	-0.026591
IYD	5	0.27927	0.43253	1	1469	1	0.50592	0.0073857	0.025071	1	92	4	0.50592
GPAT4	5	0.27997	0.43378	1	1470	2	-0.023548	0.60961	0.74301	1	2224	1	-0.023548
CYP2C9	5	0.28031	0.4351	1	1471	2	0.096089	0.077302	0.20857	1	564	2	0.096089
ALDH5A1	5	0.28044	0.4351	1	1472	2	-0.15047	0.3354	0.52081	1	1571	2	-0.15047
DCTD	5	0.28069	0.4351	1	1473	2	-0.13806	0.66941	0.7556	1	2316	1	-0.13806
DSE	5	0.28082	0.43511	1	1474	2	-0.18207	0.36362	0.54647	1	1657	2	-0.18207
APOF	5	0.28091	0.43511	1	1475	2	0.30477	0.077041	0.20857	1	560	3	0.30477
SLC30A7	5	0.28145	0.43782	1	1476	2	-0.17549	0.64224	0.75135	1	2262	1	-0.17549
C3	5	0.28161	0.43782	1	1477	1	-0.034405	0.48265	0.65104	1	1975	1	-0.034405
CIDEC	5	0.28184	0.43782	1	1478	1	0.092706	0.084623	0.22026	1	604	2	0.092706
SELENBP1	5	0.28207	0.43782	1	1479	2	0.03174	0.37309	0.55886	1	1680	2	0.03174
ST6GALNAC1	5	0.28233	0.43782	1	1480	2	0.006109	0.49142	0.66523	1	1996	2	0.006109
COX6B2	5	0.28333	0.44049	1	1481	2	-0.23721	0.87247	0.88864	1	2747	0	-0.23721
DGKE	5	0.2837	0.44049	1	1482	2	0.028041	0.43205	0.61095	1	1826	2	0.028041
ADK	5	0.28371	0.44049	1	1483	2	-0.14684	0.82502	0.83412	1	2614	1	-0.14684
ND1	5	0.28487	0.443	1	1484	1	-0.0050477	0.40943	0.59098	1	1764	1	-0.0050477
GLT8D1	5	0.28585	0.44553	1	1485	2	0.010963	0.92881	0.93922	1	2930	0	0.010963
ACOT8	5	0.28672	0.44553	1	1486	2	-0.033644	0.030753	0.095965	1	287	1	-0.033644
SLC6A9	5	0.28787	0.44681	1	1487	2	-0.29565	0.97796	0.98366	1	3090	0	-0.29565
ATP2A3	5	0.28788	0.44681	1	1488	2	-0.17383	0.78751	0.81698	1	2525	1	-0.17383
KCTD7	5	0.28812	0.44681	1	1489	2	-0.15495	0.89069	0.90493	1	2815	0	-0.15495
EPHX4	5	0.28858	0.44681	1	1490	1	0.2384	0.17689	0.37378	1	1097	3	0.2384
GUCY1A1	5	0.28888	0.44681	1	1491	2	-0.14683	0.7262	0.7801	1	2417	1	-0.14683
UGT2A1	5	0.289	0.44681	1	1492	2	-0.051017	0.21872	0.43629	1	1252	2	-0.051017
B3GALT2	5	0.28904	0.44681	1	1493	2	-0.12426	0.38326	0.56736	1	1711	1	-0.12426
NDUFV1	5	0.2895	0.44681	1	1494	2	0.16193	0.28006	0.48603	1	1413	2	0.16193
SLC1A7	5	0.29001	0.44814	1	1495	2	0.15687	0.15588	0.32326	1	987	2	0.15687
ACADVL	5	0.29026	0.44814	1	1496	2	-0.014994	0.37288	0.55886	1	1679	2	-0.014994
KCTD18	5	0.29042	0.44814	1	1497	1	0.13148	0.81055	0.82846	1	2578	1	0.13148
KDM1A	5	0.29052	0.44814	1	1498	2	0.070898	0.11506	0.27312	1	773	1	0.070898
MTHFD2L	5	0.29077	0.44814	1	1499	2	0.17899	0.23519	0.44789	1	1294	2	0.17899
XDH	5	0.29135	0.44814	1	1500	1	0.43894	0.10621	0.25409	1	727	3	0.43894
PANK1	5	0.29204	0.45083	1	1501	1	0.3468	0.062191	0.17442	1	486	3	0.3468
SLC39A11	5	0.29254	0.45083	1	1502	2	0.44763	0.017442	0.05962	1	184	3	0.44763
FABP9	5	0.29296	0.45083	1	1503	1	0.21976	0.15363	0.32234	1	981	3	0.21976
XYLT2	5	0.29365	0.45083	1	1504	2	0.0030732	0.49426	0.6702	1	2004	2	0.0030732
HYAL2	5	0.29367	0.45083	1	1505	2	0.28303	0.049595	0.14605	1	422	3	0.28303
NOX1	5	0.29411	0.45083	1	1506	1	0.23188	0.1707	0.36108	1	1065	3	0.23188
PYCR2	5	0.29457	0.45083	1	1507	2	-0.22847	0.66652	0.7556	1	2313	1	-0.22847
SLC25A37	5	0.29468	0.45083	1	1508	2	-0.15116	0.21841	0.43496	1	1250	1	-0.15116
PDE6A	5	0.2948	0.45083	1	1509	1	-0.11794	0.11891	0.27876	1	795	2	-0.11794
SDR42E1	5	0.29506	0.45083	1	1510	2	0.016883	0.43053	0.61095	1	1820	2	0.016883
KYNU	5	0.29532	0.45083	1	1511	2	0.03525	0.43412	0.61234	1	1828	2	0.03525
KCND1	5	0.29582	0.45083	1	1512	2	0.091787	0.14896	0.31644	1	954	2	0.091787
LEPREL2	5	0.29664	0.45218	1	1513	2	0.0020148	0.8229	0.83267	1	2608	1	0.0020148
PDE8B	5	0.29709	0.45218	1	1514	2	0.22571	0.063727	0.17589	1	492	3	0.22571
KCNS1	5	0.29778	0.45218	1	1515	1	0.072347	0.26779	0.46943	1	1382	2	0.072347
CD38	5	0.29801	0.45218	1	1516	2	-0.23158	0.90557	0.92127	1	2857	0	-0.23158
HS3ST3B1	5	0.29847	0.45218	1	1517	1	0.2139	0.14311	0.3112	1	924	3	0.2139
AIFM3	5	0.29861	0.45218	1	1518	2	-0.22035	0.15429	0.32325	1	984	1	-0.22035
PIP5K1B	5	0.29893	0.45218	1	1519	2	0.43589	0.10064	0.23801	1	697	3	0.43589
SLC25A5	5	0.29938	0.45218	1	1520	2	-0.12621	0.89705	0.91167	1	2837	0	-0.12621
SEPHS2	5	0.29949	0.45218	1	1521	2	0.061764	0.060218	0.16039	1	477	2	0.061764
SLC25A45	5	0.3003	0.45218	1	1522	2	-0.13961	0.43911	0.61373	1	1838	2	-0.13961
ETFA	5	0.30098	0.45482	1	1523	1	0.16971	0.20212	0.41917	1	1207	3	0.16971
PIGU	5	0.30144	0.45482	1	1524	2	-0.037249	0.035779	0.10992	1	326	2	-0.037249
KCNJ10	5	0.30166	0.45483	1	1525	2	-0.07822	0.91171	0.92623	1	2877	0	-0.07822
AOC2	5	0.30258	0.4562	1	1526	2	-0.13883	0.45708	0.62398	1	1890	2	-0.13883
NAGK	5	0.30266	0.4562	1	1527	2	0.51597	0.0099801	0.036564	1	120	3	0.51597
NSD2	5	0.3028	0.4562	1	1528	1	-0.14707	0.031345	0.097684	1	290	2	-0.14707
FPGS	5	0.30326	0.45756	1	1529	2	-0.041244	0.71358	0.7758	1	2395	1	-0.041244
KDM4A	5	0.30371	0.45756	1	1530	2	0.088421	0.753	0.79153	1	2458	1	0.088421
GLUL	5	0.30494	0.46025	1	1531	2	-0.16289	0.98047	0.98552	1	3102	0	-0.16289
COX4I1	5	0.30508	0.46025	1	1532	2	0.26791	0.18518	0.38418	1	1136	3	0.26791
CHIA	5	0.3052	0.46025	1	1533	2	-0.063209	0.13904	0.30307	1	910	2	-0.063209
SLC27A1	5	0.3053	0.46025	1	1534	2	0.060573	0.68151	0.76289	1	2334	1	0.060573
BEST3	5	0.30558	0.46025	1	1535	2	0.25497	0.10076	0.23801	1	698	3	0.25497
ATP1B2	5	0.30576	0.46025	1	1536	1	0.19881	0.17716	0.37509	1	1099	3	0.19881
HCN2	5	0.30596	0.46025	1	1537	2	-0.052404	0.92774	0.93848	1	2925	0	-0.052404
PIGP	5	0.30598	0.46025	1	1538	1	0.12901	0.19723	0.41671	1	1186	2	0.12901
AKR1B10	5	0.3071	0.46412	1	1539	2	0.28937	0.053659	0.15303	1	446	3	0.28937
SLC44A2	5	0.30748	0.46412	1	1540	2	-0.21415	0.57418	0.73017	1	2175	1	-0.21415
AK6	5	0.30774	0.46412	1	1541	2	-0.1768	0.30734	0.50467	1	1493	2	-0.1768
HPDL	5	0.30802	0.46412	1	1542	2	-0.17256	0.75011	0.79021	1	2452	1	-0.17256
GSTA1	5	0.30825	0.46412	1	1543	1	0.25659	0.093151	0.23171	1	646	3	0.25659
SQOR	5	0.30977	0.46412	1	1544	2	-0.081574	0.11534	0.27312	1	775	1	-0.081574
MTMR3	5	0.30983	0.46412	1	1545	1	0.07106	0.31779	0.51108	1	1526	2	0.07106
CKMT1B	5	0.31053	0.46412	1	1546	2	0.12608	0.29342	0.49478	1	1446	2	0.12608
PGM1	5	0.31073	0.46412	1	1547	1	0.05346	0.34413	0.52967	1	1596	2	0.05346
PLA2G6	5	0.31096	0.46412	1	1548	1	-0.027546	0.66601	0.7556	1	2312	1	-0.027546
BHMT2	5	0.31119	0.46412	1	1549	2	0.054856	0.42303	0.60569	1	1802	2	0.054856
GABRA4	5	0.31282	0.46412	1	1550	2	-0.11635	0.055967	0.15492	1	459	2	-0.11635
ADA	5	0.31299	0.46412	1	1551	1	-0.095962	0.44155	0.61548	1	1845	2	-0.095962
NFKB1	5	0.31308	0.46412	1	1552	2	0.29393	0.096516	0.23301	1	670	3	0.29393
NSD3	5	0.31344	0.46412	1	1553	2	0.12977	0.83781	0.84838	1	2652	1	0.12977
BSCL2	5	0.31346	0.46412	1	1554	2	0.067782	0.49018	0.66067	1	1995	2	0.067782
PTGS2	5	0.31397	0.46544	1	1555	2	0.045385	0.59109	0.73732	1	2203	1	0.045385
SLC24A3	5	0.31434	0.46544	1	1556	2	-0.074106	0.6826	0.76429	1	2338	1	-0.074106
KDM4D	5	0.31479	0.46544	1	1557	1	-0.028748	0.30089	0.49827	1	1470	2	-0.028748
FAHD1	5	0.31498	0.46544	1	1558	2	-0.27625	0.97028	0.97571	1	3068	0	-0.27625
KCTD12	5	0.31501	0.46544	1	1559	1	0.33062	0.039323	0.11882	1	361	4	0.33062
KCNJ12	5	0.31523	0.46544	1	1560	1	-0.19779	0.57249	0.72881	1	2173	1	-0.19779
AQP9	5	0.31562	0.46544	1	1561	2	-0.23451	0.65423	0.75276	1	2289	1	-0.23451
APOO	5	0.316	0.46544	1	1562	2	0.011904	0.77674	0.81124	1	2499	1	0.011904
PIGQ	5	0.31613	0.46544	1	1563	2	-0.26671	0.77748	0.81124	1	2500	1	-0.26671
UGGT1	5	0.31728	0.46544	1	1564	2	-0.041146	0.60775	0.74154	1	2220	1	-0.041146
ABCB9	5	0.3174	0.46544	1	1565	2	-0.17731	0.5321	0.71029	1	2116	1	-0.17731
TMEM86B	5	0.31815	0.46544	1	1566	2	-0.015178	0.37702	0.56157	1	1690	2	-0.015178
DPM1	5	0.31859	0.46544	1	1567	2	-0.1252	0.96312	0.96936	1	3045	0	-0.1252
KCTD6	5	0.31868	0.46544	1	1568	2	-0.10129	0.9447	0.94938	1	2984	0	-0.10129
GABRE	5	0.31925	0.46544	1	1569	2	0.014768	0.15807	0.32595	1	994	2	0.014768
UGP2	5	0.31971	0.46544	1	1570	1	0.29662	0.056257	0.15492	1	460	3	0.29662
GANC	5	0.31993	0.46544	1	1571	1	0.26512	0.075053	0.20555	1	548	3	0.26512
LPPR5	5	0.32016	0.46674	1	1572	1	0.28996	0.014647	0.047917	1	157	3	0.28996
CACNA1D	5	0.32038	0.46674	1	1573	1	0.3312	0.03147	0.098092	1	291	4	0.3312
SLC12A5	5	0.32135	0.46674	1	1574	2	-0.12618	0.25006	0.45695	1	1335	1	-0.12618
CSAD	5	0.32149	0.46674	1	1575	2	-0.096939	0.0053049	0.020419	1	64	1	-0.096939
ECI1	5	0.32194	0.46674	1	1576	2	-0.097989	0.14745	0.31486	1	947	2	-0.097989
CYP7B1	5	0.32216	0.46674	1	1577	1	0.1856	0.19309	0.41202	1	1171	3	0.1856
LPIN2	5	0.3225	0.46674	1	1578	2	-0.12433	0.58841	0.73591	1	2196	1	-0.12433
CYB5A	5	0.32305	0.46674	1	1579	2	0.015118	0.20146	0.41916	1	1205	2	0.015118
ABCC5	5	0.32314	0.46674	1	1580	2	0.14855	0.04284	0.1416	1	387	2	0.14855
SLC6A6	5	0.32327	0.46675	1	1581	2	-0.29831	0.50928	0.68741	1	2057	2	-0.29831
ABAT	5	0.3235	0.46675	1	1582	2	-0.017305	0.87496	0.89004	1	2755	0	-0.017305
PDE3A	5	0.32378	0.46675	1	1583	2	0.072939	0.78326	0.8141	1	2514	1	0.072939
GGT5	5	0.32416	0.46675	1	1584	2	-0.040649	0.031049	0.096739	1	289	1	-0.040649
GMPPA	5	0.32416	0.46675	1	1585	2	-0.20557	0.29893	0.49709	1	1461	2	-0.20557
NSDHL	5	0.32438	0.46675	1	1586	2	-0.064194	0.16933	0.35864	1	1059	2	-0.064194
P2RX1	5	0.32461	0.46675	1	1587	1	0.35498	0.086436	0.22309	1	613	3	0.35498
KCNK1	5	0.32549	0.46675	1	1588	1	0.10117	0.4229	0.60569	1	1801	2	0.10117
ST3GAL3	5	0.32572	0.46675	1	1589	2	-0.12338	0.38099	0.5644	1	1705	1	-0.12338
CUBN	5	0.32582	0.46675	1	1590	2	-0.14417	0.36065	0.54067	1	1650	2	-0.14417
SLC25A1	5	0.32594	0.46675	1	1591	2	-0.0061355	0.24643	0.45695	1	1326	1	-0.0061355
TCN1	5	0.3266	0.46808	1	1592	2	0.13765	0.1828	0.38162	1	1130	3	0.13765
SLC24A2	5	0.32671	0.46808	1	1593	2	-0.10593	0.83126	0.83972	1	2631	1	-0.10593
SLC39A9	5	0.32824	0.46951	1	1594	2	-0.060482	0.95334	0.95976	1	3010	0	-0.060482
PHOSPHO2	5	0.32837	0.46951	1	1595	2	-0.058739	0.61559	0.74432	1	2230	1	-0.058739
GLO1	5	0.32881	0.46951	1	1596	2	-0.21066	0.49314	0.66523	1	1999	1	-0.21066
GALNT11	5	0.32939	0.46951	1	1597	2	0.015656	0.74435	0.79021	1	2442	1	0.015656
APOA4	5	0.32952	0.46951	1	1598	2	0.71391	0.0011853	0.0052583	1	16	3	0.71391
AQP2	5	0.32965	0.46951	1	1599	2	0.032674	0.64318	0.75135	1	2266	1	0.032674
SLC25A30	5	0.33036	0.46951	1	1600	1	-0.081191	0.54825	0.71751	1	2139	1	-0.081191
SHMT2	5	0.33054	0.46951	1	1601	2	-0.12898	0.40182	0.5869	1	1746	2	-0.12898
MAN2B2	5	0.33058	0.46951	1	1602	2	-0.044194	0.77297	0.8071	1	2491	1	-0.044194
SLC16A2	5	0.3308	0.47087	1	1603	2	0.016437	0.47634	0.64947	1	1953	1	0.016437
PDK4	5	0.3308	0.47087	1	1604	1	-0.0038473	0.66144	0.75415	1	2302	1	-0.0038473
CYP4B1	5	0.33182	0.47087	1	1605	2	-0.073059	0.021386	0.07337	1	225	2	-0.073059
SLC35A2	5	0.33195	0.47087	1	1606	2	0.087881	0.47779	0.64947	1	1958	1	0.087881
CNGB3	5	0.33234	0.47088	1	1607	2	0.015725	0.45695	0.62398	1	1889	2	0.015725
MINA	5	0.33284	0.47088	1	1608	2	0.001109	0.25449	0.46076	1	1345	2	0.001109
INPP5E	5	0.33323	0.47088	1	1609	2	0.15453	0.27831	0.48603	1	1407	2	0.15453
STEAP4	5	0.33453	0.47644	1	1610	2	0.14005	0.83315	0.84564	1	2634	1	0.14005
PLCXD3	5	0.33475	0.47644	1	1611	2	0.19301	0.13455	0.30074	1	887	3	0.19301
STARD4	5	0.33565	0.47894	1	1612	2	0.050294	0.65044	0.75135	1	2280	1	0.050294
CLCN4	5	0.33578	0.47894	1	1613	2	-0.070751	0.10538	0.25159	1	723	1	-0.070751
MOGAT1	5	0.33673	0.47894	1	1614	1	0.038929	0.0083262	0.032764	1	104	1	0.038929
POFUT1	5	0.3368	0.47894	1	1615	2	0.0014286	0.49932	0.6736	1	2021	2	0.0014286
PGAM4	5	0.33732	0.47894	1	1616	2	-0.0082865	0.58871	0.73591	1	2198	1	-0.0082865
PDE6B	5	0.3376	0.47894	1	1617	2	-0.028365	0.70829	0.77137	1	2387	1	-0.028365
VKORC1	5	0.33783	0.47894	1	1618	2	0.017239	0.15349	0.32234	1	979	2	0.017239
ABHD10	5	0.33796	0.47894	1	1619	2	0.31948	0.12037	0.28103	1	803	3	0.31948
C1GALT1C1L	5	0.33891	0.4804	1	1620	1	-0.0858	0.18981	0.3985	1	1154	1	-0.0858
HSD17B8	5	0.34013	0.4804	1	1621	2	-0.14083	0.82779	0.83565	1	2622	1	-0.14083
SLC37A4	5	0.34022	0.4804	1	1622	1	0.62415	0.0040098	0.017068	1	51	3	0.62415
PEDS1	5	0.34065	0.4804	1	1623	2	-0.084164	0.23057	0.44271	1	1280	2	-0.084164
ACSS2	5	0.34077	0.4804	1	1624	2	0.27775	0.14196	0.3088	1	920	3	0.27775
HACD4	5	0.34115	0.4804	1	1625	2	0.070207	0.51413	0.69521	1	2069	1	0.070207
PTGDS	5	0.34174	0.4804	1	1626	2	0.24071	0.0049974	0.020208	1	59	3	0.24071
ARSD	5	0.34179	0.4804	1	1627	2	0.11301	0.15986	0.33028	1	1002	2	0.11301
KDM5B	5	0.34196	0.4804	1	1628	2	0.086601	0.78424	0.8141	1	2516	1	0.086601
DLD	5	0.34218	0.4804	1	1629	2	0.087374	0.57018	0.7274	1	2169	1	0.087374
MAN2A1	5	0.34239	0.4804	1	1630	1	0.25279	0.024312	0.081936	1	242	4	0.25279
SLC22A18	5	0.34282	0.4804	1	1631	2	0.041042	0.1527	0.32085	1	976	2	0.041042
STT3A	5	0.34304	0.4804	1	1632	2	0.069935	0.19263	0.41202	1	1168	2	0.069935
MTHFD1L	5	0.3437	0.4804	1	1633	1	0.24004	0.12176	0.282	1	810	3	0.24004
ENTPD8	5	0.34397	0.4804	1	1634	2	-0.1488	0.020338	0.071233	1	214	2	-0.1488
ACOT11	5	0.34478	0.48188	1	1635	2	-0.12539	0.85024	0.85935	1	2676	1	-0.12539
COX4I2	5	0.34512	0.48188	1	1636	2	0.15332	0.17558	0.3725	1	1091	3	0.15332
INPP5D	5	0.34589	0.48188	1	1637	2	-0.05387	0.14691	0.31486	1	944	2	-0.05387
BLVRA	5	0.34691	0.48188	1	1638	2	-0.13981	0.55162	0.71751	1	2141	1	-0.13981
ATP5F1C	5	0.34694	0.48188	1	1639	1	0.45921	0.0077672	0.032455	1	101	4	0.45921
ACADM	5	0.34759	0.48189	1	1640	1	0.043087	0.22413	0.44271	1	1267	1	0.043087
PPARG	5	0.34768	0.48189	1	1641	2	-0.010134	0.30698	0.50467	1	1491	2	-0.010134
ATP6V0C	5	0.34807	0.48189	1	1642	2	0.097945	0.22017	0.43629	1	1257	2	0.097945
ASIC3	5	0.34824	0.48189	1	1643	2	-0.066734	0.67748	0.75854	1	2330	1	-0.066734
ABHD3	5	0.34845	0.48189	1	1644	2	0.0213	0.12875	0.29417	1	854	2	0.0213
GALNT3	5	0.34858	0.48189	1	1645	2	0.28105	0.13012	0.29417	1	863	3	0.28105
PGM2L1	5	0.34896	0.48189	1	1646	2	0.086578	0.22932	0.44271	1	1275	2	0.086578
LCAT	5	0.3491	0.48189	1	1647	2	-0.034499	0.8685	0.88039	1	2736	0	-0.034499
SLC8A1	5	0.34953	0.48189	1	1648	2	-0.25341	0.77472	0.8098	1	2496	1	-0.25341
MPC1	5	0.35011	0.48189	1	1649	2	-0.12733	0.086885	0.22309	1	615	2	-0.12733
ABCA3	5	0.35018	0.48189	1	1650	1	0.09635	0.31028	0.50863	1	1504	2	0.09635
SLCO2A1	5	0.35039	0.48189	1	1651	2	-0.0051853	0.3758	0.56157	1	1686	1	-0.0051853
SLC13A1	5	0.35165	0.48467	1	1652	2	0.0008977	0.11009	0.26277	1	758	1	0.0008977
MDH2	5	0.35254	0.48467	1	1653	1	0.15483	0.17298	0.36364	1	1077	2	0.15483
GABRD	5	0.35255	0.48467	1	1654	2	-0.073332	0.37057	0.55673	1	1673	1	-0.073332
GPT	5	0.35318	0.48621	1	1655	1	-0.10277	0.12721	0.29247	1	845	2	-0.10277
ABCG8	5	0.35389	0.48776	1	1656	2	0.0032282	0.48968	0.65896	1	1994	2	0.0032282
CRAT	5	0.35409	0.48776	1	1657	2	0.57764	0.011546	0.039262	1	137	3	0.57764
PHGDH	5	0.35447	0.48776	1	1658	2	0.39239	0.046328	0.14383	1	408	3	0.39239
ABCF2	5	0.3546	0.48776	1	1659	2	0.17938	0.18001	0.37944	1	1116	2	0.17938
NT5C1B	5	0.35468	0.48776	1	1660	1	0.077862	0.76094	0.79849	1	2470	1	0.077862
IMPDH1	5	0.35485	0.48776	1	1661	2	0.09305	0.4356	0.61234	1	1832	2	0.09305
GABRB2	5	0.35511	0.48776	1	1662	2	0.082196	0.49525	0.6736	1	2009	2	0.082196
KCNH1	5	0.35562	0.48776	1	1663	2	-0.096891	0.62079	0.74574	1	2236	1	-0.096891
BCAT2	5	0.35613	0.48776	1	1664	2	-0.17442	0.13228	0.29886	1	872	1	-0.17442
PIGS	5	0.35618	0.48776	1	1665	2	0.18481	0.18714	0.38937	1	1144	3	0.18481
ABCG5	5	0.35661	0.48776	1	1666	2	0.036935	0.30964	0.50863	1	1500	2	0.036935
NAA40	5	0.3569	0.48776	1	1667	2	0.11448	0.0089005	0.03452	1	109	2	0.11448
NT5M	5	0.35767	0.48929	1	1668	2	0.3617	0.065543	0.18254	1	500	3	0.3617
LIPG	5	0.35767	0.48929	1	1669	1	0.028816	0.35613	0.53553	1	1635	2	0.028816
PIGK	5	0.35831	0.49233	1	1670	1	0.15828	0.45796	0.62543	1	1894	2	0.15828
AOC1	5	0.35895	0.49233	1	1671	2	-0.0010004	0.27646	0.4848	1	1402	2	-0.0010004
NUDT15	5	0.35921	0.49386	1	1672	2	0.18436	0.4578	0.62398	1	1893	1	0.18436
CES2	5	0.36001	0.49386	1	1673	1	0.15819	0.060771	0.16471	1	482	2	0.15819
AKR7A3	5	0.36011	0.49386	1	1674	2	-0.068232	0.53868	0.71461	1	2127	1	-0.068232
PGLS	5	0.36023	0.49386	1	1675	2	-0.32982	0.82615	0.83565	1	2619	1	-0.32982
B3GLCT	5	0.36044	0.49386	1	1676	2	0.0036477	0.40428	0.5869	1	1751	2	0.0036477
TRPV4	5	0.36065	0.49386	1	1677	2	0.030764	0.034303	0.10731	1	313	1	0.030764
ATP5S	5	0.36113	0.49386	1	1678	2	0.13999	0.085807	0.22309	1	610	2	0.13999
ISCA1	5	0.36129	0.49386	1	1679	1	-0.097985	0.70338	0.76996	1	2379	1	-0.097985
DBI	5	0.36214	0.49387	1	1680	1	-0.091981	0.011039	0.037878	1	132	1	-0.091981
UAP1	5	0.36256	0.49387	1	1681	1	0.23242	0.49846	0.6736	1	2019	2	0.23242
TAFAZZIN	5	0.36305	0.49387	1	1682	2	-0.11764	0.5199	0.70286	1	2080	1	-0.11764
ACOT12	5	0.36468	0.49533	1	1683	1	0.029162	0.32901	0.51812	1	1550	2	0.029162
SLC5A11	5	0.36472	0.49533	1	1684	2	-0.037557	0.51197	0.69197	1	2062	2	-0.037557
ACMSD	5	0.3651	0.49533	1	1685	2	-0.16017	0.88537	0.90017	1	2799	0	-0.16017
ST3GAL4	5	0.36552	0.49533	1	1686	1	0.2939	0.095715	0.23171	1	666	3	0.2939
PPT1	5	0.36562	0.49533	1	1687	2	-0.021508	0.15933	0.33028	1	1001	2	-0.021508
CHRNA5	5	0.36616	0.49754	1	1688	2	0.029477	0.45607	0.62398	1	1886	2	0.029477
B3GALT5	5	0.36658	0.49989	1	1689	2	-0.12876	0.037064	0.11298	1	341	2	-0.12876
SLC2A13	5	0.36679	0.5014	1	1690	1	0.094123	0.36997	0.55672	1	1672	2	0.094123
FBP1	5	0.36721	0.5014	1	1691	2	-0.086207	0.68958	0.76855	1	2350	1	-0.086207
SLC34A3	5	0.36741	0.5014	1	1692	2	-0.13151	0.14683	0.31486	1	943	2	-0.13151
INSIG2	5	0.36767	0.5014	1	1693	2	-0.004829	0.21741	0.43496	1	1247	1	-0.004829
RHAG	5	0.36792	0.5014	1	1694	2	-0.16406	0.20928	0.42715	1	1225	2	-0.16406
PRDM6	5	0.36818	0.5014	1	1695	2	-0.10438	0.79879	0.82131	1	2547	1	-0.10438
MPP1	5	0.36826	0.5014	1	1696	2	0.12611	0.80716	0.827	1	2565	1	0.12611
CDO1	5	0.36857	0.5014	1	1697	2	-0.1275	0.85901	0.87611	1	2702	1	-0.1275
AK9	5	0.36908	0.50359	1	1698	2	-0.11613	0.36229	0.54647	1	1653	2	-0.11613
DHCR7	5	0.36952	0.50359	1	1699	1	0.28459	0.13617	0.30171	1	896	3	0.28459
KCND3	5	0.36973	0.50359	1	1700	2	-0.35825	0.9222	0.93262	1	2906	0	-0.35825
KCTD16	5	0.37036	0.50359	1	1701	2	-0.27395	0.014347	0.047636	1	155	1	-0.27395
NAT2	5	0.37036	0.50359	1	1702	2	-0.01871	0.93636	0.94313	1	2952	0	-0.01871
SLC25A12	5	0.37049	0.50359	1	1703	2	0.16223	0.4785	0.64947	1	1962	2	0.16223
CYP8B1	5	0.37057	0.50359	1	1704	1	0.022646	0.032233	0.10026	1	296	1	0.022646
B3GALNT1	5	0.37074	0.50359	1	1705	2	-0.11314	0.45369	0.62398	1	1879	1	-0.11314
SLC22A15	5	0.37151	0.50359	1	1706	2	-0.087697	0.91989	0.931	1	2896	0	-0.087697
COX7A2	5	0.37162	0.50359	1	1707	2	0.13397	0.14039	0.3088	1	914	2	0.13397
STARD6	5	0.37203	0.50584	1	1708	2	-0.17936	0.94769	0.95352	1	2990	0	-0.17936
SLC35D2	5	0.37246	0.50584	1	1709	1	0.49487	0.036534	0.11081	1	336	3	0.49487
ABCB5	5	0.37292	0.50802	1	1710	2	-0.17515	0.57724	0.73153	1	2180	1	-0.17515
A1CF	5	0.37329	0.50802	1	1711	2	0.083695	0.38509	0.56736	1	1716	2	0.083695
NPR3	5	0.3735	0.50802	1	1712	2	0.046358	0.80894	0.82846	1	2573	1	0.046358
CYP2A7	5	0.37371	0.50802	1	1713	2	-0.088313	0.48121	0.65104	1	1969	1	-0.088313
LDLR	5	0.37413	0.50802	1	1714	2	0.060412	0.81469	0.83127	1	2587	1	0.060412
PCYT1A	5	0.37434	0.50955	1	1715	2	0.0043634	0.854	0.86923	1	2685	1	0.0043634
GK2	5	0.37446	0.50955	1	1716	2	-0.24645	0.254	0.46075	1	1344	2	-0.24645
SLC9A7	5	0.37476	0.51101	1	1717	2	0.31494	0.12106	0.282	1	806	3	0.31494
KCNJ5	5	0.3751	0.51101	1	1718	2	0.030785	0.31155	0.50863	1	1506	2	0.030785
FN3K	5	0.37561	0.51101	1	1719	2	-0.028429	0.17343	0.36364	1	1081	2	-0.028429
LPPR4	5	0.3758	0.51101	1	1720	1	0.21393	0.478	0.64947	1	1960	2	0.21393
ALG2	5	0.37642	0.51101	1	1721	1	-0.089483	0.17377	0.36496	1	1084	2	-0.089483
UTY	5	0.37677	0.51101	1	1722	2	0.19524	0.14736	0.31486	1	946	3	0.19524
PPCS	5	0.37715	0.51101	1	1723	2	0.1352	0.11962	0.28002	1	801	2	0.1352
ABCF3	5	0.37809	0.51101	1	1724	1	0.034211	0.36235	0.54647	1	1654	1	0.034211
MICAL1	5	0.37954	0.5131	1	1725	2	-0.12837	0.46594	0.63382	1	1922	1	-0.12837
P2RX4	5	0.37975	0.5131	1	1726	2	-0.21681	0.19816	0.41671	1	1193	2	-0.21681
GALNT15	5	0.37996	0.5131	1	1727	2	-0.13623	0.3464	0.52967	1	1602	2	-0.13623
CACNA2D1	5	0.3801	0.5131	1	1728	2	0.48875	0.082526	0.21633	1	593	3	0.48875
ASIC2	5	0.38035	0.5131	1	1729	2	-0.13913	0.9544	0.96043	1	3014	0	-0.13913
PIK3C2A	5	0.38058	0.5131	1	1730	1	-0.0088033	0.41793	0.59787	1	1790	2	-0.0088033
ADCY9	5	0.3824	0.51311	1	1731	2	0.034973	0.41411	0.59575	1	1779	2	0.034973
ENTPD5	5	0.38347	0.5162	1	1732	1	-0.026063	0.31523	0.50864	1	1520	1	-0.026063
EHMT2	5	0.38368	0.5162	1	1733	2	0.062311	0.1447	0.31264	1	932	2	0.062311
IFI30	5	0.38388	0.5162	1	1734	1	0.40559	0.037029	0.11298	1	339	4	0.40559
ASPDH	5	0.38471	0.5162	1	1735	1	0.4423	0.051408	0.1466	1	433	3	0.4423
TMLHE	5	0.38484	0.5162	1	1736	2	-0.096288	0.93703	0.94477	1	2954	0	-0.096288
NMRAL1	5	0.38491	0.5162	1	1737	1	0.22474	0.25889	0.462	1	1358	2	0.22474
UGT8	5	0.38533	0.51778	1	1738	2	0.27943	0.045227	0.14281	1	402	3	0.27943
HEPH	5	0.38553	0.51936	1	1739	2	-0.12572	0.2938	0.49478	1	1447	2	-0.12572
PIK3CD	5	0.38573	0.51936	1	1740	2	0.010146	0.46775	0.63382	1	1930	2	0.010146
NT5C1A	5	0.3865	0.51936	1	1741	2	-0.0048183	0.86358	0.87901	1	2721	1	-0.0048183
ATP2B4	5	0.38656	0.51936	1	1742	1	0.80613	0.0053792	0.020419	1	66	3	0.80613
ACOT7	5	0.38738	0.51936	1	1743	1	0.50367	0.0021592	0.0095361	1	31	3	0.50367
DUS1L	5	0.38804	0.52166	1	1744	2	-0.12783	0.59934	0.74003	1	2211	1	-0.12783
NAGLU	5	0.38861	0.52166	1	1745	2	0.10202	0.002946	0.013432	1	35	2	0.10202
SETDB2	5	0.39009	0.52321	1	1746	2	0.27245	0.18723	0.38937	1	1145	3	0.27245
CYB561	5	0.39045	0.52321	1	1747	2	0.10204	0.45012	0.62208	1	1869	2	0.10204
HSD3B7	5	0.3906	0.52321	1	1748	2	-0.061501	0.072101	0.19127	1	534	2	-0.061501
PTEN	5	0.39086	0.52485	1	1749	1	-0.038257	0.42188	0.60414	1	1799	2	-0.038257
CS	5	0.39107	0.52485	1	1750	2	-0.14009	0.9444	0.94938	1	2980	0	-0.14009
UGT1A1	5	0.39137	0.52485	1	1751	2	0.089825	0.31006	0.50863	1	1502	1	0.089825
PNLIPRP3	5	0.39162	0.52485	1	1752	2	-0.1251	0.86351	0.87901	1	2720	1	-0.1251
SLC22A2	5	0.39175	0.52485	1	1753	2	-0.017958	0.35063	0.53421	1	1619	2	-0.017958
IDH1	5	0.39188	0.52485	1	1754	2	-0.047449	0.4509	0.62208	1	1871	2	-0.047449
INSIG1	5	0.39201	0.52485	1	1755	2	-0.12158	0.97664	0.98238	1	3087	0	-0.12158
ACHE	5	0.3925	0.52485	1	1756	1	-0.087272	0.21616	0.43496	1	1244	1	-0.087272
KCNG3	5	0.39265	0.52485	1	1757	2	-0.05354	0.64077	0.75135	1	2258	1	-0.05354
SLC46A3	5	0.39311	0.52485	1	1758	1	0.16657	0.11609	0.27776	1	780	3	0.16657
B4GALT3	5	0.39316	0.52485	1	1759	2	-0.12731	0.024812	0.083432	1	247	1	-0.12731
SDHA	5	0.39331	0.52485	1	1760	1	-0.079439	0.92526	0.93524	1	2917	0	-0.079439
SLC17A7	5	0.39372	0.52651	1	1761	1	0.26549	0.16098	0.33028	1	1014	3	0.26549
NUDT12	5	0.39433	0.52651	1	1762	1	0.41782	0.15137	0.31938	1	969	3	0.41782
PIP4K2C	5	0.39444	0.52651	1	1763	2	0.18541	0.42621	0.60569	1	1811	2	0.18541
TNF	5	0.39473	0.52814	1	1764	1	0.32171	0.095653	0.23171	1	664	3	0.32171
PGM5	5	0.39494	0.52814	1	1765	1	0.015274	0.17742	0.37509	1	1101	2	0.015274
SLC17A2	5	0.39508	0.52814	1	1766	2	0.10084	0.56536	0.72306	1	2163	1	0.10084
PYGM	5	0.39575	0.52814	1	1767	1	0.22496	0.026687	0.087056	1	255	4	0.22496
VAT1L	5	0.39656	0.52814	1	1768	1	0.1337	0.30121	0.4995	1	1472	2	0.1337
TCIRG1	5	0.39661	0.52814	1	1769	2	-0.15705	0.44282	0.61688	1	1849	2	-0.15705
SLC26A10	5	0.39687	0.5302	1	1770	2	-0.14691	0.27435	0.48347	1	1396	2	-0.14691
CLIC6	5	0.39879	0.5302	1	1771	1	0.063876	0.31702	0.51108	1	1524	2	0.063876
ACLY	5	0.39917	0.5302	1	1772	2	-0.098043	0.089706	0.2251	1	629	2	-0.098043
ATP11A	5	0.39919	0.5302	1	1773	1	0.35661	0.13691	0.30307	1	900	3	0.35661
SLC33A1	5	0.3994	0.5302	1	1774	1	0.15398	0.15159	0.31938	1	970	2	0.15398
HAS2	5	0.3998	0.5302	1	1775	2	-0.16522	0.13255	0.29886	1	874	1	-0.16522
FCSK	5	0.4	0.5302	1	1776	1	0.092429	0.44548	0.61837	1	1855	2	0.092429
LPCAT1	5	0.40041	0.5302	1	1777	2	0.46588	0.021326	0.07277	1	224	3	0.46588
CHAC1	5	0.40109	0.5302	1	1778	2	-0.34462	0.68418	0.76716	1	2341	1	-0.34462
ETHE1	5	0.40162	0.53175	1	1779	1	0.064684	0.037843	0.11452	1	347	2	0.064684
PIGH	5	0.40182	0.53175	1	1780	2	0.15131	0.2514	0.45816	1	1339	2	0.15131
TRPV5	5	0.40242	0.53328	1	1781	1	0.079389	0.67104	0.7556	1	2320	1	0.079389
GLYAT	5	0.4039	0.53328	1	1782	2	-0.11104	0.062043	0.17442	1	485	1	-0.11104
ACOX2	5	0.40423	0.53328	1	1783	2	0.11657	0.50572	0.68268	1	2043	2	0.11657
IPMK	5	0.40428	0.53328	1	1784	2	-0.068496	0.31344	0.50864	1	1514	2	-0.068496
MTHFR	5	0.40466	0.53328	1	1785	2	-0.19519	0.33757	0.52081	1	1577	2	-0.19519
SLC7A14	5	0.40543	0.53328	1	1786	1	0.39316	0.049084	0.14605	1	418	3	0.39316
PLPP1	5	0.40633	0.53531	1	1787	2	-0.11535	0.29393	0.49478	1	1448	2	-0.11535
ACSL3	5	0.40723	0.53531	1	1788	1	0.35607	0.06435	0.18031	1	495	3	0.35607
ACY3	5	0.40735	0.53531	1	1789	2	-0.075857	0.82972	0.837	1	2627	1	-0.075857
SLC31A1	5	0.40747	0.53531	1	1790	2	-0.15833	0.36626	0.54929	1	1661	2	-0.15833
KCNJ2	5	0.40763	0.53531	1	1791	1	0.49094	0.015946	0.052602	1	170	3	0.49094
NMRK1	5	0.40811	0.53531	1	1792	2	-0.0096026	0.3341	0.52081	1	1564	1	-0.0096026
UCK1	5	0.4085	0.53531	1	1793	2	-0.16753	0.16775	0.35114	1	1053	1	-0.16753
DHRS1	5	0.40888	0.53531	1	1794	2	-0.18029	0.66246	0.75415	1	2304	1	-0.18029
CYP4F11	5	0.40964	0.53531	1	1795	2	-0.015986	0.68814	0.76855	1	2348	1	-0.015986
SLCO4C1	5	0.4099	0.53531	1	1796	2	0.29154	0.12183	0.282	1	811	3	0.29154
TPO	5	0.41003	0.53531	1	1797	2	0.29198	0.098753	0.2338	1	680	3	0.29198
SLC16A13	5	0.41016	0.53531	1	1798	2	0.22825	0.14515	0.31383	1	934	3	0.22825
CTPS1	5	0.41028	0.53531	1	1799	2	-0.21998	0.65123	0.75276	1	2283	1	-0.21998
LPGAT1	5	0.41043	0.53531	1	1800	1	-0.04205	0.019142	0.069248	1	203	2	-0.04205
GRIA4	5	0.41054	0.53531	1	1801	2	0.16857	0.11319	0.266	1	766	2	0.16857
GAPDH	5	0.41082	0.53531	1	1802	2	0.14292	0.49451	0.6702	1	2005	2	0.14292
EPRS1	5	0.41122	0.53531	1	1803	2	0.11587	0.00075923	0.0033155	1	12	2	0.11587
NDUFS6	5	0.41156	0.53531	1	1804	2	-0.039812	0.1934	0.41202	1	1173	2	-0.039812
NEU2	5	0.41169	0.53743	1	1805	2	-0.01979	0.91105	0.92623	1	2875	0	-0.01979
AKR7L	5	0.41301	0.54171	1	1806	2	-0.12668	0.9422	0.94714	1	2972	0	-0.12668
PON3	5	0.41322	0.54171	1	1807	2	-0.029281	0.64198	0.75135	1	2260	1	-0.029281
ENPP3	5	0.41334	0.54171	1	1808	2	-0.016158	0.39188	0.57649	1	1729	2	-0.016158
SLC12A7	5	0.41411	0.54496	1	1809	2	-0.33167	0.21866	0.43629	1	1251	1	-0.33167
C1GALT1C1	5	0.415	0.54496	1	1810	2	-0.16997	0.85243	0.8637	1	2680	1	-0.16997
RDH5	5	0.41637	0.54496	1	1811	2	-0.18744	0.45481	0.62398	1	1882	2	-0.18744
ALLC	5	0.4164	0.54496	1	1812	2	0.33128	0.042092	0.14091	1	379	3	0.33128
PTGR2	5	0.41704	0.54496	1	1813	2	-0.022385	0.8179	0.83267	1	2595	1	-0.022385
RBKS	5	0.41742	0.54496	1	1814	2	0.21326	0.27082	0.47067	1	1389	2	0.21326
NUDT10	5	0.41793	0.54496	1	1815	2	-0.015745	0.39575	0.58202	1	1736	1	-0.015745
GGT7	5	0.41795	0.54496	1	1816	2	-0.13047	0.22858	0.44271	1	1274	1	-0.13047
SULT1C3	5	0.41874	0.54496	1	1817	2	-0.13592	0.61981	0.74574	1	2234	1	-0.13592
SLC18A1	5	0.41953	0.54496	1	1818	1	0.2159	0.03942	0.11882	1	362	3	0.2159
HS3ST6	5	0.41984	0.54496	1	1819	2	-0.28422	0.84783	0.85538	1	2672	1	-0.28422
FOLR3	5	0.41997	0.54496	1	1820	2	-0.21578	0.89837	0.91379	1	2839	0	-0.21578
B4GALT1	5	0.42012	0.54496	1	1821	2	0.25404	0.20399	0.42041	1	1214	3	0.25404
PDHX	5	0.42031	0.54496	1	1822	1	0.22792	0.12761	0.29247	1	848	3	0.22792
UGT3A2	5	0.42048	0.54496	1	1823	2	0.14122	0.11339	0.26691	1	767	2	0.14122
AQP12B	5	0.4209	0.54496	1	1824	1	0.066116	0.31015	0.50863	1	1503	2	0.066116
ECHS1	5	0.4211	0.54496	1	1825	1	-0.15714	0.69431	0.76856	1	2358	1	-0.15714
ALOX5AP	5	0.42129	0.54496	1	1826	2	-0.064736	0.016214	0.054272	1	173	2	-0.064736
DGKH	5	0.42149	0.54496	1	1827	1	0.22205	0.11314	0.266	1	765	3	0.22205
GCSH	5	0.42188	0.5467	1	1828	2	-0.023882	0.43065	0.61095	1	1821	1	-0.023882
PTGES	5	0.42226	0.54836	1	1829	2	-0.27935	0.14763	0.31486	1	948	2	-0.27935
SLC27A5	5	0.42227	0.54836	1	1830	2	-0.018343	0.20761	0.42715	1	1219	2	-0.018343
DIO1	5	0.42277	0.55042	1	1831	2	-0.11502	0.37882	0.5644	1	1695	2	-0.11502
ABHD8	5	0.42328	0.55042	1	1832	2	0.26243	0.073233	0.19402	1	540	3	0.26243
COQ3	5	0.42423	0.55042	1	1833	2	-0.17546	0.46549	0.63382	1	1921	2	-0.17546
SLC39A7	5	0.42443	0.55042	1	1834	2	-0.18246	0.91723	0.931	1	2889	0	-0.18246
CLCN7	5	0.42443	0.55042	1	1835	2	-0.052483	0.88276	0.89776	1	2790	0	-0.052483
SLC12A9	5	0.42481	0.55042	1	1836	2	-0.20789	0.048692	0.14605	1	417	1	-0.20789
TAP2	5	0.42521	0.5525	1	1837	2	0.17947	0.19222	0.40927	1	1165	3	0.17947
ENPP1	5	0.4256	0.5525	1	1838	1	0.13146	0.19815	0.41671	1	1192	3	0.13146
SLC11A2	5	0.42618	0.5525	1	1839	2	0.065391	0.47525	0.64591	1	1950	1	0.065391
CYP20A1	5	0.42676	0.5525	1	1840	1	-0.040797	0.47743	0.64947	1	1955	1	-0.040797
GALNT12	5	0.42684	0.5525	1	1841	2	0.083988	0.76611	0.80134	1	2476	1	0.083988
MPG	5	0.42697	0.5525	1	1842	2	-0.12504	0.37728	0.56157	1	1691	2	-0.12504
MPP2	5	0.42715	0.5525	1	1843	1	-0.0696	0.90188	0.91811	1	2846	0	-0.0696
SLC5A10	5	0.42786	0.5525	1	1844	2	-0.071474	0.8673	0.87902	1	2733	0	-0.071474
PLA2G2C	5	0.42799	0.5525	1	1845	2	-0.10191	0.20963	0.42986	1	1226	2	-0.10191
LIPM	5	0.42813	0.5525	1	1846	2	-0.065885	0.38035	0.5644	1	1701	2	-0.065885
GSR	5	0.42832	0.5525	1	1847	1	0.32752	0.038485	0.11567	1	353	4	0.32752
TNL	5	0.42862	0.5525	1	1848	2	0.028846	0.79803	0.81981	1	2546	1	0.028846
COMTD1	5	0.42887	0.5525	1	1849	2	0.038759	0.18258	0.38162	1	1126	2	0.038759
ELOVL3	5	0.4289	0.5525	1	1850	1	0.1257	0.46035	0.62906	1	1903	2	0.1257
UQCRH	5	0.42948	0.55408	1	1851	1	-0.017837	0.076608	0.20856	1	554	2	-0.017837
ALG3	5	0.43014	0.5561	1	1852	2	0.14563	0.15163	0.31938	1	971	2	0.14563
EDN1	5	0.43065	0.55805	1	1853	2	-0.076759	0.25771	0.462	1	1353	2	-0.076759
NUDT4	5	0.43091	0.55805	1	1854	2	0.012694	0.32527	0.51812	1	1541	1	0.012694
HADHB	5	0.4323	0.55805	1	1855	2	-0.11502	0.4416	0.61548	1	1846	1	-0.11502
FABP3	5	0.43268	0.55805	1	1856	2	-0.17935	0.20785	0.42715	1	1221	2	-0.17935
PLPP5	5	0.43277	0.55805	1	1857	1	-0.026668	0.19173	0.40524	1	1161	2	-0.026668
ETFDH	5	0.43316	0.55805	1	1858	1	0.20452	0.02927	0.091614	1	274	2	0.20452
B3GAT3	5	0.43345	0.55805	1	1859	2	-0.043691	0.59509	0.73868	1	2208	1	-0.043691
CYP26C1	5	0.43446	0.56335	1	1860	2	-0.053486	0.76258	0.79994	1	2474	1	-0.053486
CACNG1	5	0.4347	0.56335	1	1861	2	-0.23264	0.88547	0.90017	1	2800	0	-0.23264
DHRS4L2	5	0.43528	0.56335	1	1862	1	-0.19843	0.28487	0.49106	1	1425	1	-0.19843
GGCT	5	0.43535	0.56335	1	1863	2	0.1832	0.27066	0.47067	1	1388	2	0.1832
PCK1	5	0.43598	0.56335	1	1864	2	0.39623	0.049425	0.14605	1	421	3	0.39623
ATP1A1	5	0.43712	0.56335	1	1865	2	0.06888	0.22338	0.44151	1	1264	1	0.06888
OXA1L	5	0.43763	0.56335	1	1866	2	-0.035157	0.80355	0.82566	1	2556	1	-0.035157
FLVCR2	5	0.43776	0.56335	1	1867	2	0.17322	0.093083	0.23171	1	645	2	0.17322
GCNT4	5	0.43839	0.56335	1	1868	2	0.22099	0.14975	0.31786	1	959	3	0.22099
NDUFC1	5	0.43852	0.56335	1	1869	2	0.1148	0.36908	0.55454	1	1669	2	0.1148
PNPLA8	5	0.43892	0.56335	1	1870	2	-0.17927	0.86712	0.87902	1	2731	0	-0.17927
LRAT	5	0.43928	0.56335	1	1871	2	-0.067372	0.71835	0.7801	1	2401	1	-0.067372
ATP2C2	5	0.4394	0.56335	1	1872	2	-0.038391	0.056837	0.15492	1	464	2	-0.038391
MTMR14	5	0.43991	0.56551	1	1873	2	0.019475	0.46643	0.63382	1	1925	2	0.019475
ADAD2	5	0.44231	0.56551	1	1874	2	-0.054068	0.49636	0.6736	1	2015	2	-0.054068
DHRS7C	5	0.44255	0.56551	1	1875	1	-0.032654	0.42417	0.60569	1	1806	2	-0.032654
ABCB6	5	0.44257	0.56551	1	1876	2	-0.030578	0.11589	0.27776	1	777	2	-0.030578
GCNT7	5	0.4432	0.56751	1	1877	2	-0.22676	0.88596	0.90136	1	2802	0	-0.22676
SLC22A23	5	0.44331	0.56751	1	1878	1	-0.079507	0.89954	0.91699	1	2842	0	-0.079507
DCT	5	0.44521	0.56751	1	1879	2	-0.043825	0.033151	0.10189	1	307	2	-0.043825
ABCG2	5	0.44611	0.56751	1	1880	2	0.023539	0.4499	0.62208	1	1867	2	0.023539
SULT2A1	5	0.44616	0.56751	1	1881	1	0.059738	0.035484	0.10887	1	322	2	0.059738
ASAH2B	5	0.44674	0.56751	1	1882	2	0.18573	0.20336	0.42041	1	1211	3	0.18573
ATP5ME	5	0.4471	0.56751	1	1883	1	0.034268	0.2369	0.45046	1	1302	2	0.034268
SHMT1	5	0.4475	0.56941	1	1884	2	0.095274	0.28184	0.48857	1	1417	1	0.095274
KDM5C	5	0.44824	0.56941	1	1885	2	0.2497	0.067969	0.18372	1	513	3	0.2497
CYB5D2	5	0.44889	0.57133	1	1886	2	-0.22566	0.90306	0.9202	1	2849	0	-0.22566
B3GNT9	5	0.44918	0.57133	1	1887	1	0.37501	0.076899	0.20856	1	558	3	0.37501
SLC22A4	5	0.44937	0.57133	1	1888	2	0.0053352	0.48747	0.65578	1	1989	1	0.0053352
DGUOK	5	0.44993	0.57133	1	1889	2	-0.19999	0.65057	0.75135	1	2281	1	-0.19999
ADPRM	5	0.45012	0.57133	1	1890	2	-0.30338	0.25607	0.462	1	1349	1	-0.30338
PGAP1	5	0.4504	0.57133	1	1891	2	-0.016512	0.89416	0.90946	1	2829	0	-0.016512
DGKG	5	0.45125	0.57133	1	1892	2	0.036356	0.90964	0.92431	1	2872	0	0.036356
HK2	5	0.45141	0.57133	1	1893	2	-0.05511	0.070724	0.18889	1	526	2	-0.05511
CYP4F2	5	0.45217	0.57133	1	1894	2	0.29238	0.10197	0.24016	1	705	3	0.29238
CBR1	5	0.45292	0.57286	1	1895	2	-0.056099	0.5827	0.733	1	2188	1	-0.056099
SLC6A5	5	0.45343	0.5749	1	1896	2	-0.051463	0.87571	0.89144	1	2759	0	-0.051463
COQ4	5	0.4538	0.5749	1	1897	2	-0.12246	0.25126	0.45816	1	1338	1	-0.12246
UPRT	5	0.45418	0.5749	1	1898	2	-0.12434	0.41258	0.59099	1	1773	2	-0.12434
GABRP	5	0.45494	0.5749	1	1899	2	-0.029227	0.020936	0.071724	1	220	2	-0.029227
ALKBH4	5	0.45506	0.5749	1	1900	2	-0.0089536	0.26567	0.46698	1	1376	2	-0.0089536
RCE1	5	0.45532	0.5749	1	1901	2	0.049353	0.095048	0.23171	1	662	2	0.049353
EXTL2	5	0.45537	0.5749	1	1902	2	-0.14296	0.93736	0.94477	1	2956	0	-0.14296
CLCNKB	5	0.45557	0.5749	1	1903	2	-0.0075866	0.16285	0.33501	1	1030	2	-0.0075866
PCYT1B	5	0.45569	0.5749	1	1904	2	-0.018204	0.16618	0.35004	1	1042	2	-0.018204
CACNB3	5	0.45593	0.5749	1	1905	2	0.46214	0.10909	0.26186	1	752	3	0.46214
LPL	5	0.45668	0.57884	1	1906	1	0.074971	0.29755	0.49709	1	1457	1	0.074971
SOD2	5	0.45695	0.57884	1	1907	2	-0.040934	0.96668	0.97322	1	3055	0	-0.040934
ECI2	5	0.45705	0.57884	1	1908	1	0.11117	0.23862	0.45046	1	1306	2	0.11117
STAT5A	5	0.45761	0.5804	1	1909	1	0.13713	0.066652	0.18371	1	509	2	0.13713
SMPDL3B	5	0.45808	0.5804	1	1910	2	-0.04498	0.87821	0.89525	1	2771	0	-0.04498
ALDH18A1	5	0.45834	0.5804	1	1911	2	-0.14884	0.82913	0.837	1	2625	1	-0.14884
SLC25A21	5	0.45846	0.5804	1	1912	2	0.36844	0.01042	0.037288	1	124	3	0.36844
GCNT3	5	0.45891	0.5804	1	1913	2	-0.025625	0.38932	0.57507	1	1726	2	-0.025625
FOXRED1	5	0.45947	0.5804	1	1914	1	0.6059	0.012513	0.043667	1	144	3	0.6059
SLC16A7	5	0.45972	0.5804	1	1915	2	0.10745	0.48447	0.65261	1	1982	2	0.10745
SFXN3	5	0.45984	0.5804	1	1916	2	0.1739	0.50138	0.67658	1	2028	1	0.1739
MFSD7	5	0.46003	0.5804	1	1917	1	0.11673	0.12504	0.28989	1	831	2	0.11673
ATP9B	5	0.46058	0.5804	1	1918	2	-0.18828	0.92954	0.94073	1	2932	0	-0.18828
SCN3A	5	0.46148	0.5804	1	1919	2	-0.20026	0.879	0.89525	1	2774	0	-0.20026
DSEL	5	0.46169	0.5804	1	1920	2	-0.055925	0.065502	0.18254	1	499	1	-0.055925
GLB1L3	5	0.46198	0.5804	1	1921	2	-0.11575	0.7147	0.77724	1	2398	1	-0.11575
ACVR1C	5	0.46211	0.5804	1	1922	2	0.54188	0.106	0.25409	1	726	3	0.54188
SLC10A4	5	0.46236	0.5804	1	1923	2	-0.078523	0.85933	0.87611	1	2704	1	-0.078523
B3GAT2	5	0.46354	0.5836	1	1924	1	0.023823	0.30304	0.50335	1	1482	2	0.023823
NPR1	5	0.46374	0.5836	1	1925	2	-0.1039	0.87714	0.89269	1	2766	0	-0.1039
ALG14	5	0.4641	0.5836	1	1926	1	0.099585	0.29064	0.4923	1	1441	2	0.099585
CHST1	5	0.46447	0.5836	1	1927	2	-0.076528	0.13337	0.30073	1	879	2	-0.076528
LYZL4	5	0.46465	0.5836	1	1928	1	0.16666	0.49624	0.6736	1	2013	2	0.16666
KCTD4	5	0.46474	0.5836	1	1929	2	0.059157	0.69818	0.76995	1	2366	1	0.059157
SMPDL3A	5	0.46487	0.58361	1	1930	2	0.051108	0.083471	0.21835	1	598	2	0.051108
GRIK5	5	0.4665	0.58361	1	1931	2	-0.10912	0.52175	0.70286	1	2086	1	-0.10912
MFSD11	5	0.467	0.58521	1	1932	2	0.04416	0.2018	0.41917	1	1206	2	0.04416
CYP4V2	5	0.46712	0.58521	1	1933	2	-0.087331	0.26692	0.46698	1	1380	2	-0.087331
SLC25A38	5	0.46722	0.58521	1	1934	2	0.17798	0.13624	0.30171	1	897	3	0.17798
HEPHL1	5	0.46725	0.58521	1	1935	2	0.089438	0.16051	0.33028	1	1007	2	0.089438
ALKBH3	5	0.468	0.58521	1	1936	2	0.22482	0.12683	0.29247	1	839	3	0.22482
CPT1C	5	0.46814	0.58521	1	1937	2	-0.063653	0.087732	0.22309	1	620	2	-0.063653
SLC30A4	5	0.46832	0.58521	1	1938	1	-0.12626	0.10982	0.26277	1	757	2	-0.12626
PLAAT3	5	0.46851	0.58521	1	1939	1	-0.033634	0.11203	0.266	1	762	2	-0.033634
IPPK	5	0.46888	0.58521	1	1940	2	0.074361	0.748	0.79021	1	2448	1	0.074361
KMT2D	5	0.46942	0.58683	1	1941	1	0.082253	0.17741	0.37509	1	1100	1	0.082253
SI	5	0.46979	0.58683	1	1942	2	-0.13621	0.67538	0.75854	1	2327	1	-0.13621
COQ10A	5	0.47	0.58683	1	1943	2	0.12123	0.17064	0.36108	1	1064	2	0.12123
PDE7A	5	0.47013	0.58683	1	1944	2	0.12501	0.36882	0.55454	1	1666	2	0.12501
SLC25A43	5	0.47025	0.58683	1	1945	2	-0.047682	0.82637	0.83565	1	2620	1	-0.047682
RDH10	5	0.4705	0.58683	1	1946	2	0.011272	0.93686	0.94477	1	2953	0	0.011272
P2RX3	5	0.4707	0.58683	1	1947	1	0.1021	0.52645	0.70733	1	2102	2	0.1021
ALKBH5	5	0.47075	0.58683	1	1948	2	-0.022637	0.91101	0.92623	1	2874	0	-0.022637
AOAH	5	0.47107	0.58683	1	1949	1	0.45839	0.042248	0.14091	1	381	3	0.45839
ABCC4	5	0.47125	0.58683	1	1950	1	0.021773	0.50311	0.67803	1	2038	1	0.021773
SLCO1C1	5	0.47226	0.58683	1	1951	2	-0.10946	0.053062	0.14661	1	444	1	-0.10946
SLC29A3	5	0.47313	0.58836	1	1952	2	-0.041138	0.87984	0.89657	1	2777	0	-0.041138
CNGA2	5	0.47325	0.58836	1	1953	2	0.052147	0.016447	0.055109	1	174	2	0.052147
PRDX3	5	0.47488	0.58836	1	1954	2	-0.016652	0.66182	0.75415	1	2303	1	-0.016652
FNTB	5	0.47563	0.58837	1	1955	2	0.16534	0.091472	0.23171	1	637	2	0.16534
ADSS2	5	0.47575	0.58837	1	1956	2	0.13414	0.16959	0.35998	1	1060	2	0.13414
ALG8	5	0.47598	0.58837	1	1957	1	0.21222	0.055104	0.15421	1	453	3	0.21222
OAT	5	0.47613	0.58837	1	1958	2	-0.10048	0.94452	0.94938	1	2981	0	-0.10048
GABRA6	5	0.47634	0.58837	1	1959	1	0.12786	0.36341	0.54647	1	1655	2	0.12786
DPYSL5	5	0.47688	0.58837	1	1960	1	0.074411	0.36425	0.54647	1	1658	2	0.074411
DEGS2	5	0.47706	0.58837	1	1961	1	-0.083032	0.4201	0.6027	1	1796	2	-0.083032
B4GALNT4	5	0.47775	0.58837	1	1962	2	-0.032144	0.52803	0.70733	1	2107	2	-0.032144
BEST4	5	0.478	0.58837	1	1963	2	-0.087305	0.17949	0.37944	1	1112	1	-0.087305
KCNT1	5	0.47862	0.58837	1	1964	2	-0.2202	0.97658	0.98238	1	3086	0	-0.2202
ECH1	5	0.47869	0.58837	1	1965	2	0.11089	0.18698	0.38937	1	1143	2	0.11089
PLCXD1	5	0.47875	0.58837	1	1966	2	-0.10749	0.97162	0.97608	1	3074	0	-0.10749
TCN2	5	0.47905	0.59022	1	1967	1	-0.11139	0.2335	0.44788	1	1291	2	-0.11139
LTC4S	5	0.47962	0.59188	1	1968	2	0.10589	0.16096	0.33028	1	1013	2	0.10589
ALDH16A1	5	0.47995	0.59351	1	1969	1	0.19059	0.073516	0.19402	1	541	3	0.19059
GLRA2	5	0.47999	0.59351	1	1970	2	0.4071	0.074301	0.19597	1	544	3	0.4071
PRPS1L1	5	0.48074	0.59527	1	1971	2	0.33107	0.13077	0.29653	1	867	3	0.33107
SRR	5	0.48111	0.59527	1	1972	2	-0.043331	0.25655	0.462	1	1350	2	-0.043331
NAT14	5	0.48121	0.59527	1	1973	1	0.084565	0.11449	0.27197	1	770	2	0.084565
TRPM6	5	0.48136	0.59527	1	1974	2	-0.10745	0.018433	0.067267	1	198	2	-0.10745
WWOX	5	0.48175	0.59527	1	1975	1	-0.060866	0.79188	0.81698	1	2533	1	-0.060866
LNPEP	5	0.48193	0.59527	1	1976	1	0.075393	0.16038	0.33028	1	1006	1	0.075393
CHRNA6	5	0.48273	0.59886	1	1977	2	0.15276	0.18929	0.39312	1	1151	3	0.15276
ATP8B3	5	0.48283	0.59886	1	1978	1	0.1456	0.48086	0.65104	1	1968	2	0.1456
GLT6D1	5	0.48318	0.59886	1	1979	1	0.45959	0.0036854	0.016388	1	46	4	0.45959
SLC7A1	5	0.48336	0.59886	1	1980	1	0.28739	0.16403	0.34139	1	1034	3	0.28739
PFKM	5	0.48372	0.59886	1	1981	2	0.086513	0.17481	0.36734	1	1089	2	0.086513
AKR1C1	5	0.48385	0.59887	1	1982	2	0.040809	0.0057208	0.022112	1	70	2	0.040809
KCNJ15	5	0.4841	0.59887	1	1983	2	-0.15253	0.96939	0.97532	1	3066	0	-0.15253
SLCO3A1	5	0.48551	0.60078	1	1984	1	0.39112	0.053883	0.1542	1	447	3	0.39112
AGPAT2	5	0.48702	0.60238	1	1985	2	0.15655	0.12762	0.29247	1	849	2	0.15655
OGFOD1	5	0.48733	0.60238	1	1986	2	0.073233	0.27041	0.47067	1	1387	2	0.073233
CKMT1A	5	0.48819	0.60238	1	1987	2	0.10582	0.30101	0.49827	1	1471	2	0.10582
SLC17A1	5	0.48871	0.60238	1	1988	2	0.15347	0.178	0.37806	1	1105	3	0.15347
KCTD14	5	0.48894	0.60238	1	1989	2	-0.02345	0.86153	0.87761	1	2711	1	-0.02345
ABCG4	5	0.48907	0.60238	1	1990	2	-0.021111	0.92037	0.931	1	2899	0	-0.021111
UGT1A7	5	0.48943	0.60238	1	1991	2	-0.20474	0.034598	0.10822	1	316	1	-0.20474
RGN	5	0.4896	0.60238	1	1992	1	0.26102	0.081001	0.2109	1	586	3	0.26102
GGT6	5	0.48993	0.60238	1	1993	2	-0.18065	0.014046	0.047387	1	153	2	-0.18065
LALBA	5	0.49018	0.60437	1	1994	2	-0.0030263	0.072072	0.19127	1	533	2	-0.0030263
MVK	5	0.49049	0.60437	1	1995	2	-0.12306	0.65552	0.75276	1	2291	1	-0.12306
KMO	5	0.49117	0.60437	1	1996	2	0.049439	0.68538	0.76716	1	2344	1	0.049439
PIK3R6	5	0.49154	0.60637	1	1997	2	-0.07488	0.81358	0.82984	1	2584	1	-0.07488
ATP5L2	5	0.49173	0.60637	1	1998	2	-0.072294	0.26243	0.462	1	1366	2	-0.072294
[truncated: 1,164 more rows]
