# Supplementary material
Source: Research Square preprint supplement (doi:10.21203/rs.3.rs-9593389/v1)
Supplement: Supplementary file 4 [file ca8d950e6aa8714a3314558d.xlsx]

## Sheet: Sheet1
Supplementary Table S5. Primary and secondary antibodies used in this study.
Target Antibody	Host Species	Dilution	Company & Catalog No.
RPE	Rabbit	1:1000 (WB), 1:250 (IHC)	Abcam, ab128891
FKBP5	Rabbit	1:1000 (WB), 1:250 (IHC)	Abcam, ab126715
AR	Rabbit	1:200 (IHC)	Proteintech, 22089-1-AP
PARP	Rabbit	1:5000 (WB)	Proteintech, 13371-1-AP
Cleaved PARP	Mouse	1:5000 (WB), 1:1000 (IHC)	Proteintech, 60555-1-Ig
Caspase-3	Rabbit	1:1000 (WB)	Cell Signaling Technology, #9662
Cleaved Caspase-3	Rabbit	1:1000 (WB), 1:400 (IHC)	Cell Signaling Technology, #9661
BAD	Rabbit	1:1000 (WB)	Cell Signaling Technology, #9292
p-BAD (Ser112)	Rabbit	1:1000 (WB), 1:200 (IHC)	Cell Signaling Technology, #5284
BCL-xL	Rabbit	1:2000 (WB), 1:50 (IHC)	Proteintech, 10783-1-AP
AKT	Rabbit	1:1000 (WB)	Cell Signaling Technology, #9272
p-AKT (Ser473)	Rabbit	1:2000 (WB)	Cell Signaling Technology, #4060
Flag	Mouse	1:1000 (WB)	Sigma-Aldrich, F1804-50UG
His	Rabbit	1:1000 (WB)	Cell Signaling Technology, #12698
GST	Mouse	1:1000 (WB)	Cell Signaling Technology, #2624
Ubiquitin	Mouse	1:1000 (WB)	Santa Cruz Biotechnology, sc-8017
β-actin	Mouse	1:20000 (WB)	Proteintech, 66009-1-Ig
Secondary Antibodies
HRP-conjugated anti-Rabbit IgG		1:3000 (WB)	Proteintech, RGAR001
HRP-conjugated anti-mouse IgG		1:3000 (WB)	Proteintech, RGAM001
