# Supplementary material
Source: Research Square preprint supplement (doi:10.21203/rs.3.rs-9593389/v1)
Supplement: Supplementary file 5 [file cf5abdaa8f3005f86975e2b6.xlsx]

## Sheet: Sheet1
Supplementary Table S3. siRNA and shRNA target sequences used in this study.
Target Gene (Human)	siRNA/shRNA	Sequence (5' - 3')
RPE	siRNA	Pooled target-specific siRNAs (Santa Cruz Biotechnology, sc-94945)
RPE	shRNA	Pooled target-specific shRNA (Santa Cruz Biotechnology, sc-94945-SH)
NAA50	siRNA	GCACCUUACCGAAGGCUAGTT
PGK1	siRNA	GCUUCUGGGAACAAGGUUAAA
OGDH	siRNA	CAGCATCCAAAATCCCCAG
GRIK1	siRNA	Pooled target-specific siRNAs (Santa Cruz Biotechnology, sc-42487)
FKBP5	siRNA	UCGGCUGGCAGUCUCCCUAAA
FKBP5	shRNA	GGGTAAACAGATTGAGCAT
siCtrl	siRNA	AUGGAAGAUGAUCUGGUGA
shCtrl	shRNA	CAACAAGATGAAGAGCACCAA
